# Supplementary material for: Cancers adapt to their mutational load by buffering protein misfolding stress
Source: eLife. 2024 Nov 25;12:RP87301. doi: 10.7554/eLife.87301 (PMC11588338; doi:10.7554/eLife.87301)
Supplement: Supplementary file 1. [file elife-87301-supp1.xlsx]

## Sheet: All Enrichment Terms (Fig.1)
source	term_name	p_value
CORUM	PA700-20S-PA28 complex	6.8444e-11
CORUM	55S ribosome, mitochondrial	1.09675e-10
CORUM	26S proteasome	1.31441e-06
CORUM	39S ribosomal subunit, mitochondrial	2.20942e-06
CORUM	Spliceosome	6.4573e-06
CORUM	PA700 complex	8.46923e-06
CORUM	17S U2 snRNP	0.000129959
CORUM	RC complex during G2/M-phase of cell cycle	0.000230539
CORUM	RC complex during S-phase of cell cycle	0.000230539
CORUM	PA28-20S proteasome	0.00033917
CORUM	PA28gamma-20S proteasome	0.000845327
CORUM	28S ribosomal subunit, mitochondrial	0.00119117
CORUM	DNA synthesome complex (17 subunits)	0.00186647
CORUM	DNA synthesome complex (17 subunits)	0.00186647
CORUM	20S proteasome	0.00209724
CORUM	DNA synthesome complex (13 subunits)	0.00517647
CORUM	DNA synthesome complex (15 subunits)	0.0102347
CORUM	RC complex (Replication competent complex)	0.0113431
CORUM	Nup 107-160 subcomplex	0.0113431
CORUM	DNA-PK-Ku-eIF2-NF90-NF45 complex	0.0300078
CORUM	CCT complex (chaperonin containing TCP1 complex)	0.0300078
CORUM	FA complex (Fanconi anemia complex)	0.030958
CORUM	BRAFT complex	0.030958
CORUM	CENP-H-I complex	0.030958
GO:BP	cellular macromolecule metabolic process	1.15027e-94
GO:BP	organic substance biosynthetic process	8.80969e-75
GO:BP	biosynthetic process	1.35537e-74
GO:BP	cellular biosynthetic process	3.54851e-74
GO:BP	cell cycle	3.05227e-64
GO:BP	macromolecule biosynthetic process	1.08446e-61
GO:BP	organonitrogen compound metabolic process	1.39148e-61
GO:BP	cellular macromolecule biosynthetic process	6.8158e-59
GO:BP	DNA metabolic process	1.73135e-58
GO:BP	cellular nitrogen compound biosynthetic process	3.08333e-58
GO:BP	cellular protein metabolic process	8.91894e-54
GO:BP	mitotic cell cycle	5.24064e-53
GO:BP	protein metabolic process	5.7225e-53
GO:BP	regulation of cellular metabolic process	2.06754e-51
GO:BP	mitotic cell cycle process	3.94605e-50
GO:BP	regulation of primary metabolic process	4.56927e-50
GO:BP	organelle organization	1.91514e-49
GO:BP	regulation of nitrogen compound metabolic process	8.24572e-49
GO:BP	cell cycle process	6.28482e-47
GO:BP	cellular response to stress	1.93066e-46
GO:BP	positive regulation of biological process	4.97212e-46
GO:BP	response to stress	7.12501e-46
GO:BP	positive regulation of macromolecule metabolic process	8.30787e-44
GO:BP	ribosome biogenesis	9.8755e-44
GO:BP	chromosome organization	7.5268e-43
GO:BP	positive regulation of cellular process	8.48858e-43
GO:BP	positive regulation of metabolic process	1.05866e-42
GO:BP	ncRNA metabolic process	2.21042e-41
GO:BP	organic cyclic compound biosynthetic process	3.50329e-38
GO:BP	rRNA metabolic process	1.78065e-37
GO:BP	positive regulation of nitrogen compound metabolic process	2.77408e-37
GO:BP	heterocycle biosynthetic process	2.84258e-37
GO:BP	positive regulation of cellular metabolic process	6.12537e-37
GO:BP	DNA repair	7.20815e-37
GO:BP	DNA replication	1.35775e-36
GO:BP	aromatic compound biosynthetic process	1.97144e-36
GO:BP	ncRNA processing	5.69443e-35
GO:BP	regulation of cellular process	6.28108e-35
GO:BP	regulation of cellular biosynthetic process	3.33638e-34
GO:BP	DNA-dependent DNA replication	3.40935e-34
GO:BP	nucleobase-containing compound biosynthetic process	4.51475e-34
GO:BP	rRNA processing	5.72307e-34
GO:BP	regulation of biosynthetic process	2.36596e-33
GO:BP	cell division	3.04774e-33
GO:BP	regulation of cell cycle	3.13966e-33
GO:BP	regulation of macromolecule biosynthetic process	9.53975e-33
GO:BP	cellular response to DNA damage stimulus	1.32052e-32
GO:BP	cell cycle phase transition	6.59161e-31
GO:BP	chromosome segregation	1.24685e-30
GO:BP	macromolecule modification	4.40782e-30
GO:BP	cellular process	8.8866e-30
GO:BP	regulation of nucleobase-containing compound metabolic process	8.89011e-30
GO:BP	mitotic cell cycle phase transition	1.68751e-29
GO:BP	regulation of protein metabolic process	1.99465e-29
GO:BP	regulation of metabolic process	2.92001e-29
GO:BP	regulation of cell cycle process	3.13819e-29
GO:BP	organonitrogen compound biosynthetic process	3.57803e-29
GO:BP	regulation of cellular macromolecule biosynthetic process	1.36637e-28
GO:BP	negative regulation of cellular process	4.30156e-28
GO:BP	organelle fission	5.2641e-28
GO:BP	cellular macromolecule catabolic process	7.04615e-28
GO:BP	nuclear division	1.34022e-27
GO:BP	regulation of cellular protein metabolic process	1.75368e-26
GO:BP	translation	2.62206e-26
GO:BP	macromolecule catabolic process	3.11173e-26
GO:BP	catabolic process	3.37278e-26
GO:BP	peptide biosynthetic process	7.12169e-26
GO:BP	regulation of macromolecule metabolic process	8.16695e-26
GO:BP	cellular catabolic process	8.38228e-26
GO:BP	programmed cell death	2.09128e-25
GO:BP	positive regulation of cellular biosynthetic process	2.61799e-25
GO:BP	cellular protein modification process	5.67731e-25
GO:BP	protein modification process	5.67731e-25
GO:BP	mitotic nuclear division	6.47986e-25
GO:BP	amide biosynthetic process	8.35681e-25
GO:BP	cell death	9.4331e-25
GO:BP	apoptotic process	1.69558e-24
GO:BP	sister chromatid segregation	1.76166e-24
GO:BP	cellular metabolic process	1.80027e-24
GO:BP	biological process involved in interspecies interaction between organisms	2.49787e-24
GO:BP	positive regulation of biosynthetic process	3.03228e-24
GO:BP	mitotic sister chromatid segregation	5.02181e-24
GO:BP	cellular amide metabolic process	5.99744e-24
GO:BP	nuclear chromosome segregation	6.17409e-24
GO:BP	positive regulation of macromolecule biosynthetic process	8.03022e-24
GO:BP	RNA localization	8.74717e-24
GO:BP	peptide metabolic process	1.6536e-23
GO:BP	organic substance catabolic process	2.74477e-23
GO:BP	regulation of RNA metabolic process	4.19178e-23
GO:BP	nitrogen compound metabolic process	5.52828e-22
GO:BP	positive regulation of nucleobase-containing compound metabolic process	5.64379e-22
GO:BP	response to stimulus	1.14049e-21
GO:BP	regulation of mitotic cell cycle	1.91793e-21
GO:BP	response to biotic stimulus	4.11212e-21
GO:BP	cellular response to stimulus	1.23477e-20
GO:BP	heterocycle catabolic process	1.58761e-20
GO:BP	primary metabolic process	1.90066e-20
GO:BP	RNA biosynthetic process	2.19643e-20
GO:BP	response to organic substance	2.25363e-20
GO:BP	regulation of innate immune response	3.17089e-20
GO:BP	response to other organism	4.22699e-20
GO:BP	double-strand break repair	4.99501e-20
GO:BP	transcription, DNA-templated	5.59018e-20
GO:BP	nucleic acid-templated transcription	6.16918e-20
GO:BP	response to external biotic stimulus	6.66904e-20
GO:BP	regulation of cell cycle phase transition	7.48737e-20
GO:BP	cellular nitrogen compound catabolic process	9.18664e-20
GO:BP	response to cytokine	2.11412e-19
GO:BP	mitochondrion organization	2.38071e-19
GO:BP	biological regulation	2.67839e-19
GO:BP	regulation of translation	5.05687e-19
GO:BP	nucleobase-containing compound catabolic process	7.54152e-19
GO:BP	regulation of cellular amide metabolic process	9.51174e-19
GO:BP	immune system process	1.95585e-18
GO:BP	regulation of catabolic process	2.65952e-18
GO:BP	DNA recombination	4.99948e-18
GO:BP	organic cyclic compound catabolic process	5.86299e-18
GO:BP	aromatic compound catabolic process	5.96673e-18
GO:BP	innate immune response	8.8433e-18
GO:BP	regulation of mitotic cell cycle phase transition	1.25766e-17
GO:BP	regulation of biological process	1.32426e-17
GO:BP	RNA catabolic process	1.36335e-17
GO:BP	cellular response to cytokine stimulus	2.04546e-17
GO:BP	defense response to other organism	3.09841e-17
GO:BP	regulation of organelle organization	3.49822e-17
GO:BP	regulation of immune response	3.59137e-17
GO:BP	negative regulation of cell cycle process	4.62822e-17
GO:BP	viral process	5.56797e-17
GO:BP	negative regulation of nitrogen compound metabolic process	1.10173e-16
GO:BP	regulation of response to biotic stimulus	1.11501e-16
GO:BP	regulation of cellular catabolic process	1.55695e-16
GO:BP	positive regulation of RNA metabolic process	2.15633e-16
GO:BP	positive regulation of innate immune response	2.87552e-16
GO:BP	mitochondrial gene expression	5.04672e-16
GO:BP	regulation of RNA biosynthetic process	5.27504e-16
GO:BP	positive regulation of protein metabolic process	5.48412e-16
GO:BP	regulation of transcription, DNA-templated	6.83357e-16
GO:BP	regulation of nucleic acid-templated transcription	7.47687e-16
GO:BP	immune system development	8.45582e-16
GO:BP	regulation of programmed cell death	8.56655e-16
GO:BP	regulation of immune system process	8.94166e-16
GO:BP	regulation of cell death	9.38954e-16
GO:BP	negative regulation of cellular metabolic process	1.08142e-15
GO:BP	nucleic acid transport	1.16141e-15
GO:BP	RNA transport	1.16141e-15
GO:BP	positive regulation of immune system process	1.43053e-15
GO:BP	regulation of apoptotic process	1.61974e-15
GO:BP	negative regulation of cell cycle	4.07189e-15
GO:BP	protein catabolic process	4.2948e-15
GO:BP	establishment of RNA localization	5.16335e-15
GO:BP	proteolysis involved in cellular protein catabolic process	5.44316e-15
GO:BP	phosphorus metabolic process	6.699e-15
GO:BP	positive regulation of gene expression	1.00798e-14
GO:BP	organonitrogen compound catabolic process	1.05915e-14
GO:BP	nucleic acid phosphodiester bond hydrolysis	1.07183e-14
GO:BP	regulation of DNA metabolic process	1.36897e-14
GO:BP	cellular protein catabolic process	1.43289e-14
GO:BP	negative regulation of cell cycle phase transition	2.11848e-14
GO:BP	positive regulation of cell cycle	2.41305e-14
GO:BP	phosphate-containing compound metabolic process	2.54293e-14
GO:BP	nuclear transport	2.68462e-14
GO:BP	nucleocytoplasmic transport	2.68462e-14
GO:BP	regulation of mRNA metabolic process	2.95612e-14
GO:BP	nuclear export	2.96248e-14
GO:BP	DNA conformation change	3.89826e-14
GO:BP	positive regulation of cellular protein metabolic process	3.95689e-14
GO:BP	apoptotic signaling pathway	4.87446e-14
GO:BP	immune response	5.2605e-14
GO:BP	positive regulation of response to biotic stimulus	5.42158e-14
GO:BP	defense response	5.88095e-14
GO:BP	mRNA catabolic process	6.55347e-14
GO:BP	regulation of response to stress	8.73451e-14
GO:BP	non-membrane-bounded organelle assembly	9.15394e-14
GO:BP	cellular response to chemical stimulus	1.05758e-13
GO:BP	positive regulation of molecular function	1.5668e-13
GO:BP	meiotic cell cycle	1.66214e-13
GO:BP	proteolysis	2.80973e-13
GO:BP	regulation of chromosome organization	2.85107e-13
GO:BP	hematopoietic or lymphoid organ development	3.20538e-13
GO:BP	DNA geometric change	3.59076e-13
GO:BP	modification-dependent macromolecule catabolic process	3.77126e-13
GO:BP	positive regulation of immune response	4.67207e-13
GO:BP	negative regulation of biosynthetic process	5.77222e-13
GO:BP	positive regulation of RNA biosynthetic process	5.89985e-13
GO:BP	developmental process	6.07323e-13
GO:BP	negative regulation of macromolecule biosynthetic process	6.25569e-13
GO:BP	telomere maintenance	6.42127e-13
GO:BP	negative regulation of biological process	6.42457e-13
GO:BP	mRNA transport	8.73685e-13
GO:BP	protein folding	1.00259e-12
GO:BP	positive regulation of nucleic acid-templated transcription	1.24713e-12
GO:BP	positive regulation of transcription, DNA-templated	1.24713e-12
GO:BP	negative regulation of cellular biosynthetic process	1.60131e-12
GO:BP	macromolecule localization	1.75705e-12
GO:BP	cell cycle G2/M phase transition	1.89339e-12
GO:BP	hemopoiesis	2.25133e-12
GO:BP	modification-dependent protein catabolic process	3.43185e-12
GO:BP	ubiquitin-dependent protein catabolic process	3.72647e-12
GO:BP	proteasomal protein catabolic process	4.06146e-12
GO:BP	regulation of chromosome segregation	4.78258e-12
GO:BP	microtubule cytoskeleton organization involved in mitosis	4.8343e-12
GO:BP	regulation of molecular function	4.91102e-12
GO:BP	nucleobase-containing compound transport	5.25848e-12
GO:BP	spindle organization	5.59318e-12
GO:BP	regulation of gene expression	5.76809e-12
GO:BP	cellular localization	5.86007e-12
GO:BP	DNA duplex unwinding	7.24528e-12
GO:BP	mitotic spindle organization	8.74209e-12
GO:BP	double-strand break repair via homologous recombination	1.14924e-11
GO:BP	G2/M transition of mitotic cell cycle	1.16831e-11
GO:BP	cell cycle checkpoint signaling	2.30979e-11
GO:BP	small molecule metabolic process	2.50545e-11
GO:BP	recombinational repair	2.8973e-11
GO:BP	viral life cycle	3.92403e-11
GO:BP	response to virus	4.38019e-11
GO:BP	leukocyte activation	5.53163e-11
GO:BP	proteasome-mediated ubiquitin-dependent protein catabolic process	5.55409e-11
GO:BP	protein localization to nucleus	6.47914e-11
GO:BP	RNA 3'-end processing	6.50274e-11
GO:BP	T cell receptor signaling pathway	7.05527e-11
GO:BP	meiotic cell cycle process	8.24733e-11
GO:BP	regulation of mitotic sister chromatid separation	8.98628e-11
GO:BP	cellular response to organic substance	9.38223e-11
GO:BP	DNA biosynthetic process	9.6741e-11
GO:BP	regulation of response to stimulus	1.207e-10
GO:BP	mitotic sister chromatid separation	1.33192e-10
GO:BP	positive regulation of cell cycle process	1.47269e-10
GO:BP	regulation of cellular component organization	1.50472e-10
GO:BP	response to abiotic stimulus	1.57859e-10
GO:BP	RNA phosphodiester bond hydrolysis	1.58192e-10
GO:BP	positive regulation of cytokine production	1.6279e-10
GO:BP	generation of precursor metabolites and energy	1.82847e-10
GO:BP	peptidyl-amino acid modification	1.94225e-10
GO:BP	protein modification by small protein conjugation or removal	2.00319e-10
GO:BP	regulation of nuclear division	2.69373e-10
GO:BP	response to external stimulus	3.12113e-10
GO:BP	transcription by RNA polymerase II	3.58386e-10
GO:BP	regulation of chromosome separation	3.8345e-10
GO:BP	regulation of cell cycle G2/M phase transition	4.13474e-10
GO:BP	mitochondrial translation	4.23277e-10
GO:BP	establishment of protein localization	5.04108e-10
GO:BP	cytokine-mediated signaling pathway	5.19782e-10
GO:BP	response to chemical	5.61757e-10
GO:BP	cell activation	5.86223e-10
GO:BP	protein modification by small protein conjugation	7.62599e-10
GO:BP	intracellular signal transduction	7.77475e-10
GO:BP	nitrogen compound transport	8.08791e-10
GO:BP	regulation of defense response	8.72941e-10
GO:BP	metaphase/anaphase transition of mitotic cell cycle	9.01525e-10
GO:BP	regulation of G2/M transition of mitotic cell cycle	9.54296e-10
GO:BP	T cell activation	9.84143e-10
GO:BP	chromosome separation	1.06846e-09
GO:BP	metabolic process	1.53053e-09
GO:BP	DNA replication initiation	2.06543e-09
GO:BP	lymphocyte activation	2.1285e-09
GO:BP	regulation of RNA stability	2.13443e-09
GO:BP	regulation of sister chromatid segregation	2.2702e-09
GO:BP	negative regulation of mitotic cell cycle phase transition	2.56001e-09
GO:BP	negative regulation of nuclear division	2.79752e-09
GO:BP	G1/S transition of mitotic cell cycle	2.97385e-09
GO:BP	protein localization to organelle	3.73231e-09
GO:BP	electron transport chain	3.90436e-09
GO:BP	regulation of catalytic activity	3.92219e-09
GO:BP	tRNA metabolic process	4.54663e-09
GO:BP	positive regulation of defense response	4.5582e-09
GO:BP	organic substance transport	4.98905e-09
GO:BP	regulation of mRNA catabolic process	4.99994e-09
GO:BP	negative regulation of mitotic cell cycle	5.15606e-09
GO:BP	positive regulation of proteolysis	5.69249e-09
GO:BP	anatomical structure development	6.33899e-09
GO:BP	maturation of 5.8S rRNA	6.65282e-09
GO:BP	metaphase/anaphase transition of cell cycle	7.86299e-09
GO:BP	activation of innate immune response	8.28332e-09
GO:BP	regulation of mitotic metaphase/anaphase transition	8.71443e-09
GO:BP	regulation of mitotic nuclear division	9.67387e-09
GO:BP	regulation of DNA-dependent DNA replication	1.1644e-08
GO:BP	protein ubiquitination	1.17962e-08
GO:BP	RNA export from nucleus	1.35141e-08
GO:BP	cellular nitrogen compound metabolic process	1.42034e-08
GO:BP	translational initiation	1.46791e-08
GO:BP	positive regulation of catalytic activity	1.47791e-08
GO:BP	phosphorylation	1.67027e-08
GO:BP	telomere organization	1.67123e-08
GO:BP	leukocyte differentiation	1.83568e-08
GO:BP	nucleus organization	1.91441e-08
GO:BP	regulation of mRNA stability	1.96615e-08
GO:BP	antigen processing and presentation	2.23345e-08
GO:BP	protein localization	2.2911e-08
GO:BP	ribosomal large subunit biogenesis	2.36954e-08
GO:BP	spindle assembly	2.37149e-08
GO:BP	meiotic nuclear division	2.47142e-08
GO:BP	establishment of localization	2.69858e-08
GO:BP	intracellular transport	3.06624e-08
GO:BP	response to interferon-gamma	3.22012e-08
GO:BP	intrinsic apoptotic signaling pathway	3.39671e-08
GO:BP	negative regulation of nucleobase-containing compound metabolic process	3.64962e-08
GO:BP	ribosomal small subunit biogenesis	4.34421e-08
GO:BP	protein localization to mitochondrion	5.06453e-08
GO:BP	cellular component disassembly	5.18931e-08
GO:BP	positive regulation of DNA metabolic process	5.61215e-08
GO:BP	positive regulation of cell death	6.16633e-08
GO:BP	regulation of metaphase/anaphase transition of cell cycle	6.91737e-08
GO:BP	cell cycle DNA replication	7.62918e-08
GO:BP	regulation of cytokine production	9.24188e-08
GO:BP	nucleobase-containing small molecule metabolic process	9.5927e-08
GO:BP	negative regulation of RNA metabolic process	9.89815e-08
GO:BP	cell population proliferation	1.02241e-07
GO:BP	DNA strand elongation involved in DNA replication	1.03698e-07
GO:BP	cellular macromolecule localization	1.12324e-07
GO:BP	regulation of cellular response to stress	1.19247e-07
GO:BP	regulation of cellular localization	1.27711e-07
GO:BP	mononuclear cell differentiation	1.3647e-07
GO:BP	response to ionizing radiation	1.36662e-07
GO:BP	positive regulation of mitotic cell cycle	1.3938e-07
GO:BP	DNA strand elongation	1.42267e-07
GO:BP	cell cycle G1/S phase transition	1.52344e-07
GO:BP	cellular protein localization	1.59264e-07
GO:BP	antigen processing and presentation of exogenous peptide antigen	1.59976e-07
GO:BP	antigen processing and presentation of peptide antigen	1.70822e-07
GO:BP	antigen processing and presentation of exogenous antigen	1.87979e-07
GO:BP	organic substance metabolic process	1.88988e-07
GO:BP	defense response to virus	1.90214e-07
GO:BP	negative regulation of mitotic nuclear division	1.91738e-07
GO:BP	aging	1.93577e-07
GO:BP	regulation of transcription by RNA polymerase II	2.14931e-07
GO:BP	cytokine production	2.15864e-07
GO:BP	regulation of type I interferon production	2.19537e-07
GO:BP	type I interferon production	2.19537e-07
GO:BP	regulation of DNA replication	2.23792e-07
GO:BP	defense response to symbiont	2.4269e-07
GO:BP	viral genome replication	2.55445e-07
GO:BP	negative regulation of cellular macromolecule biosynthetic process	2.55923e-07
GO:BP	ATP metabolic process	2.69068e-07
GO:BP	protein transport	2.7077e-07
GO:BP	negative regulation of cell death	2.72383e-07
GO:BP	establishment of protein localization to mitochondrion	2.84175e-07
GO:BP	positive regulation of response to stimulus	2.92448e-07
GO:BP	positive regulation of programmed cell death	3.24212e-07
GO:BP	protein localization to chromosome	3.43864e-07
GO:BP	protein import	3.74879e-07
GO:BP	negative regulation of programmed cell death	3.82971e-07
GO:BP	positive regulation of organelle organization	4.63513e-07
GO:BP	cellular respiration	5.0558e-07
GO:BP	positive regulation of translation	5.05676e-07
GO:BP	positive regulation of response to external stimulus	5.32711e-07
GO:BP	cellular response to interferon-gamma	5.41686e-07
GO:BP	positive regulation of apoptotic process	5.84206e-07
GO:BP	negative regulation of mitotic sister chromatid separation	5.89248e-07
GO:BP	negative regulation of sister chromatid segregation	5.89248e-07
GO:BP	anaphase-promoting complex-dependent catabolic process	5.89248e-07
GO:BP	negative regulation of mitotic sister chromatid segregation	5.89248e-07
GO:BP	establishment of localization in cell	6.21738e-07
GO:BP	mitochondrial membrane organization	7.21367e-07
GO:BP	immune response-regulating signaling pathway	7.68763e-07
GO:BP	negative regulation of protein metabolic process	8.0338e-07
GO:BP	negative regulation of chromosome organization	8.43896e-07
GO:BP	regulation of mitotic sister chromatid segregation	8.88974e-07
GO:BP	positive regulation of type I interferon production	8.95414e-07
GO:BP	positive regulation of cellular amide metabolic process	1.07665e-06
GO:BP	regulation of T cell activation	1.08557e-06
GO:BP	leukocyte cell-cell adhesion	1.11569e-06
GO:BP	mitotic cell cycle checkpoint signaling	1.12126e-06
GO:BP	response to endoplasmic reticulum stress	1.14473e-06
GO:BP	cellular developmental process	1.15357e-06
GO:BP	regulation of protein modification process	1.23066e-06
GO:BP	localization	1.29076e-06
GO:BP	nucleoside monophosphate biosynthetic process	1.30513e-06
GO:BP	multicellular organism development	1.44512e-06
GO:BP	positive regulation of cellular catabolic process	1.50343e-06
GO:BP	carbohydrate derivative metabolic process	1.56344e-06
GO:BP	negative regulation of apoptotic process	1.62146e-06
GO:BP	regulation of interferon-gamma production	1.66016e-06
GO:BP	negative regulation of translation	1.98189e-06
GO:BP	nucleobase biosynthetic process	2.10744e-06
GO:BP	negative regulation of nucleic acid-templated transcription	2.30564e-06
GO:BP	interferon-gamma production	2.4376e-06
GO:BP	maturation of SSU-rRNA	2.517e-06
GO:BP	maturation of 5.8S rRNA from tricistronic rRNA transcript (SSU-rRNA, 5.8S rRNA, LSU-rRNA)	2.56229e-06
GO:BP	negative regulation of chromosome segregation	2.78274e-06
GO:BP	negative regulation of chromosome separation	2.78274e-06
GO:BP	negative regulation of RNA biosynthetic process	2.79602e-06
GO:BP	negative regulation of transcription, DNA-templated	2.87256e-06
GO:BP	nucleobase metabolic process	3.17782e-06
GO:BP	negative regulation of immune response	3.7802e-06
GO:BP	antigen processing and presentation of peptide antigen via MHC class I	3.80299e-06
GO:BP	mitotic spindle assembly	3.86335e-06
GO:BP	positive regulation of catabolic process	3.9478e-06
GO:BP	nuclear DNA replication	3.96271e-06
GO:BP	positive regulation of transcription by RNA polymerase II	4.03179e-06
GO:BP	regulation of leukocyte cell-cell adhesion	4.37597e-06
GO:BP	regulation of viral life cycle	4.48603e-06
GO:BP	regulation of binding	4.71109e-06
GO:BP	lymphocyte differentiation	4.8724e-06
GO:BP	activation of immune response	5.03276e-06
GO:BP	endoplasmic reticulum to Golgi vesicle-mediated transport	5.36059e-06
GO:BP	regulation of hematopoietic stem cell differentiation	5.63649e-06
GO:BP	negative regulation of mitotic metaphase/anaphase transition	6.07682e-06
GO:BP	cellular response to lectin	6.07682e-06
GO:BP	response to lectin	6.07682e-06
GO:BP	negative regulation of cellular protein metabolic process	6.38503e-06
GO:BP	histone modification	6.6367e-06
GO:BP	organophosphate biosynthetic process	6.75905e-06
GO:BP	positive regulation of interferon-gamma production	7.48574e-06
GO:BP	signal transduction in response to DNA damage	7.51339e-06
GO:BP	organelle localization	7.72211e-06
GO:BP	negative regulation of cellular amide metabolic process	7.84761e-06
GO:BP	innate immune response-activating signal transduction	8.59935e-06
GO:BP	small molecule biosynthetic process	9.00658e-06
GO:BP	T cell differentiation	9.07577e-06
GO:BP	transcription by RNA polymerase I	9.36809e-06
GO:BP	positive regulation of binding	9.5911e-06
GO:BP	regulation of protein modification by small protein conjugation or removal	9.89662e-06
GO:BP	positive regulation of transcription by RNA polymerase I	1.00372e-05
GO:BP	antigen processing and presentation of exogenous peptide antigen via MHC class I	1.09816e-05
GO:BP	aerobic respiration	1.165e-05
GO:BP	organophosphate metabolic process	1.24927e-05
GO:BP	DNA integrity checkpoint signaling	1.26463e-05
GO:BP	positive regulation of multicellular organismal process	1.2862e-05
GO:BP	regulation of viral process	1.29372e-05
GO:BP	transport	1.39416e-05
GO:BP	mitochondrial RNA metabolic process	1.43912e-05
GO:BP	response to radiation	1.49923e-05
GO:BP	leukocyte mediated cytotoxicity	1.63187e-05
GO:BP	protein targeting to mitochondrion	1.67508e-05
GO:BP	response to topologically incorrect protein	1.73842e-05
GO:BP	regulation of apoptotic signaling pathway	1.77416e-05
GO:BP	stimulatory C-type lectin receptor signaling pathway	1.91345e-05
GO:BP	negative regulation of metabolic process	1.9479e-05
GO:BP	positive regulation of mitotic cell cycle phase transition	1.97344e-05
GO:BP	nucleoside monophosphate metabolic process	1.98816e-05
GO:BP	negative regulation of cell cycle G2/M phase transition	1.99081e-05
GO:BP	interleukin-1-mediated signaling pathway	2.20745e-05
GO:BP	regulation of transferase activity	2.25006e-05
GO:BP	response to tumor necrosis factor	2.49204e-05
GO:BP	cell killing	2.50426e-05
GO:BP	regulation of proteolysis	2.53642e-05
GO:BP	negative regulation of metaphase/anaphase transition of cell cycle	2.62149e-05
GO:BP	innate immune response activating cell surface receptor signaling pathway	2.62149e-05
GO:BP	regulation of transcription by RNA polymerase I	2.65892e-05
GO:BP	chromatin organization	2.72053e-05
GO:BP	metaphase plate congression	2.72709e-05
GO:BP	microtubule cytoskeleton organization	2.96257e-05
GO:BP	negative regulation of G2/M transition of mitotic cell cycle	3.12008e-05
GO:BP	cell differentiation	3.28558e-05
GO:BP	centrosome cycle	3.41326e-05
GO:BP	carbohydrate derivative biosynthetic process	3.48417e-05
GO:BP	response to unfolded protein	3.80806e-05
GO:BP	negative regulation of organelle organization	3.95513e-05
GO:BP	cellular response to oxidative stress	4.04138e-05
GO:BP	negative regulation of immune system process	4.10101e-05
GO:BP	nucleotide metabolic process	4.24042e-05
GO:BP	cellular response to chemical stress	4.28559e-05
GO:BP	tRNA processing	4.70017e-05
GO:BP	chromosome localization	4.74465e-05
GO:BP	negative regulation of macromolecule metabolic process	4.7669e-05
GO:BP	reproduction	4.88053e-05
GO:BP	maturation of LSU-rRNA	5.19218e-05
GO:BP	reproductive process	5.45679e-05
GO:BP	positive regulation of mRNA metabolic process	5.47115e-05
GO:BP	regulation of lymphocyte differentiation	5.59437e-05
GO:BP	nucleoside phosphate metabolic process	5.73766e-05
GO:BP	mitochondrial transport	5.81148e-05
GO:BP	mitotic spindle checkpoint signaling	5.94008e-05
GO:BP	mitotic spindle assembly checkpoint signaling	5.94008e-05
GO:BP	spindle assembly checkpoint signaling	5.94008e-05
GO:BP	ribonucleoside monophosphate biosynthetic process	6.08099e-05
GO:BP	protein export from nucleus	6.18915e-05
GO:BP	neuron death	6.34143e-05
GO:BP	cellular amino acid metabolic process	6.39341e-05
GO:BP	positive regulation of cell cycle phase transition	6.48257e-05
GO:BP	positive regulation of immune effector process	6.81065e-05
GO:BP	cleavage involved in rRNA processing	7.06254e-05
GO:BP	regulation of lymphocyte proliferation	7.25059e-05
GO:BP	establishment of chromosome localization	7.42384e-05
GO:BP	post-translational protein modification	7.58597e-05
GO:BP	positive regulation of peptidase activity	8.12499e-05
GO:BP	regulation of response to DNA damage stimulus	8.35895e-05
GO:BP	regulation of response to external stimulus	8.77822e-05
GO:BP	positive regulation of T cell activation	8.8459e-05
GO:BP	protein polyubiquitination	9.42607e-05
GO:BP	biological process involved in symbiotic interaction	9.56768e-05
GO:BP	immune response-regulating cell surface receptor signaling pathway	9.85808e-05
GO:BP	apoptotic mitochondrial changes	9.9917e-05
GO:BP	regulation of mitochondrion organization	0.00010022
GO:BP	regulation of biological quality	0.000101009
GO:BP	regulation of protein ubiquitination	0.00010709
GO:BP	response to oxygen-containing compound	0.000109689
GO:BP	regulation of translational initiation	0.000116171
GO:BP	respiratory electron transport chain	0.000117725
GO:BP	meiosis I cell cycle process	0.00011892
GO:BP	spindle checkpoint signaling	0.0001198
GO:BP	establishment of organelle localization	0.000120558
GO:BP	antigen processing and presentation of exogenous peptide antigen via MHC class I, TAP-dependent	0.000120587
GO:BP	regulation of signal transduction	0.00012076
GO:BP	regulation of leukocyte activation	0.000128848
GO:BP	positive regulation of protein localization to chromosome, telomeric region	0.00013107
GO:BP	positive regulation of leukocyte mediated immunity	0.000132971
GO:BP	oxoacid metabolic process	0.000139214
GO:BP	regulation of mononuclear cell proliferation	0.00014066
GO:BP	pre-replicative complex assembly	0.000148715
GO:BP	animal organ development	0.000150272
GO:BP	deoxyribonucleotide metabolic process	0.000151769
GO:BP	peptidyl-lysine modification	0.000152482
GO:BP	carboxylic acid metabolic process	0.000161175
GO:BP	regulation of leukocyte mediated immunity	0.00016241
GO:BP	system development	0.000172815
GO:BP	positive regulation of T cell proliferation	0.00018106
GO:BP	establishment of protein localization to telomere	0.000185249
GO:BP	natural killer cell mediated immunity	0.000189017
GO:BP	response to interleukin-1	0.000204989
GO:BP	regulation of cell activation	0.000208756
GO:BP	ncRNA 3'-end processing	0.000211791
GO:BP	ribose phosphate metabolic process	0.000212842
GO:BP	Golgi vesicle transport	0.000216523
GO:BP	regulation of protein catabolic process	0.000217986
GO:BP	cellular response to interleukin-1	0.000225135
GO:BP	deoxyribose phosphate metabolic process	0.000233113
GO:BP	regulation of immune effector process	0.0002346
GO:BP	regulation of viral genome replication	0.000251465
GO:BP	nucleoside phosphate biosynthetic process	0.00025313
GO:BP	macromolecule methylation	0.000275888
GO:BP	protein-DNA complex subunit organization	0.000280585
GO:BP	regulation of protein localization	0.000295647
GO:BP	positive regulation of establishment of protein localization to telomere	0.000300967
GO:BP	purine nucleobase biosynthetic process	0.000300967
GO:BP	regulation of DNA repair	0.000304695
GO:BP	immune response-activating cell surface receptor signaling pathway	0.000310066
GO:BP	immune response-activating signal transduction	0.000310066
GO:BP	tumor necrosis factor-mediated signaling pathway	0.000341117
GO:BP	regulation of leukocyte differentiation	0.00034957
GO:BP	positive regulation of leukocyte cell-cell adhesion	0.000350151
GO:BP	cellular response to hypoxia	0.000350627
GO:BP	interstrand cross-link repair	0.000357353
GO:BP	regulation of neuron death	0.00035918
GO:BP	mitotic metaphase plate congression	0.000371191
GO:BP	cellular response to tumor necrosis factor	0.000371245
GO:BP	organic acid metabolic process	0.000374523
GO:BP	regulation of cell population proliferation	0.00038869
GO:BP	regulation of lymphocyte mediated immunity	0.000395035
GO:BP	meiosis I	0.00041021
GO:BP	rRNA transcription	0.000412734
GO:BP	RNA phosphodiester bond hydrolysis, exonucleolytic	0.0004389
GO:BP	purine nucleoside monophosphate biosynthetic process	0.000441619
GO:BP	positive regulation of endopeptidase activity	0.000443081
GO:BP	positive regulation of viral process	0.000450527
GO:BP	cellular response to decreased oxygen levels	0.00045184
GO:BP	vesicle budding from membrane	0.000461811
GO:BP	regulation of cyclin-dependent protein serine/threonine kinase activity	0.000467409
GO:BP	carbohydrate metabolic process	0.000477683
GO:BP	regulation of adaptive immune response based on somatic recombination of immune receptors built from immunoglobulin superfamily domains	0.000507626
GO:BP	response to oxidative stress	0.00055498
GO:BP	telomere maintenance via telomere lengthening	0.00057574
GO:BP	DNA damage checkpoint signaling	0.000578011
GO:BP	regulation of adaptive immune response	0.000603527
GO:BP	regulation of cyclin-dependent protein kinase activity	0.000612809
GO:BP	nucleotide biosynthetic process	0.000613313
GO:BP	process utilizing autophagic mechanism	0.00065802
GO:BP	autophagy	0.00065802
GO:BP	protein import into nucleus	0.000665551
GO:BP	NIK/NF-kappaB signaling	0.00067505
GO:BP	positive regulation of adaptive immune response based on somatic recombination of immune receptors built from immunoglobulin superfamily domains	0.000713845
GO:BP	negative regulation of innate immune response	0.0007167
GO:BP	regulation of T cell proliferation	0.000722381
GO:BP	ribonucleoside monophosphate metabolic process	0.000726036
GO:BP	natural killer cell mediated cytotoxicity	0.000728866
GO:BP	import into nucleus	0.000745329
GO:BP	mitotic DNA replication	0.000745811
GO:BP	GMP biosynthetic process	0.000745811
GO:BP	AMP biosynthetic process	0.000745811
GO:BP	positive regulation of lymphocyte proliferation	0.000756311
GO:BP	microtubule organizing center organization	0.000768488
GO:BP	regulation of cell communication	0.000779429
GO:BP	regulation of signaling	0.000784384
GO:BP	positive regulation of lymphocyte mediated immunity	0.000802304
GO:BP	viral gene expression	0.000862615
GO:BP	regulation of lymphocyte activation	0.000874191
GO:BP	intracellular protein transport	0.00087767
GO:BP	protein phosphorylation	0.000878276
GO:BP	base-excision repair	0.000909328
GO:BP	methylation	0.000926662
GO:BP	response to heat	0.000988186
GO:BP	regulation of leukocyte proliferation	0.000998393
GO:BP	negative regulation of response to stimulus	0.0010384
GO:BP	mRNA 3'-end processing	0.00105115
GO:BP	energy derivation by oxidation of organic compounds	0.00107974
GO:BP	nuclear-transcribed mRNA catabolic process	0.00109475
GO:BP	regulation of hematopoietic progenitor cell differentiation	0.00111428
GO:BP	positive regulation of mononuclear cell proliferation	0.00130019
GO:BP	T cell mediated immunity	0.00135878
GO:BP	regulation of phosphorus metabolic process	0.00137835
GO:BP	regulation of hemopoiesis	0.00145248
GO:BP	positive regulation of protein localization	0.00147582
GO:BP	regulation of DNA biosynthetic process	0.0014847
GO:BP	regulation of cysteine-type endopeptidase activity	0.00163032
GO:BP	telomere maintenance via telomerase	0.00164337
GO:BP	regulation of phosphate metabolic process	0.00165309
GO:BP	negative regulation of transcription by RNA polymerase II	0.00165463
GO:BP	positive regulation of hydrolase activity	0.00169243
GO:BP	regulation of mRNA processing	0.00169345
GO:BP	cellular defense response	0.00175356
GO:BP	regulation of intracellular signal transduction	0.00184093
GO:BP	negative regulation of leukocyte activation	0.00188101
GO:BP	negative regulation of apoptotic signaling pathway	0.00188783
GO:BP	regulation of protein export from nucleus	0.00191861
GO:BP	2'-deoxyribonucleotide metabolic process	0.00194242
GO:BP	inner mitochondrial membrane organization	0.00194242
GO:BP	heterocycle metabolic process	0.00195602
GO:BP	establishment of protein localization to chromosome	0.00197969
GO:BP	purine nucleobase metabolic process	0.00208509
GO:BP	RNA localization to nucleus	0.00208509
GO:BP	mitotic chromosome condensation	0.00208509
GO:BP	RNA localization to Cajal body	0.00208509
GO:BP	telomerase RNA localization to Cajal body	0.00208509
GO:BP	telomerase RNA localization	0.00208509
GO:BP	regulation of establishment of protein localization	0.00215012
GO:BP	oxidative phosphorylation	0.00219614
GO:BP	RNA modification	0.00223849
GO:BP	ribose phosphate biosynthetic process	0.00234035
GO:BP	cell aging	0.00237872
GO:BP	RNA-dependent DNA biosynthetic process	0.0024438
GO:BP	regulation of transcription from RNA polymerase II promoter in response to hypoxia	0.00248783
GO:BP	regulation of establishment of protein localization to telomere	0.00269951
GO:BP	hematopoietic stem cell differentiation	0.00276099
GO:BP	meiotic chromosome segregation	0.00282828
GO:BP	sister chromatid cohesion	0.00284766
GO:BP	granulocyte chemotaxis	0.00285099
GO:BP	myeloid cell homeostasis	0.00296437
GO:BP	maturation of SSU-rRNA from tricistronic rRNA transcript (SSU-rRNA, 5.8S rRNA, LSU-rRNA)	0.00302071
GO:BP	positive regulation of telomerase RNA localization to Cajal body	0.00303224
GO:BP	DNA unwinding involved in DNA replication	0.00303224
GO:BP	regulation of protein localization to chromosome, telomeric region	0.00303224
GO:BP	carbohydrate catabolic process	0.00308593
GO:BP	organic cyclic compound metabolic process	0.00329215
GO:BP	positive regulation of adaptive immune response	0.00339838
GO:BP	negative regulation of lymphocyte activation	0.00341021
GO:BP	positive regulation of leukocyte proliferation	0.00354426
GO:BP	positive regulation of DNA biosynthetic process	0.00381356
GO:BP	pyruvate metabolic process	0.00381599
GO:BP	positive regulation of mRNA processing	0.00382008
GO:BP	purine-containing compound metabolic process	0.0040127
GO:BP	positive regulation of cell population proliferation	0.00425366
GO:BP	ribosome assembly	0.00434087
GO:BP	regulation of proteasomal protein catabolic process	0.00443166
GO:BP	neuron apoptotic process	0.0044343
GO:BP	mRNA export from nucleus	0.0044397
GO:BP	cellular response to oxygen levels	0.00448248
GO:BP	macromolecule metabolic process	0.00469274
GO:BP	regulation of proteolysis involved in cellular protein catabolic process	0.00474575
GO:BP	mitotic cytokinesis	0.0048496
GO:BP	protein-containing complex disassembly	0.00494368
GO:BP	regulation of cell-cell adhesion	0.00505557
GO:BP	regulation of intrinsic apoptotic signaling pathway	0.00513233
GO:BP	regulation of autophagy	0.00518907
GO:BP	positive regulation of cell-cell adhesion	0.00518913
GO:BP	ribonucleotide metabolic process	0.00539792
GO:BP	purine ribonucleoside monophosphate biosynthetic process	0.00564102
GO:BP	regulation of T cell differentiation	0.00571713
GO:BP	cellular component organization or biogenesis	0.00577953
GO:BP	positive regulation of establishment of protein localization	0.00583343
GO:BP	protein insertion into mitochondrial membrane	0.00584904
GO:BP	regulation of cell killing	0.0059535
GO:BP	positive regulation of interferon-beta production	0.00607916
GO:BP	response to testosterone	0.00607916
GO:BP	DNA packaging	0.00617518
GO:BP	regulation of stem cell differentiation	0.00635132
GO:BP	positive regulation of mitochondrion organization	0.0069252
GO:BP	DNA modification	0.0070932
GO:BP	regulation of intracellular protein transport	0.00715587
GO:BP	regulation of cysteine-type endopeptidase activity involved in apoptotic process	0.00744657
GO:BP	regulation of telomerase RNA localization to Cajal body	0.00761678
GO:BP	nucleolar large rRNA transcription by RNA polymerase I	0.00761678
GO:BP	cellular response to biotic stimulus	0.00788592
GO:BP	protein N-linked glycosylation	0.00811459
GO:BP	chromosome organization involved in meiotic cell cycle	0.00811459
GO:BP	mitochondrial ATP synthesis coupled electron transport	0.00812999
GO:BP	ATP synthesis coupled electron transport	0.00812999
GO:BP	negative regulation of cell activation	0.00819092
GO:BP	membrane organization	0.00835254
GO:BP	regulation of cellular protein catabolic process	0.00875383
GO:BP	response to inorganic substance	0.00892093
GO:BP	negative regulation of protein modification process	0.00930148
GO:BP	negative regulation of T cell activation	0.00935945
GO:BP	lymphocyte mediated immunity	0.00942956
GO:BP	snRNA metabolic process	0.00982551
GO:BP	production of molecular mediator of immune response	0.00999214
GO:BP	positive regulation of cell killing	0.0103061
GO:BP	neutrophil chemotaxis	0.01032
GO:BP	negative regulation of response to biotic stimulus	0.01032
GO:BP	negative regulation of leukocyte cell-cell adhesion	0.0103607
GO:BP	alcohol biosynthetic process	0.0103607
GO:BP	positive regulation of signal transduction	0.0103971
GO:BP	response to nitrogen compound	0.0104902
GO:BP	regulation of interferon-beta production	0.0107019
GO:BP	interferon-beta production	0.0107019
GO:BP	type I interferon signaling pathway	0.0107019
GO:BP	positive regulation of signaling	0.0109345
GO:BP	T cell proliferation	0.010998
GO:BP	regulation of cytokine-mediated signaling pathway	0.0110337
GO:BP	chromosome condensation	0.0110728
GO:BP	protein-DNA complex assembly	0.0111373
GO:BP	cellular aromatic compound metabolic process	0.0112359
GO:BP	positive regulation of viral genome replication	0.0112912
GO:BP	centromere complex assembly	0.0112912
GO:BP	regulation of response to cytokine stimulus	0.0113935
GO:BP	centrosome duplication	0.0116439
GO:BP	proteasome assembly	0.0120065
GO:BP	nuclear pore organization	0.0120065
GO:BP	positive regulation of DNA-dependent DNA replication	0.0120065
GO:BP	response to hypoxia	0.0120214
GO:BP	DNA-templated transcription, initiation	0.0120806
GO:BP	positive regulation of transcription of nucleolar large rRNA by RNA polymerase I	0.0121105
GO:BP	DNA methylation	0.0126012
GO:BP	DNA alkylation	0.0126012
GO:BP	regulation of intracellular transport	0.0126297
GO:BP	protein localization to nuclear body	0.0132127
GO:BP	protein localization to Cajal body	0.0132127
GO:BP	regulation of establishment of protein localization to chromosome	0.0132127
GO:BP	double-strand break repair via break-induced replication	0.0132127
GO:BP	establishment of protein localization to mitochondrial membrane	0.0133608
GO:BP	GMP metabolic process	0.0135542
GO:BP	monocyte chemotaxis	0.0135576
GO:BP	regulation of nucleocytoplasmic transport	0.0136717
GO:BP	signal transduction	0.0138726
GO:BP	regulation of multicellular organismal process	0.0144143
GO:BP	multicellular organismal process	0.0144281
GO:BP	negative regulation of signal transduction	0.0145036
GO:BP	positive regulation of cell communication	0.0149116
GO:BP	chemokine-mediated signaling pathway	0.0154232
GO:BP	myeloid cell differentiation	0.015963
GO:BP	purine nucleotide metabolic process	0.015963
GO:BP	lymphocyte proliferation	0.0160492
GO:BP	response to cadmium ion	0.016156
GO:BP	regulation of spindle organization	0.0162679
GO:BP	regulation of T cell mediated immunity	0.0171679
GO:BP	RNA phosphodiester bond hydrolysis, endonucleolytic	0.0171679
GO:BP	positive regulation of chromosome organization	0.0171679
GO:BP	viral transcription	0.0172874
GO:BP	positive regulation of cell cycle G2/M phase transition	0.017471
GO:BP	regulation of DNA binding	0.0179069
GO:BP	regulation of phosphorylation	0.0181385
GO:BP	protein acetylation	0.018643
GO:BP	positive regulation of cell activation	0.0193338
GO:BP	negative regulation of type I interferon-mediated signaling pathway	0.0196021
GO:BP	regulation of protein kinase activity	0.0204208
GO:BP	kinetochore organization	0.0204691
GO:BP	cellular response to heat	0.0211004
GO:BP	nucleoside metabolic process	0.0211004
GO:BP	homeostasis of number of cells	0.0212359
GO:BP	regulation of protein localization to nucleus	0.021312
GO:BP	purine-containing compound biosynthetic process	0.0216101
GO:BP	response to organonitrogen compound	0.0216863
GO:BP	response to UV	0.0219334
GO:BP	cellular response to oxygen-containing compound	0.0223231
GO:BP	Fc receptor signaling pathway	0.0232472
GO:BP	regulation of double-strand break repair	0.023513
GO:BP	regulation of type I interferon-mediated signaling pathway	0.0236532
GO:BP	leukocyte chemotaxis	0.0239169
GO:BP	cellular response to type I interferon	0.0240377
GO:BP	mononuclear cell migration	0.0250505
GO:BP	granulocyte migration	0.0254437
GO:BP	response to oxygen levels	0.0255756
GO:BP	response to decreased oxygen levels	0.0256041
GO:BP	maintenance of location	0.0256544
GO:BP	pyrimidine-containing compound metabolic process	0.0262317
GO:BP	positive regulation of cellular component organization	0.0263124
GO:BP	pyrimidine nucleotide metabolic process	0.0264218
GO:BP	DNA replication checkpoint signaling	0.0272936
GO:BP	purine nucleoside monophosphate metabolic process	0.0275953
GO:BP	mononuclear cell proliferation	0.0292717
GO:BP	transcription initiation from RNA polymerase II promoter	0.0298758
GO:BP	cellular response to chemokine	0.0298758
GO:BP	response to chemokine	0.0298758
GO:BP	double-strand break repair via nonhomologous end joining	0.0303604
GO:BP	ERAD pathway	0.0306987
GO:BP	homeostatic process	0.0319154
GO:BP	positive regulation of neuron death	0.0319457
GO:BP	somatic diversification of immune receptors	0.0323697
GO:BP	signal transduction by p53 class mediator	0.0324349
GO:BP	cell surface receptor signaling pathway	0.0326003
GO:BP	protein transmembrane transport	0.0328335
GO:BP	regulation of hydrolase activity	0.0336659
GO:BP	negative regulation of viral process	0.0338016
GO:BP	protein acylation	0.034741
GO:BP	microtubule-based process	0.0352861
GO:BP	activation of cysteine-type endopeptidase activity involved in apoptotic process	0.0358073
GO:BP	G-quadruplex DNA unwinding	0.0359084
GO:BP	meiotic chromosome condensation	0.0359084
GO:BP	histone H3-K9 dimethylation	0.0359084
GO:BP	deoxyribonucleotide biosynthetic process	0.0366857
GO:BP	deoxyribonucleoside triphosphate metabolic process	0.0366857
GO:BP	regulation of transcription of nucleolar large rRNA by RNA polymerase I	0.0366857
GO:BP	maturation of LSU-rRNA from tricistronic rRNA transcript (SSU-rRNA, 5.8S rRNA, LSU-rRNA)	0.0366857
GO:BP	regulation of cellular amino acid metabolic process	0.0372314
GO:BP	regulation of neuron apoptotic process	0.0375476
GO:BP	positive regulation of leukocyte activation	0.0375868
GO:BP	ncRNA transcription	0.0376031
GO:BP	regulation of protein transport	0.0379715
GO:BP	nucleobase-containing compound metabolic process	0.0388986
GO:BP	regulation of mitotic spindle organization	0.0405446
GO:BP	attachment of spindle microtubules to kinetochore	0.0405446
GO:BP	nucleoside diphosphate metabolic process	0.0412054
GO:BP	negative regulation of cellular component organization	0.042828
GO:BP	response to hydrogen peroxide	0.0431272
GO:BP	ncRNA catabolic process	0.0436164
GO:BP	DNA methylation or demethylation	0.0449027
GO:BP	response to organic cyclic compound	0.044911
GO:BP	positive regulation of lymphocyte differentiation	0.0455144
GO:BP	mRNA cleavage	0.0455298
GO:BP	mitochondrial RNA processing	0.0455298
GO:BP	nucleoside diphosphate phosphorylation	0.0456667
GO:BP	RNA surveillance	0.0467256
GO:BP	modulation by host of symbiont process	0.0471011
GO:BP	cellular response to molecule of bacterial origin	0.0487518
GO:BP	monosaccharide metabolic process	0.0496656
GO:BP	antigen receptor-mediated signaling pathway	0.0496656
GO:CC	nucleoplasm	3.31942e-153
GO:CC	cytoplasm	8.10795e-130
GO:CC	intracellular organelle lumen	7.94365e-109
GO:CC	membrane-enclosed lumen	9.50259e-109
GO:CC	organelle lumen	9.50259e-109
GO:CC	cytosol	1.28414e-107
GO:CC	nuclear lumen	1.08512e-84
GO:CC	intracellular membrane-bounded organelle	1.52071e-69
GO:CC	membrane-bounded organelle	5.93628e-61
GO:CC	catalytic complex	2.45702e-57
GO:CC	chromosome	9.01707e-52
GO:CC	intracellular organelle	3.7088e-47
GO:CC	intracellular anatomical structure	3.90823e-46
GO:CC	mitochondrion	4.16474e-46
GO:CC	organelle	1.89955e-42
GO:CC	envelope	2.90602e-39
GO:CC	organelle envelope	2.90602e-39
GO:CC	organelle membrane	4.51515e-32
GO:CC	chromosomal region	5.48897e-29
GO:CC	mitochondrial envelope	2.13441e-27
GO:CC	organelle inner membrane	2.71461e-27
GO:CC	mitochondrial protein-containing complex	6.0129e-27
GO:CC	intracellular protein-containing complex	8.28308e-27
GO:CC	mitochondrial inner membrane	1.10908e-26
GO:CC	mitochondrial membrane	1.32941e-25
GO:CC	condensed chromosome	4.10972e-25
GO:CC	transferase complex	7.45036e-24
GO:CC	endopeptidase complex	1.35302e-21
GO:CC	proteasome complex	1.79468e-21
GO:CC	mitochondrial matrix	2.68724e-21
GO:CC	nucleus	3.02526e-21
GO:CC	organellar ribosome	3.62339e-21
GO:CC	mitochondrial ribosome	3.62339e-21
GO:CC	endomembrane system	3.65793e-21
GO:CC	non-membrane-bounded organelle	1.18931e-20
GO:CC	intracellular non-membrane-bounded organelle	1.18931e-20
GO:CC	chromosome, centromeric region	4.79343e-20
GO:CC	preribosome	2.59548e-19
GO:CC	peptidase complex	3.68933e-19
GO:CC	nuclear body	1.31784e-18
GO:CC	vesicle	1.76272e-18
GO:CC	spliceosomal complex	1.89733e-18
GO:CC	extracellular exosome	1.00568e-17
GO:CC	nuclear chromosome	1.20374e-17
GO:CC	extracellular vesicle	3.00369e-17
GO:CC	extracellular membrane-bounded organelle	3.36954e-17
GO:CC	extracellular organelle	3.36954e-17
GO:CC	condensed chromosome, centromeric region	9.48585e-16
GO:CC	spindle	1.84463e-15
GO:CC	kinetochore	1.84587e-15
GO:CC	ficolin-1-rich granule	3.58892e-14
GO:CC	protein-containing complex	8.51068e-14
GO:CC	mitochondrial large ribosomal subunit	1.23792e-13
GO:CC	organellar large ribosomal subunit	1.23792e-13
GO:CC	U2-type spliceosomal complex	1.62892e-13
GO:CC	proteasome accessory complex	2.2737e-13
GO:CC	cytoplasmic vesicle	3.25055e-13
GO:CC	intracellular vesicle	3.92238e-13
GO:CC	endoplasmic reticulum subcompartment	6.79464e-13
GO:CC	nuclear outer membrane-endoplasmic reticulum membrane network	1.31968e-12
GO:CC	endoplasmic reticulum membrane	1.78607e-12
GO:CC	organelle subcompartment	1.86097e-12
GO:CC	transferase complex, transferring phosphorus-containing groups	4.72442e-12
GO:CC	ficolin-1-rich granule lumen	5.79086e-12
GO:CC	nuclear envelope	1.38361e-11
GO:CC	mitotic spindle	1.58511e-11
GO:CC	proteasome regulatory particle	2.34318e-11
GO:CC	U2-type precatalytic spliceosome	2.39233e-11
GO:CC	ribonucleoprotein granule	2.41514e-11
GO:CC	catalytic step 2 spliceosome	1.35918e-10
GO:CC	precatalytic spliceosome	1.50094e-10
GO:CC	chromatin	2.83183e-10
GO:CC	nuclear speck	6.22434e-10
GO:CC	nuclear pore	6.78001e-10
GO:CC	chromosome, telomeric region	7.75949e-10
GO:CC	nuclear periphery	1.38472e-09
GO:CC	small-subunit processome	2.962e-09
GO:CC	microtubule cytoskeleton	3.1536e-09
GO:CC	endoplasmic reticulum protein-containing complex	5.05404e-09
GO:CC	replication fork	6.049e-09
GO:CC	COPII-coated ER to Golgi transport vesicle	1.02317e-08
GO:CC	transcription regulator complex	1.16706e-08
GO:CC	supramolecular complex	1.93339e-08
GO:CC	pigment granule	1.98815e-08
GO:CC	melanosome	1.98815e-08
GO:CC	organellar small ribosomal subunit	2.76708e-08
GO:CC	mitochondrial small ribosomal subunit	2.76708e-08
GO:CC	centrosome	3.43215e-08
GO:CC	cytoplasmic ribonucleoprotein granule	3.97664e-08
GO:CC	fibrillar center	6.84739e-08
GO:CC	cytoplasmic vesicle lumen	7.28509e-08
GO:CC	endoplasmic reticulum	7.99377e-08
GO:CC	vesicle lumen	1.11904e-07
GO:CC	secretory granule lumen	1.82985e-07
GO:CC	secretory granule	1.83298e-07
GO:CC	membrane	2.94755e-07
GO:CC	mitochondrial nucleoid	5.24692e-07
GO:CC	nucleoid	5.24692e-07
GO:CC	bounding membrane of organelle	5.54103e-07
GO:CC	site of DNA damage	1.02037e-06
GO:CC	spindle pole	1.36836e-06
GO:CC	ER to Golgi transport vesicle membrane	1.39452e-06
GO:CC	methyltransferase complex	1.49161e-06
GO:CC	DNA-directed RNA polymerase complex	1.68053e-06
GO:CC	coated vesicle	1.71797e-06
GO:CC	RNA polymerase II transcription regulator complex	1.99788e-06
GO:CC	RNA polymerase complex	2.23905e-06
GO:CC	coated vesicle membrane	2.53881e-06
GO:CC	midbody	2.69349e-06
GO:CC	nuclear matrix	2.93105e-06
GO:CC	ribosomal subunit	3.02377e-06
GO:CC	chaperone complex	3.56553e-06
GO:CC	sno(s)RNA-containing ribonucleoprotein complex	3.56553e-06
GO:CC	nuclear DNA-directed RNA polymerase complex	3.69213e-06
GO:CC	site of double-strand break	3.75703e-06
GO:CC	cyclin-dependent protein kinase holoenzyme complex	4.85303e-06
GO:CC	preribosome, large subunit precursor	5.72218e-06
GO:CC	condensed nuclear chromosome	6.0313e-06
GO:CC	secretory vesicle	6.4282e-06
GO:CC	extracellular space	9.22622e-06
GO:CC	90S preribosome	1.25091e-05
GO:CC	inner mitochondrial membrane protein complex	1.69331e-05
GO:CC	proteasome core complex	2.1063e-05
GO:CC	nuclear membrane	2.10761e-05
GO:CC	U2-type catalytic step 2 spliceosome	2.23963e-05
GO:CC	nuclear replication fork	2.37978e-05
GO:CC	nuclear pore outer ring	4.99501e-05
GO:CC	CMG complex	4.99501e-05
GO:CC	replisome	5.83191e-05
GO:CC	microtubule organizing center	5.84562e-05
GO:CC	intrinsic component of organelle membrane	5.92551e-05
GO:CC	integral component of organelle membrane	7.2666e-05
GO:CC	vesicle membrane	8.96951e-05
GO:CC	DNA polymerase complex	9.64472e-05
GO:CC	DNA replication preinitiation complex	9.97611e-05
GO:CC	methylosome	9.97611e-05
GO:CC	proteasome regulatory particle, base subcomplex	9.97611e-05
GO:CC	heterochromatin	0.000132571
GO:CC	cytoplasmic stress granule	0.000182059
GO:CC	organelle envelope lumen	0.000184543
GO:CC	large ribosomal subunit	0.000196137
GO:CC	telomerase holoenzyme complex	0.000203007
GO:CC	cytoplasmic vesicle membrane	0.000228185
GO:CC	respiratory chain complex	0.000282102
GO:CC	vesicle coat	0.000330623
GO:CC	endoplasmic reticulum chaperone complex	0.000447093
GO:CC	cytoskeleton	0.000470503
GO:CC	focal adhesion	0.00050124
GO:CC	preribosome, small subunit precursor	0.0005093
GO:CC	mitochondrial intermembrane space	0.000509498
GO:CC	integral component of mitochondrial inner membrane	0.000522842
GO:CC	nuclear replisome	0.000694443
GO:CC	oxidoreductase complex	0.000706062
GO:CC	integral component of endoplasmic reticulum membrane	0.000773575
GO:CC	intrinsic component of mitochondrial inner membrane	0.000813358
GO:CC	mitochondrial respirasome	0.000830922
GO:CC	cell-substrate junction	0.000857237
GO:CC	exoribonuclease complex	0.00110603
GO:CC	perinuclear region of cytoplasm	0.00111364
GO:CC	proteasome regulatory particle, lid subcomplex	0.00118886
GO:CC	condensin complex	0.00118886
GO:CC	intrinsic component of mitochondrial membrane	0.00126167
GO:CC	U12-type spliceosomal complex	0.00154203
GO:CC	integral component of mitochondrial membrane	0.00191402
GO:CC	intrinsic component of endoplasmic reticulum membrane	0.00203601
GO:CC	tertiary granule	0.00217307
GO:CC	proteasome core complex, beta-subunit complex	0.00218375
GO:CC	respirasome	0.00224076
GO:CC	P-body	0.00234567
GO:CC	spindle microtubule	0.00332083
GO:CC	outer mitochondrial membrane protein complex	0.00348839
GO:CC	exosome (RNase complex)	0.00348839
GO:CC	mitochondrial outer membrane	0.00351247
GO:CC	organelle outer membrane	0.00372324
GO:CC	microtubule	0.00397705
GO:CC	secretory granule membrane	0.0049308
GO:CC	Golgi apparatus	0.004958
GO:CC	outer membrane	0.00521317
GO:CC	nuclear pore central transport channel	0.00579842
GO:CC	Golgi membrane	0.00581833
GO:CC	extracellular region	0.00654438
GO:CC	spindle midzone	0.00704286
GO:CC	primary lysosome	0.00723828
GO:CC	azurophil granule	0.00723828
GO:CC	nuclear ubiquitin ligase complex	0.00768987
GO:CC	Arp2/3 protein complex	0.00891956
GO:CC	mitochondrial outer membrane translocase complex	0.0107563
GO:CC	COPI-coated vesicle membrane	0.0111241
GO:CC	membrane coat	0.0144848
GO:CC	coated membrane	0.0144848
GO:CC	ubiquitin ligase complex	0.0150356
GO:CC	endoplasmic reticulum-Golgi intermediate compartment	0.0156954
GO:CC	nuclear exosome (RNase complex)	0.0158607
GO:CC	immunological synapse	0.018634
GO:CC	cytoplasmic exosome (RNase complex)	0.0219777
GO:CC	RNA polymerase II, holoenzyme	0.0243776
GO:CC	eukaryotic translation initiation factor 2B complex	0.0282756
GO:CC	cytolytic granule	0.029127
GO:CC	membrane protein complex	0.0296609
GO:CC	acetyltransferase complex	0.0316492
GO:CC	protein acetyltransferase complex	0.0316492
GO:CC	anchoring junction	0.0319971
GO:CC	chaperonin-containing T-complex	0.0358001
GO:CC	N-terminal protein acetyltransferase complex	0.0358001
GO:CC	serine/threonine protein kinase complex	0.0360676
GO:CC	Ctf18 RFC-like complex	0.0380654
GO:CC	histone methyltransferase complex	0.038604
GO:CC	rough endoplasmic reticulum membrane	0.0430209
GO:MF	protein binding	5.87828e-126
GO:MF	catalytic activity	2.16026e-39
GO:MF	enzyme binding	1.243e-31
GO:MF	nucleoside phosphate binding	1.63301e-31
GO:MF	nucleotide binding	2.57631e-31
GO:MF	small molecule binding	1.85316e-30
GO:MF	binding	5.81618e-29
GO:MF	catalytic activity, acting on a nucleic acid	7.07624e-28
GO:MF	purine nucleotide binding	2.17404e-26
GO:MF	purine ribonucleoside triphosphate binding	4.80202e-26
GO:MF	ribonucleotide binding	7.41546e-26
GO:MF	purine ribonucleotide binding	1.82865e-25
GO:MF	anion binding	2.82757e-24
GO:MF	ATP hydrolysis activity	2.32332e-23
GO:MF	adenyl nucleotide binding	3.1062e-23
GO:MF	ATP binding	1.19113e-22
GO:MF	adenyl ribonucleotide binding	2.02076e-22
GO:MF	carbohydrate derivative binding	3.69826e-21
GO:MF	hydrolase activity, acting on acid anhydrides	6.83579e-21
GO:MF	hydrolase activity, acting on acid anhydrides, in phosphorus-containing anhydrides	6.83579e-21
GO:MF	nucleoside-triphosphatase activity	1.14371e-20
GO:MF	pyrophosphatase activity	1.71632e-20
GO:MF	identical protein binding	1.09563e-19
GO:MF	ribonucleoprotein complex binding	1.538e-18
GO:MF	catalytic activity, acting on DNA	2.39729e-17
GO:MF	heterocyclic compound binding	9.59053e-17
GO:MF	organic cyclic compound binding	1.46029e-16
GO:MF	ATP-dependent activity	2.05676e-16
GO:MF	hydrolase activity	6.33641e-16
GO:MF	catalytic activity, acting on RNA	6.57125e-15
GO:MF	protein-containing complex binding	7.57095e-15
GO:MF	single-stranded DNA binding	4.08777e-13
GO:MF	DNA binding	7.60767e-13
GO:MF	ubiquitin-like protein ligase binding	1.15005e-12
GO:MF	ATP-dependent activity, acting on DNA	3.20916e-12
GO:MF	chromatin binding	7.6313e-12
GO:MF	cadherin binding	5.07198e-11
GO:MF	ubiquitin protein ligase binding	4.62332e-10
GO:MF	helicase activity	3.72977e-09
GO:MF	DNA helicase activity	2.21709e-08
GO:MF	single-stranded DNA helicase activity	2.75081e-08
GO:MF	unfolded protein binding	2.94917e-08
GO:MF	nuclease activity	3.16243e-08
GO:MF	magnesium ion binding	4.34921e-08
GO:MF	exonuclease activity	1.73943e-07
GO:MF	exonuclease activity, active with either ribo- or deoxyribonucleic acids and producing 5'-phosphomonoesters	2.84365e-07
GO:MF	ion binding	3.20669e-07
GO:MF	transferase activity	3.84758e-07
GO:MF	electron transfer activity	5.57763e-07
GO:MF	protein kinase binding	6.96967e-07
GO:MF	protein homodimerization activity	8.77926e-07
GO:MF	snoRNA binding	1.1154e-06
GO:MF	catalytic activity, acting on a protein	1.39587e-06
GO:MF	nucleotidyltransferase activity	1.56609e-06
GO:MF	DNA secondary structure binding	1.73228e-06
GO:MF	nucleic acid binding	2.0376e-06
GO:MF	protein dimerization activity	2.10184e-06
GO:MF	transcription factor binding	2.13131e-06
GO:MF	translation regulator activity	2.58484e-06
GO:MF	double-stranded RNA binding	3.36692e-06
GO:MF	cell adhesion molecule binding	6.8294e-06
GO:MF	transferase activity, transferring phosphorus-containing groups	6.8379e-06
GO:MF	ribosome binding	8.94935e-06
GO:MF	mRNA binding	9.11105e-06
GO:MF	kinase binding	9.42003e-06
GO:MF	structural constituent of nuclear pore	1.50161e-05
GO:MF	damaged DNA binding	1.78312e-05
GO:MF	histone binding	2.00304e-05
GO:MF	3'-5' exonuclease activity	2.5802e-05
GO:MF	translation regulator activity, nucleic acid binding	3.18179e-05
GO:MF	translation factor activity, RNA binding	5.66895e-05
GO:MF	DNA polymerase binding	8.67117e-05
GO:MF	four-way junction DNA binding	9.59445e-05
GO:MF	disulfide oxidoreductase activity	0.000138824
GO:MF	ribonuclease activity	0.000176188
GO:MF	protein folding chaperone	0.000201118
GO:MF	signal sequence binding	0.000209306
GO:MF	isomerase activity	0.000223463
GO:MF	ubiquitin-like protein conjugating enzyme activity	0.000419457
GO:MF	histone deacetylase binding	0.000436773
GO:MF	exoribonuclease activity	0.000541592
GO:MF	protein domain specific binding	0.000680761
GO:MF	heat shock protein binding	0.000721372
GO:MF	exoribonuclease activity, producing 5'-phosphomonoesters	0.000788949
GO:MF	single-stranded RNA binding	0.000833695
GO:MF	ATP-dependent activity, acting on RNA	0.000862707
GO:MF	general transcription initiation factor binding	0.000993675
GO:MF	translation initiation factor activity	0.00114888
GO:MF	amide binding	0.00161619
GO:MF	ubiquitin conjugating enzyme activity	0.00166559
GO:MF	oxidoreductase activity, acting on a sulfur group of donors	0.0017858
GO:MF	DNA-directed 5'-3' RNA polymerase activity	0.00291062
GO:MF	3'-5'-exoribonuclease activity	0.00308188
GO:MF	RNA polymerase activity	0.00325066
GO:MF	5'-3' RNA polymerase activity	0.00325066
GO:MF	nucleocytoplasmic carrier activity	0.00348291
GO:MF	protein-disulfide reductase activity	0.00372604
GO:MF	GTPase binding	0.00374326
GO:MF	RNA helicase activity	0.00386176
GO:MF	DNA replication origin binding	0.00428487
GO:MF	G-quadruplex DNA binding	0.00439644
GO:MF	threonine-type endopeptidase activity	0.0049133
GO:MF	GDP binding	0.0058367
GO:MF	TBP-class protein binding	0.00717715
GO:MF	nuclear localization sequence binding	0.00717715
GO:MF	translation initiation factor binding	0.00811644
GO:MF	iron-sulfur cluster binding	0.00830173
GO:MF	metal cluster binding	0.00830173
GO:MF	monosaccharide binding	0.00830173
GO:MF	exodeoxyribonuclease activity	0.0102198
GO:MF	exodeoxyribonuclease activity, producing 5'-phosphomonoesters	0.0102198
GO:MF	snRNP binding	0.0113405
GO:MF	NF-kappaB binding	0.0119736
GO:MF	chaperone binding	0.0142728
GO:MF	RNA polymerase II general transcription initiation factor activity	0.015908
GO:MF	pseudouridine synthase activity	0.0176803
GO:MF	nucleosome binding	0.0185084
GO:MF	protein N-terminus binding	0.0185394
GO:MF	oxidoreductase activity	0.0192745
GO:MF	MHC protein complex binding	0.020928
GO:MF	proteasome binding	0.0278778
GO:MF	ubiquitin-like protein binding	0.0279843
GO:MF	cyclin-dependent protein serine/threonine kinase regulator activity	0.0292974
GO:MF	MHC class I protein binding	0.042326
GO:MF	catalytic activity, acting on a tRNA	0.0476908
HP	Abnormality of blood and blood-forming tissues	3.16921e-10
HP	Intrauterine growth retardation	5.71989e-10
HP	Anemia	2.19977e-09
HP	Abnormal cerebral morphology	4.65061e-09
HP	Abnormal erythrocyte morphology	4.8107e-09
HP	Abnormal leukocyte morphology	1.17361e-08
HP	Abnormal cellular immune system morphology	1.17361e-08
HP	Abnormality of forebrain morphology	1.39107e-08
HP	Abnormal immune system morphology	3.22696e-08
HP	Aplasia/Hypoplasia of the cerebrum	6.62467e-08
HP	Decreased head circumference	8.96792e-08
HP	Aplasia/Hypoplasia involving the central nervous system	8.99564e-08
HP	Microcephaly	1.45195e-07
HP	Abnormal cellular physiology	1.69805e-07
HP	Hematological neoplasm	1.71891e-07
HP	Abnormal cellular phenotype	4.56992e-07
HP	Multiple cafe-au-lait spots	5.82911e-07
HP	Abnormality of skull size	1.56317e-06
HP	Pyridoxine-responsive sideroblastic anemia	3.1647e-06
HP	Morphological central nervous system abnormality	4.29729e-06
HP	Decreased body weight	6.21666e-06
HP	Increased serum lactate	7.48451e-06
HP	Abnormal leukocyte count	8.15027e-06
HP	Abnormality of metabolism/homeostasis	1.1136e-05
HP	Abnormal abdomen morphology	2.01461e-05
HP	Abnormality of the liver	2.79024e-05
HP	Abnormality of chromosome stability	4.06923e-05
HP	Absent testis	5.36177e-05
HP	Sideroblastic anemia	5.68369e-05
HP	Growth abnormality	8.90099e-05
HP	Myelodysplasia	9.076e-05
HP	Cafe-au-lait spot	0.000104968
HP	Abnormality of brain morphology	0.00015081
HP	Duodenal stenosis	0.000175822
HP	Small intestinal stenosis	0.000175822
HP	Abnormality of the digestive system	0.000225268
HP	Hypertrophic cardiomyopathy	0.000272995
HP	Simplified gyral pattern	0.00028319
HP	Sloping forehead	0.000290306
HP	Abnormal nervous system morphology	0.000314811
HP	Global developmental delay	0.000467274
HP	Visceromegaly	0.000487149
HP	Clubbing of toes	0.00120017
HP	Abnormality of the abdominal organs	0.00140646
HP	Aplasia/Hypoplasia of the uvula	0.00144134
HP	Acute phase response	0.00170228
HP	Tracheoesophageal fistula	0.00211009
HP	Irregular hyperpigmentation	0.0022506
HP	Thrombocytopenia	0.00324013
HP	Abnormal thrombocyte morphology	0.00336211
HP	Abnormal myeloid leukocyte morphology	0.00343567
HP	Abnormality of digestive system physiology	0.0037345
HP	Hepatomegaly	0.00409314
HP	Abnormal myelination	0.00409433
HP	Hypermelanotic macule	0.00430686
HP	Hyperpigmentation of the skin	0.00431118
HP	Fever	0.00479277
HP	Immunodeficiency	0.00539347
HP	Abnormality of the lymph nodes	0.00559851
HP	Choanal atresia	0.00605687
HP	Abnormal CSF metabolite level	0.00605687
HP	Abnormal platelet count	0.00640903
HP	Abnormality of the choanae	0.012399
HP	Abnormal preputium morphology	0.0126586
HP	Almond-shaped palpebral fissure	0.0137184
HP	Abnormal granulocyte morphology	0.0138688
HP	Pancytopenia	0.0141747
HP	Lymphadenopathy	0.0146778
HP	Abnormal homeostasis	0.0156146
HP	Abnormality of B cell physiology	0.0169305
HP	Abnormal liver morphology	0.0215615
HP	Abnormal granulocyte count	0.0245226
HP	Abnormality of skeletal morphology	0.0247369
HP	Abnormal immunoglobulin level	0.0257666
HP	Abnormality of multiple cell lineages in the bone marrow	0.0258494
HP	Macule	0.0295361
HP	Tetraplegia/tetraparesis	0.0302299
HP	Bicornuate uterus	0.0305905
HP	Lymphoma	0.0313129
HP	Failure to thrive	0.0326816
HP	Hyperreflexia	0.0342986
HP	Abnormality of the musculoskeletal system	0.0345798
HP	Hypopigmented skin patches	0.0351952
HP	Abnormal lymphocyte physiology	0.0355509
HP	Abnormal leukocyte physiology	0.0355509
HP	Abnormal lymphocyte morphology	0.0406256
HP	Abnormality of body weight	0.0421877
HP	Abnormality of acid-base homeostasis	0.0432154
HP	Hypoalbuminemia	0.0481425
HP	Abnormal duodenum morphology	0.0482505
HP	Elevated erythrocyte sedimentation rate	0.049934
HPA	lymph node	3.29199e-81
HPA	tonsil; germinal center cells[≥Low]	8.48443e-78
HPA	tonsil	2.49244e-76
HPA	tonsil; non-germinal center cells[≥Low]	2.27701e-70
HPA	lymph node; non-germinal center cells[≥Low]	3.42636e-69
HPA	lymph node; germinal center cells[≥Low]	2.34894e-63
HPA	tonsil; germinal center cells[≥Medium]	2.00323e-62
HPA	appendix	3.53323e-60
HPA	bone marrow	3.3678e-59
HPA	bone marrow; hematopoietic cells[≥Low]	3.3678e-59
HPA	spleen	1.32598e-57
HPA	oral mucosa; squamous epithelial cells[≥Low]	6.76454e-56
HPA	oral mucosa	6.76454e-56
HPA	lymph node; germinal center cells[≥Medium]	1.11621e-55
HPA	placenta	1.13995e-54
HPA	esophagus; squamous epithelial cells[≥Low]	7.69188e-53
HPA	esophagus	7.69188e-53
HPA	tonsil; squamous epithelial cells[≥Low]	2.22574e-52
HPA	appendix; lymphoid tissue[≥Low]	8.20066e-51
HPA	bone marrow; hematopoietic cells[≥Medium]	4.99526e-49
HPA	tonsil; non-germinal center cells[≥Medium]	6.71915e-49
HPA	lymph node; non-germinal center cells[≥Medium]	7.96165e-49
HPA	spleen; cells in white pulp[≥Low]	6.25164e-48
HPA	breast; glandular cells[≥Low]	9.07071e-47
HPA	urinary bladder; urothelial cells[≥Low]	1.7117e-45
HPA	urinary bladder	1.7117e-45
HPA	tonsil; squamous epithelial cells[≥Medium]	5.32754e-45
HPA	spleen; cells in red pulp[≥Low]	5.89361e-45
HPA	skin 2	6.16953e-45
HPA	duodenum	2.04967e-44
HPA	lung	7.20771e-44
HPA	rectum	6.86802e-43
HPA	duodenum; glandular cells[≥Medium]	3.20338e-42
HPA	colon; glandular cells[≥Low]	7.4855e-41
HPA	breast	1.33283e-40
HPA	urinary bladder; urothelial cells[≥Medium]	2.2403e-40
HPA	small intestine	2.52256e-40
HPA	esophagus; squamous epithelial cells[≥Medium]	4.86603e-40
HPA	cervix	5.48512e-40
HPA	appendix; glandular cells[≥Medium]	1.03626e-39
HPA	colon; glandular cells[≥Medium]	1.69804e-39
HPA	lung; macrophages[≥Low]	2.56665e-39
HPA	oral mucosa; squamous epithelial cells[≥Medium]	3.61852e-39
HPA	rectum; glandular cells[≥Medium]	7.13511e-39
HPA	endometrium 1; glandular cells[≥Low]	7.69278e-39
HPA	skin 1	1.44075e-38
HPA	stomach 2; glandular cells[≥Medium]	2.20439e-38
HPA	rectum; glandular cells[≥Low]	1.19843e-37
HPA	vagina; squamous epithelial cells[≥Low]	1.28903e-37
HPA	vagina	1.28903e-37
HPA	skin 2; lymphocytes[≥Low]	1.42704e-37
HPA	appendix; glandular cells[≥Low]	2.14007e-37
HPA	skin 2; cells in basal layer[≥Low]	2.65866e-37
HPA	duodenum; glandular cells[≥Low]	4.34958e-37
HPA	skin 2; cells in basal layer[≥Medium]	1.86858e-36
HPA	appendix; lymphoid tissue[≥Medium]	2.47946e-36
HPA	endometrium 2; glandular cells[≥Low]	3.2409e-36
HPA	cervix; glandular cells[≥Low]	1.12577e-35
HPA	stomach 1; glandular cells[≥Low]	1.17223e-35
HPA	stomach 1	1.17223e-35
HPA	breast; glandular cells[≥Medium]	2.87953e-35
HPA	endometrium 1	3.35519e-35
HPA	gallbladder; glandular cells[≥Low]	4.09835e-35
HPA	gallbladder	4.09835e-35
HPA	stomach 2	6.05889e-35
HPA	stomach 2; glandular cells[≥Low]	6.05889e-35
HPA	small intestine; glandular cells[≥Low]	1.27109e-34
HPA	stomach 1; glandular cells[≥Medium]	2.05892e-34
HPA	pancreas; exocrine glandular cells[≥Low]	2.13102e-34
HPA	placenta; trophoblastic cells[≥Low]	9.1322e-34
HPA	small intestine; glandular cells[≥Medium]	9.18259e-34
HPA	skin 1; cells in basal layer[≥Low]	1.2122e-33
HPA	gallbladder; glandular cells[≥Medium]	1.38267e-33
HPA	thyroid gland	2.28587e-33
HPA	thyroid gland; glandular cells[≥Low]	2.28587e-33
HPA	skin 2; cells in spinous layer[≥Low]	6.04565e-33
HPA	colon	7.54086e-33
HPA	endometrium 2	8.1647e-33
HPA	pancreas; exocrine glandular cells[≥Medium]	8.27799e-33
HPA	skin 2; lymphocytes[≥Medium]	3.26689e-32
HPA	cervix; squamous epithelial cells[≥Low]	3.9065e-32
HPA	prostate	5.13017e-32
HPA	prostate; glandular cells[≥Low]	5.13017e-32
HPA	skin 2; langerhans cells[≥Low]	5.25119e-32
HPA	skin 1; langerhans cells[≥Low]	3.2196e-31
HPA	rectum; glandular cells[High]	7.90773e-31
HPA	skin 1; cells in spinous layer[≥Low]	9.32074e-31
HPA	adrenal gland; glandular cells[≥Medium]	5.63192e-30
HPA	seminal vesicle; glandular cells[≥Low]	1.51875e-29
HPA	seminal vesicle	1.51875e-29
HPA	endometrium 1; glandular cells[≥Medium]	1.71391e-29
HPA	spleen; cells in white pulp[≥Medium]	2.05683e-29
HPA	pancreas	2.70255e-29
HPA	vagina; squamous epithelial cells[≥Medium]	3.06293e-29
HPA	skin 2; langerhans cells[≥Medium]	6.14981e-29
HPA	salivary gland; glandular cells[≥Low]	8.33324e-29
HPA	salivary gland	8.33324e-29
HPA	skin 2; cells in spinous layer[≥Medium]	1.2399e-28
HPA	adrenal gland; glandular cells[≥Low]	1.86892e-28
HPA	skin 1; cells in basal layer[≥Medium]	2.32899e-28
HPA	adrenal gland	4.98884e-28
HPA	endometrium 2; glandular cells[≥Medium]	5.10305e-28
HPA	prostate; glandular cells[≥Medium]	5.38711e-28
HPA	fallopian tube	9.08569e-28
HPA	skin 2; fibrohistiocytic cells[≥Low]	1.56313e-27
HPA	skin 1; melanocytes[≥Low]	1.72776e-27
HPA	testis; spermatogonia cells[≥Low]	2.1036e-27
HPA	placenta; trophoblastic cells[≥Medium]	5.18063e-27
HPA	lung; alveolar cells type II[≥Low]	5.36671e-27
HPA	skin 2; endothelial cells[≥Low]	6.37793e-27
HPA	epididymis; glandular cells[≥Low]	9.83634e-27
HPA	epididymis	9.83634e-27
HPA	bronchus	1.13924e-26
HPA	skin 1; langerhans cells[≥Medium]	1.21224e-26
HPA	skin 1; lymphocytes[≥Low]	1.49842e-26
HPA	ovary	1.79372e-26
HPA	pancreas; pancreatic endocrine cells[≥Low]	2.43685e-26
HPA	placenta; decidual cells[≥Low]	3.48047e-26
HPA	testis	6.38232e-26
HPA	nasopharynx	8.69801e-26
HPA	parathyroid gland	1.30738e-25
HPA	parathyroid gland; glandular cells[≥Low]	1.30738e-25
HPA	testis; spermatogonia cells[High]	1.46997e-25
HPA	spleen; cells in red pulp[≥Medium]	1.56558e-25
HPA	endometrium 1; cells in endometrial stroma[≥Low]	1.81102e-25
HPA	testis; spermatogonia cells[≥Medium]	4.15223e-25
HPA	breast; myoepithelial cells[≥Low]	6.47604e-25
HPA	skin 1; cells in spinous layer[≥Medium]	6.97108e-25
HPA	lung; macrophages[≥Medium]	1.19489e-24
HPA	cervix; glandular cells[≥Medium]	1.85125e-24
HPA	skin 2; melanocytes[≥Low]	2.16715e-24
HPA	kidney	5.41753e-24
HPA	skin 2; fibrohistiocytic cells[≥Medium]	7.53665e-24
HPA	bronchus; respiratory epithelial cells[≥Low]	1.0438e-23
HPA	cervix; squamous epithelial cells[≥Medium]	1.05471e-23
HPA	fallopian tube; glandular cells[≥Low]	1.11468e-23
HPA	tonsil; germinal center cells[High]	1.2321e-23
HPA	hippocampus; neuronal cells[≥Low]	3.26153e-23
HPA	duodenum; glandular cells[High]	5.37247e-23
HPA	lymph node; germinal center cells[High]	5.95287e-23
HPA	cerebral cortex; neuronal cells[≥Low]	7.84683e-23
HPA	skin 1; endothelial cells[≥Low]	8.62278e-23
HPA	nasopharynx; respiratory epithelial cells[≥Low]	1.51181e-22
HPA	skin 2; melanocytes[≥Medium]	3.42405e-22
HPA	salivary gland; glandular cells[≥Medium]	3.68778e-22
HPA	esophagus; squamous epithelial cells[High]	3.77884e-22
HPA	fallopian tube; glandular cells[≥Medium]	4.06791e-22
HPA	skin 1; fibrohistiocytic cells[≥Low]	4.70805e-22
HPA	colon; glandular cells[High]	5.49287e-22
HPA	skin 1; lymphocytes[≥Medium]	6.46843e-22
HPA	cerebellum; Purkinje cells[≥Low]	1.12094e-21
HPA	epididymis; glandular cells[≥Medium]	1.3294e-21
HPA	bronchus; respiratory epithelial cells[≥Medium]	1.54619e-21
HPA	lung; alveolar cells type I[≥Low]	2.78582e-21
HPA	lung; alveolar cells type II[≥Medium]	3.66442e-21
HPA	placenta; decidual cells[≥Medium]	3.72419e-21
HPA	bone marrow; hematopoietic cells[High]	6.03558e-21
HPA	skin 1; melanocytes[≥Medium]	7.87181e-21
HPA	skin 2; lymphocytes[High]	8.2358e-21
HPA	thyroid gland; glandular cells[≥Medium]	1.40285e-20
HPA	hippocampus	2.71058e-20
HPA	ovary; ovarian stroma cells[≥Low]	3.12869e-20
HPA	hippocampus; neuronal cells[≥Medium]	3.1308e-20
HPA	urinary bladder; urothelial cells[High]	9.59133e-20
HPA	seminal vesicle; glandular cells[≥Medium]	1.34393e-19
HPA	soft tissue 2; fibroblasts[≥Low]	2.20696e-19
HPA	liver	2.96331e-19
HPA	skin 1; fibrohistiocytic cells[≥Medium]	2.98787e-19
HPA	cerebellum; Purkinje cells[≥Medium]	3.16843e-19
HPA	nasopharynx; respiratory epithelial cells[≥Medium]	5.65689e-19
HPA	kidney; cells in tubules[≥Low]	9.45947e-19
HPA	parathyroid gland; glandular cells[≥Medium]	1.262e-18
HPA	soft tissue 2	1.8976e-18
HPA	liver; cholangiocytes[≥Low]	2.08882e-18
HPA	skin 2; cells in granular layer[≥Low]	2.32643e-18
HPA	liver; hepatocytes[≥Low]	2.57799e-18
HPA	skin 2; endothelial cells[≥Medium]	2.96843e-18
HPA	soft tissue 1	3.11884e-18
HPA	soft tissue 1; fibroblasts[≥Low]	3.48014e-18
HPA	testis; preleptotene spermatocytes[≥Low]	3.80579e-18
HPA	tonsil; squamous epithelial cells[High]	4.40477e-18
HPA	breast; adipocytes[≥Low]	4.44082e-18
HPA	cerebral cortex; neuronal cells[≥Medium]	7.91812e-18
HPA	cerebellum; cells in molecular layer[≥Low]	9.85879e-18
HPA	lymph node; non-germinal center cells[High]	1.93186e-17
HPA	lung; alveolar cells type I[≥Medium]	2.61297e-17
HPA	adipose tissue	2.95851e-17
HPA	adipose tissue; adipocytes[≥Low]	2.95851e-17
HPA	breast; myoepithelial cells[≥Medium]	4.56764e-17
HPA	testis; preleptotene spermatocytes[≥Medium]	4.94174e-17
HPA	caudate	5.57057e-17
HPA	testis; pachytene spermatocytes[High]	7.59886e-17
HPA	skin 1; cells in granular layer[≥Low]	8.71803e-17
HPA	skin 2; cells in basal layer[High]	1.33832e-16
HPA	testis; pachytene spermatocytes[≥Medium]	1.944e-16
HPA	caudate; neuronal cells[≥Low]	1.96035e-16
HPA	testis; preleptotene spermatocytes[High]	2.43848e-16
HPA	cerebral cortex; glial cells[≥Low]	2.70232e-16
HPA	lung; endothelial cells[≥Low]	3.75435e-16
HPA	cerebellum	4.18029e-16
HPA	skin 1; lymphocytes[High]	4.66564e-16
HPA	testis; Leydig cells[≥Low]	6.56323e-16
HPA	testis; pachytene spermatocytes[≥Low]	9.59056e-16
HPA	oral mucosa; squamous epithelial cells[High]	1.03211e-15
HPA	endometrium 2; cells in endometrial stroma[≥Low]	1.06253e-15
HPA	pancreas; pancreatic endocrine cells[≥Medium]	1.12293e-15
HPA	appendix; glandular cells[High]	1.51573e-15
HPA	caudate; neuronal cells[≥Medium]	2.25835e-15
HPA	skin 1; endothelial cells[≥Medium]	2.8425e-15
HPA	small intestine; glandular cells[High]	4.42484e-15
HPA	skin 2; cells in granular layer[≥Medium]	5.39439e-15
HPA	skin 2; epidermal cells[≥Medium]	1.2705e-14
HPA	lung; alveolar cells type II[High]	2.36931e-14
HPA	skin 2; melanocytes[High]	2.40851e-14
HPA	skin 1; fibrohistiocytic cells[High]	8.11264e-14
HPA	cerebral cortex	9.41483e-14
HPA	tonsil; non-germinal center cells[High]	1.33626e-13
HPA	testis; Leydig cells[≥Medium]	1.33952e-13
HPA	kidney; cells in glomeruli[≥Low]	1.3604e-13
HPA	stomach 2; glandular cells[High]	1.50416e-13
HPA	skin 2; fibrohistiocytic cells[High]	1.72847e-13
HPA	skin 2; langerhans cells[High]	3.12287e-13
HPA	kidney; cells in tubules[≥Medium]	3.19694e-13
HPA	seminal vesicle; glandular cells[High]	3.85936e-13
HPA	pancreas; exocrine glandular cells[High]	4.30482e-13
HPA	endometrium 2; glandular cells[High]	4.71623e-13
HPA	endometrium 1; glandular cells[High]	5.22629e-13
HPA	lung; endothelial cells[≥Medium]	5.46239e-13
HPA	stomach 1; glandular cells[High]	6.42588e-13
HPA	skin 1; cells in granular layer[≥Medium]	1.17494e-12
HPA	colon; endothelial cells[≥Low]	2.03349e-12
HPA	testis; sertoli cells[≥Low]	5.70953e-12
HPA	placenta; decidual cells[High]	5.78886e-12
HPA	caudate; glial cells[≥Low]	1.33203e-11
HPA	heart muscle	1.34346e-11
HPA	heart muscle; cardiomyocytes[≥Low]	1.34346e-11
HPA	hippocampus; glial cells[≥Low]	1.66006e-11
HPA	skeletal muscle; myocytes[≥Low]	2.41034e-11
HPA	skeletal muscle	2.41034e-11
HPA	endometrium 1; cells in endometrial stroma[≥Medium]	2.49025e-11
HPA	lung; alveolar cells type I[High]	2.63382e-11
HPA	smooth muscle	2.94227e-11
HPA	smooth muscle; smooth muscle cells[≥Low]	2.94227e-11
HPA	soft tissue 1; fibroblasts[≥Medium]	3.69954e-11
HPA	breast; glandular cells[High]	5.1435e-11
HPA	skin 2; cells in spinous layer[High]	5.24006e-11
HPA	colon; peripheral nerve/ganglion[≥Low]	6.03817e-11
HPA	cerebral cortex; endothelial cells[≥Low]	6.18292e-11
HPA	liver; hepatocytes[≥Medium]	6.27885e-11
HPA	bronchus; respiratory epithelial cells[High]	6.68722e-11
HPA	cerebellum; Purkinje cells[High]	1.33009e-10
HPA	gallbladder; glandular cells[High]	1.4385e-10
HPA	soft tissue 1; chondrocytes[≥Low]	1.44509e-10
HPA	ovary; follicle cells[≥Low]	2.22916e-10
HPA	soft tissue 2; peripheral nerve[≥Low]	6.38006e-10
HPA	skin 1; langerhans cells[High]	6.68648e-10
HPA	cerebellum; cells in molecular layer[≥Medium]	9.43534e-10
HPA	cervix; squamous epithelial cells[High]	1.33302e-09
HPA	spleen; cells in white pulp[High]	1.86767e-09
HPA	appendix; lymphoid tissue[High]	1.88417e-09
HPA	skin 2; epidermal cells[≥Low]	2.45762e-09
HPA	colon; peripheral nerve/ganglion[≥Medium]	2.51225e-09
HPA	epididymis; glandular cells[High]	3.86344e-09
HPA	skin 1; keratinocytes[≥Low]	4.19875e-09
HPA	skin 1; Langerhans[≥Low]	4.31222e-09
HPA	nasopharynx; respiratory epithelial cells[High]	7.78762e-09
HPA	breast; adipocytes[≥Medium]	1.20561e-08
HPA	placenta; trophoblastic cells[High]	1.20815e-08
HPA	salivary gland; glandular cells[High]	1.74891e-08
HPA	ovary; follicle cells[≥Medium]	2.09139e-08
HPA	skin 1; keratinocytes[≥Medium]	2.63665e-08
HPA	cerebellum; cells in granular layer[≥Low]	2.99367e-08
HPA	skin 2; epidermal cells[High]	3.86032e-08
HPA	thyroid gland; glandular cells[High]	4.64677e-08
HPA	adrenal gland; glandular cells[High]	6.52954e-08
HPA	soft tissue 1; peripheral nerve[≥Low]	7.02056e-08
HPA	soft tissue 2; fibroblasts[≥Medium]	1.60856e-07
HPA	skin 1; cells in spinous layer[High]	1.70847e-07
HPA	skin 2; cells in granular layer[High]	1.7506e-07
HPA	skin 2; endothelial cells[High]	1.76249e-07
HPA	skin 2; vascular mural cells[≥Low]	1.89682e-07
HPA	vagina; squamous epithelial cells[High]	2.31119e-07
HPA	appendix; non-germinal center cells[≥Medium]	2.44085e-07
HPA	fallopian tube; glandular cells[High]	2.49537e-07
HPA	skin 1; Langerhans[≥Medium]	2.6033e-07
HPA	cerebral cortex; glial cells[≥Medium]	2.75065e-07
HPA	skin 1; hair follicles[≥Medium]	4.12339e-07
HPA	lung; endothelial cells[High]	4.12339e-07
HPA	skin 1; sebaceous glands[≥Low]	4.7737e-07
HPA	parathyroid gland; glandular cells[High]	5.82687e-07
HPA	placenta; hofbauer cells[≥Medium]	6.07818e-07
HPA	ovary; ovarian stroma cells[≥Medium]	6.21811e-07
HPA	skin 1; melanocytes[High]	9.05309e-07
HPA	hippocampus; glial cells[≥Medium]	9.29229e-07
HPA	liver; cholangiocytes[≥Medium]	9.52227e-07
HPA	skin 2; vascular mural cells[≥Medium]	1.5179e-06
HPA	endometrium 2; cells in endometrial stroma[≥Medium]	1.81499e-06
HPA	testis; Leydig cells[High]	2.07633e-06
HPA	testis; sertoli cells[≥Medium]	2.4392e-06
HPA	appendix; non-germinal center cells[≥Low]	3.36719e-06
HPA	skin 1; endothelial cells[High]	3.63244e-06
HPA	placenta; cytotrophoblasts[≥Medium]	3.73365e-06
HPA	kidney; cells in tubules[High]	4.18157e-06
HPA	prostate; glandular cells[High]	4.23456e-06
HPA	placenta; cytotrophoblasts[≥Low]	4.47496e-06
HPA	spleen; cells in red pulp[High]	4.67023e-06
HPA	testis; sertoli cells[High]	5.31609e-06
HPA	skin 1; cells in basal layer[High]	6.26197e-06
HPA	breast; myoepithelial cells[High]	6.31409e-06
HPA	colon; endothelial cells[≥Medium]	7.85841e-06
HPA	skin 1; vascular mural cells[≥Medium]	7.87438e-06
HPA	skin 1; vascular mural cells[≥Low]	8.19929e-06
HPA	placenta; hofbauer cells[High]	8.43629e-06
HPA	skin 1; cells in granular layer[High]	8.98398e-06
HPA	skin 1; sebaceous glands[≥Medium]	9.05051e-06
HPA	skin 1; hair follicles[≥Low]	9.2223e-06
HPA	kidney; cells in glomeruli[≥Medium]	1.37463e-05
HPA	adipose tissue; adipocytes[≥Medium]	1.41096e-05
HPA	placenta; hofbauer cells[≥Low]	1.7591e-05
HPA	placenta; cytotrophoblasts[High]	2.35972e-05
HPA	skin 2; eccrine glands[≥Low]	2.88197e-05
HPA	colon; mucosal lymphoid cells[High]	2.88269e-05
HPA	lung; macrophages[High]	3.50312e-05
HPA	skin 1; eccrine glands[≥Low]	3.7402e-05
HPA	rectum; mucosal lymphoid cells[High]	5.28468e-05
HPA	cerebral cortex; neuronal cells[High]	8.57324e-05
HPA	skin 1; vascular mural cells[High]	0.000118545
HPA	heart muscle; cardiomyocytes[≥Medium]	0.000126971
HPA	placenta; syncytiotrophoblasts - cell body[High]	0.000219244
HPA	skin 2; vascular mural cells[High]	0.000237987
HPA	skin 1; eccrine glands[≥Medium]	0.000249411
HPA	rectum; enterocytes[≥Medium]	0.000252503
HPA	testis; round or early spermatids[≥Medium]	0.00032434
HPA	skin 2; hair follicles[≥Medium]	0.000324342
HPA	caudate; glial cells[≥Medium]	0.000329948
HPA	skin 1; sebaceous glands[High]	0.000352436
HPA	testis; round or early spermatids[High]	0.000600788
HPA	soft tissue 1; chondrocytes[≥Medium]	0.000743214
HPA	cervix; glandular cells[High]	0.000825166
HPA	cerebellum; cells in granular layer[≥Medium]	0.00124557
HPA	skeletal muscle; myocytes[≥Medium]	0.0018092
HPA	soft tissue 1; peripheral nerve[≥Medium]	0.00194908
HPA	hippocampus; neuronal cells[High]	0.00249266
HPA	placenta; syncytiotrophoblasts - cell body[≥Low]	0.00299971
HPA	skin 2; hair follicles[≥Low]	0.0030805
HPA	skin 2; eccrine glands[≥Medium]	0.00335298
HPA	fallopian tube; non-ciliated cells[≥Medium]	0.00360521
HPA	soft tissue 1; fibroblasts[High]	0.00374801
HPA	duodenum; enterocytes[≥Medium]	0.00376246
HPA	appendix; enterocytes[≥Medium]	0.00377734
HPA	pancreas; pancreatic endocrine cells[High]	0.00413851
HPA	placenta; syncytiotrophoblasts - cell body[≥Medium]	0.00493214
HPA	cerebral cortex; endothelial cells[≥Medium]	0.00547431
HPA	caudate; neuronal cells[High]	0.00575201
HPA	appendix; germinal center cells[≥Medium]	0.00674465
HPA	ovary; follicle cells[High]	0.00920894
HPA	skin 1; eccrine glands[High]	0.0100692
HPA	testis; cells in seminiferous ducts[≥Medium]	0.0102186
HPA	appendix; germinal center cells[≥Low]	0.0115888
HPA	testis; round or early spermatids[≥Low]	0.0131821
HPA	hippocampus; glial cells[High]	0.0155565
HPA	kidney; cells in glomeruli[High]	0.0162099
HPA	appendix; enterocytes[High]	0.0168588
HPA	skin 2; sebaceous glands[≥Medium]	0.0183472
HPA	fallopian tube; non-ciliated cells[≥Low]	0.0199647
HPA	cerebellum; cells in molecular layer[High]	0.0237234
HPA	thymus; cortical cells[≥Medium]	0.0247726
HPA	appendix; germinal center cells[High]	0.0271375
HPA	colon; enterocytes[≥Medium]	0.0359479
HPA	heart muscle; cardiomyocytes[High]	0.0381384
HPA	skin 1; fibroblasts[≥Low]	0.0391867
HPA	skin 2; sebaceous glands[≥Low]	0.0433862
HPA	placenta; endothelial cells[≥Low]	0.046657
HPA	testis; peritubular cells[High]	0.0472292
HPA	cerebral cortex; glial cells[High]	0.0473481
HPA	fallopian tube; ciliated cells (cell body)[≥Low]	0.0488335
HPA	thymus; medullary cells[≥Low]	0.0495987
KEGG	Proteasome	7.53185e-18
KEGG	Cell cycle	5.28544e-15
KEGG	Nucleocytoplasmic transport	2.60124e-14
KEGG	Antigen processing and presentation	5.85266e-13
KEGG	DNA replication	2.55932e-11
KEGG	Spliceosome	1.30638e-10
KEGG	Amyotrophic lateral sclerosis	4.19695e-10
KEGG	Protein processing in endoplasmic reticulum	1.31233e-09
KEGG	Epstein-Barr virus infection	1.56702e-07
KEGG	Parkinson disease	3.86212e-07
KEGG	Prion disease	4.09765e-07
KEGG	Ribosome biogenesis in eukaryotes	5.06764e-07
KEGG	Alzheimer disease	2.11316e-06
KEGG	Carbon metabolism	9.8943e-06
KEGG	Huntington disease	1.04608e-05
KEGG	Human T-cell leukemia virus 1 infection	3.09938e-05
KEGG	Homologous recombination	3.15733e-05
KEGG	Graft-versus-host disease	4.21765e-05
KEGG	mRNA surveillance pathway	9.51071e-05
KEGG	Natural killer cell mediated cytotoxicity	0.000180168
KEGG	Mismatch repair	0.000515043
KEGG	Biosynthesis of amino acids	0.000516763
KEGG	Cellular senescence	0.00162568
KEGG	Pathways of neurodegeneration - multiple diseases	0.00245087
KEGG	RNA degradation	0.00256297
KEGG	Non-alcoholic fatty liver disease	0.00263959
KEGG	Viral myocarditis	0.00316322
KEGG	Biosynthesis of cofactors	0.00332131
KEGG	Influenza A	0.00357677
KEGG	Biosynthesis of nucleotide sugars	0.00462727
KEGG	Apoptosis	0.00607873
KEGG	Base excision repair	0.00718889
KEGG	Spinocerebellar ataxia	0.00814766
KEGG	RNA polymerase	0.0130304
KEGG	Amino sugar and nucleotide sugar metabolism	0.0135976
KEGG	Legionellosis	0.01489
KEGG	Nucleotide excision repair	0.022535
KEGG	Phagosome	0.0261272
KEGG	Terpenoid backbone biosynthesis	0.0480533
MIRNA	hsa-miR-193b-3p	7.37578e-39
MIRNA	hsa-let-7b-5p	2.11256e-27
MIRNA	hsa-miR-30a-5p	9.32246e-24
MIRNA	hsa-miR-615-3p	2.03755e-23
MIRNA	hsa-miR-16-5p	2.39671e-20
MIRNA	hsa-miR-92a-3p	4.59753e-20
MIRNA	hsa-miR-484	5.95017e-18
MIRNA	hsa-miR-98-5p	1.20679e-13
MIRNA	hsa-miR-34a-5p	2.70707e-12
MIRNA	hsa-miR-30c-5p	1.86386e-11
MIRNA	hsa-miR-186-5p	8.13395e-11
MIRNA	hsa-miR-320a	1.32568e-10
MIRNA	hsa-miR-155-5p	5.61995e-10
MIRNA	hsa-miR-1-3p	1.40459e-09
MIRNA	hsa-miR-149-5p	1.81694e-09
MIRNA	hsa-miR-24-3p	3.02694e-09
MIRNA	hsa-miR-215-5p	3.03553e-09
MIRNA	hsa-miR-30e-5p	5.14574e-08
MIRNA	hsa-miR-222-3p	8.59868e-08
MIRNA	hsa-let-7a-5p	1.07005e-07
MIRNA	hsa-miR-30b-5p	1.15037e-07
MIRNA	hsa-miR-192-5p	2.17974e-07
MIRNA	hsa-miR-877-3p	1.73052e-06
MIRNA	hsa-miR-30d-5p	1.95723e-06
MIRNA	hsa-let-7e-5p	4.02334e-06
MIRNA	hsa-miR-221-3p	9.04676e-06
MIRNA	hsa-miR-92b-3p	1.63884e-05
MIRNA	hsa-miR-125b-5p	1.78564e-05
MIRNA	hsa-miR-125a-5p	2.16614e-05
MIRNA	hsa-miR-26a-5p	3.30148e-05
MIRNA	hsa-miR-3148	6.12515e-05
MIRNA	hsa-miR-15b-5p	6.78601e-05
MIRNA	hsa-miR-183-5p	0.000114373
MIRNA	hsa-miR-324-5p	0.000148995
MIRNA	hsa-miR-455-3p	0.000219489
MIRNA	hsa-miR-26b-5p	0.000464114
MIRNA	hsa-miR-3662	0.00052895
MIRNA	hsa-miR-18a-3p	0.000818209
MIRNA	hsa-miR-3646	0.000822809
MIRNA	hsa-let-7c-5p	0.00111061
MIRNA	hsa-miR-196a-5p	0.00119753
MIRNA	hsa-miR-423-3p	0.00123182
MIRNA	hsa-miR-93-3p	0.00127673
MIRNA	hsa-miR-4668-5p	0.0017349
MIRNA	hsa-miR-23a-3p	0.00302115
MIRNA	hsa-miR-4699-5p	0.00315485
MIRNA	hsa-miR-4481	0.00330879
MIRNA	hsa-miR-4745-5p	0.00330879
MIRNA	hsa-miR-7-5p	0.00357536
MIRNA	hsa-miR-5688	0.00461204
MIRNA	hsa-miR-331-3p	0.0065628
MIRNA	hsa-miR-548i	0.00700506
MIRNA	hsa-miR-548d-5p	0.00700506
MIRNA	hsa-miR-361-5p	0.0071463
MIRNA	hsa-miR-340-5p	0.00920385
MIRNA	hsa-miR-375	0.0098769
MIRNA	hsa-miR-320b	0.0132075
MIRNA	hsa-miR-548aq-5p	0.0135997
MIRNA	hsa-miR-548ae-5p	0.0135997
MIRNA	hsa-miR-548ak	0.0135997
MIRNA	hsa-miR-548au-5p	0.0135997
MIRNA	hsa-miR-548ay-5p	0.0135997
MIRNA	hsa-miR-548ad-5p	0.0135997
MIRNA	hsa-miR-548b-5p	0.0135997
MIRNA	hsa-miR-548bb-5p	0.0135997
MIRNA	hsa-miR-548y	0.0135997
MIRNA	hsa-miR-548c-5p	0.0135997
MIRNA	hsa-miR-548h-5p	0.0135997
MIRNA	hsa-miR-548am-5p	0.0135997
MIRNA	hsa-miR-548as-5p	0.0135997
MIRNA	hsa-miR-548o-5p	0.0135997
MIRNA	hsa-miR-548w	0.0135997
MIRNA	hsa-miR-548ap-5p	0.0135997
MIRNA	hsa-miR-548ab	0.0135997
MIRNA	hsa-miR-548ar-5p	0.0135997
MIRNA	hsa-miR-3658	0.0136036
MIRNA	hsa-miR-193a-3p	0.0138918
MIRNA	hsa-let-7d-5p	0.0141711
MIRNA	hsa-miR-6888-5p	0.0143294
MIRNA	hsa-miR-4324	0.0157443
MIRNA	hsa-let-7f-5p	0.0160407
MIRNA	hsa-miR-548a-5p	0.0169406
MIRNA	hsa-miR-548j-5p	0.0169406
MIRNA	hsa-miR-30c-2-3p	0.0184335
MIRNA	hsa-miR-7161-5p	0.0192836
MIRNA	hsa-miR-744-5p	0.0203828
MIRNA	hsa-miR-1260b	0.020601
MIRNA	hsa-miR-559	0.0210101
MIRNA	hsa-miR-4316	0.0220883
MIRNA	hsa-miR-27b-3p	0.0235972
MIRNA	hsa-miR-4500	0.0274893
MIRNA	hsa-miR-4458	0.0274893
MIRNA	hsa-miR-30c-1-3p	0.0278453
MIRNA	hsa-let-7g-5p	0.0306866
MIRNA	hsa-miR-548n	0.0315877
MIRNA	hsa-miR-1245b-3p	0.0335302
MIRNA	hsa-miR-23b-3p	0.035539
MIRNA	hsa-miR-205-5p	0.0401638
MIRNA	hsa-miR-769-5p	0.0446224
MIRNA	hsa-let-7i-5p	0.0452152
MIRNA	hsa-miR-887-5p	0.0452523
MIRNA	hsa-miR-27a-3p	0.0457515
MIRNA	hsa-miR-32-5p	0.0464246
REAC	Cell Cycle	8.94029e-53
REAC	Metabolism of RNA	3.60852e-45
REAC	Cell Cycle, Mitotic	2.51423e-44
REAC	S Phase	5.66943e-34
REAC	Cell Cycle Checkpoints	8.96262e-34
REAC	Mitotic G1 phase and G1/S transition	2.27985e-32
REAC	Mitotic Metaphase and Anaphase	3.47166e-32
REAC	Mitotic Anaphase	8.54873e-32
REAC	DNA Replication	1.69871e-31
REAC	G1/S Transition	2.00279e-30
REAC	Synthesis of DNA	8.47001e-29
REAC	Separation of Sister Chromatids	2.12813e-26
REAC	Processing of Capped Intron-Containing Pre-mRNA	1.38013e-25
REAC	DNA Replication Pre-Initiation	5.3965e-25
REAC	HIV Infection	2.68674e-23
REAC	M Phase	2.12953e-22
REAC	mRNA Splicing - Major Pathway	1.64576e-20
REAC	Host Interactions of HIV factors	2.86741e-20
REAC	mRNA Splicing	3.85655e-20
REAC	G2/M Checkpoints	1.66326e-19
REAC	Mitochondrial translation	1.85341e-19
REAC	Assembly of the pre-replicative complex	5.19488e-19
REAC	Mitochondrial translation termination	1.18971e-18
REAC	Mitochondrial translation elongation	1.18971e-18
REAC	Regulation of ornithine decarboxylase (ODC)	7.33921e-18
REAC	Switching of origins to a post-replicative state	1.1251e-17
REAC	Metabolism of polyamines	1.36109e-17
REAC	Cyclin E associated events during G1/S transition	2.34411e-17
REAC	Cyclin A:Cdk2-associated events at S phase entry	2.56545e-17
REAC	Regulation of mitotic cell cycle	2.9227e-17
REAC	APC/C-mediated degradation of cell cycle proteins	2.9227e-17
REAC	Orc1 removal from chromatin	3.15467e-17
REAC	Activation of APC/C and APC/C:Cdc20 mediated degradation of mitotic proteins	5.23246e-17
REAC	Mitochondrial translation initiation	7.95063e-17
REAC	APC/C:Cdc20 mediated degradation of mitotic proteins	1.47709e-16
REAC	Regulation of APC/C activators between G1/S and early anaphase	5.34359e-16
REAC	APC:Cdc20 mediated degradation of cell cycle proteins prior to satisfation of the cell cycle checkpoint	1.16323e-15
REAC	Mitotic G2-G2/M phases	1.61246e-15
REAC	Cdc20:Phospho-APC/C mediated degradation of Cyclin A	3.24433e-15
REAC	SCF(Skp2)-mediated degradation of p27/p21	3.40589e-15
REAC	G2/M Transition	7.05128e-15
REAC	Cross-presentation of soluble exogenous antigens (endosomes)	7.80673e-15
REAC	APC/C:Cdh1 mediated degradation of Cdc20 and other APC/C:Cdh1 targeted proteins in late mitosis/early G1	9.71887e-15
REAC	CDT1 association with the CDC6:ORC:origin complex	1.0054e-14
REAC	p53-Independent DNA Damage Response	1.18805e-14
REAC	Ubiquitin-dependent degradation of Cyclin D	1.18805e-14
REAC	p53-Independent G1/S DNA damage checkpoint	1.18805e-14
REAC	Ubiquitin Mediated Degradation of Phosphorylated Cdc25A	1.18805e-14
REAC	Mitotic Prometaphase	1.59538e-14
REAC	CDK-mediated phosphorylation and removal of Cdc6	2.66284e-14
REAC	Cytokine Signaling in Immune system	3.07207e-14
REAC	Immune System	5.22191e-14
REAC	Mitotic Spindle Checkpoint	6.23333e-14
REAC	APC/C:Cdc20 mediated degradation of Securin	6.35163e-14
REAC	DNA strand elongation	7.94105e-14
REAC	Regulation of activated PAK-2p34 by proteasome mediated degradation	1.10469e-13
REAC	AUF1 (hnRNP D0) binds and destabilizes mRNA	2.00914e-13
REAC	Amplification of signal from unattached kinetochores via a MAD2 inhibitory signal	3.5539e-13
REAC	Amplification of signal from the kinetochores	3.5539e-13
REAC	Dectin-1 mediated noncanonical NF-kB signaling	3.56577e-13
REAC	ER-Phagosome pathway	3.8599e-13
REAC	Autodegradation of Cdh1 by Cdh1:APC/C	4.47658e-13
REAC	Resolution of Sister Chromatid Cohesion	5.04534e-13
REAC	Negative regulation of NOTCH4 signaling	5.91215e-13
REAC	Regulation of Apoptosis	5.91215e-13
REAC	SCF-beta-TrCP mediated degradation of Emi1	7.32625e-13
REAC	Antigen processing-Cross presentation	8.47719e-13
REAC	Degradation of DVL	8.74221e-13
REAC	NIK-->noncanonical NF-kB signaling	1.00954e-12
REAC	RHO GTPases Activate Formins	1.37979e-12
REAC	Regulation of RUNX3 expression and activity	2.11694e-12
REAC	TCR signaling	5.85282e-12
REAC	Vif-mediated degradation of APOBEC3G	6.08782e-12
REAC	Translation	6.17591e-12
REAC	FBXL7 down-regulates AURKA during mitotic entry and in early mitosis	7.07739e-12
REAC	Degradation of AXIN	7.07739e-12
REAC	Regulation of RUNX2 expression and activity	9.94992e-12
REAC	Regulation of HMOX1 expression and activity	1.00765e-11
REAC	Regulation of mRNA stability by proteins that bind AU-rich elements	1.45486e-11
REAC	Vpu mediated degradation of CD4	1.74205e-11
REAC	Autodegradation of the E3 ubiquitin ligase COP1	1.74205e-11
REAC	G1/S DNA Damage Checkpoints	2.65735e-11
REAC	Oxygen-dependent proline hydroxylation of Hypoxia-inducible Factor Alpha	2.69401e-11
REAC	The role of GTSE1 in G2/M progression after G2 checkpoint	4.78453e-11
REAC	tRNA processing in the nucleus	6.16904e-11
REAC	Stabilization of p53	6.60541e-11
REAC	ROS sensing by NFE2L2	6.60541e-11
REAC	Activation of NF-kappaB in B cells	6.92721e-11
REAC	Defective CFTR causes cystic fibrosis	7.09192e-11
REAC	DNA Repair	7.33941e-11
REAC	EML4 and NUDC in mitotic spindle formation	7.76913e-11
REAC	TNFR2 non-canonical NF-kB pathway	1.36054e-10
REAC	Downstream TCR signaling	1.59475e-10
REAC	Transcriptional Regulation by TP53	1.69518e-10
REAC	p53-Dependent G1 DNA Damage Response	1.79518e-10
REAC	p53-Dependent G1/S DNA damage checkpoint	1.79518e-10
REAC	Hh mutants are degraded by ERAD	1.80043e-10
REAC	SUMOylation of DNA replication proteins	2.37381e-10
REAC	HIV Life Cycle	2.73713e-10
REAC	Downstream signaling events of B Cell Receptor (BCR)	5.66672e-10
REAC	Asymmetric localization of PCP proteins	1.18351e-09
REAC	Degradation of GLI2 by the proteasome	1.29094e-09
REAC	GLI3 is processed to GLI3R by the proteasome	1.29094e-09
REAC	Postmitotic nuclear pore complex (NPC) reformation	1.6589e-09
REAC	Cellular response to hypoxia	1.73148e-09
REAC	Adaptive Immune System	2.81186e-09
REAC	Hh mutants abrogate ligand secretion	3.34447e-09
REAC	rRNA modification in the nucleus and cytosol	3.34447e-09
REAC	ABC transporter disorders	7.67586e-09
REAC	Activation of the pre-replicative complex	7.84687e-09
REAC	Degradation of GLI1 by the proteasome	8.13604e-09
REAC	Activation of ATR in response to replication stress	1.40407e-08
REAC	tRNA processing	1.49451e-08
REAC	Hedgehog ligand biogenesis	1.58702e-08
REAC	PCP/CE pathway	2.11842e-08
REAC	Late Phase of HIV Life Cycle	2.20456e-08
REAC	snRNP Assembly	2.4665e-08
REAC	Metabolism of non-coding RNA	2.4665e-08
REAC	G1/S-Specific Transcription	3.02307e-08
REAC	Interactions of Rev with host cellular proteins	3.25425e-08
REAC	NS1 Mediated Effects on Host Pathways	4.87846e-08
REAC	Metabolism of proteins	5.08075e-08
REAC	Regulation of PTEN stability and activity	6.46968e-08
REAC	Regulation of RAS by GAPs	7.38582e-08
REAC	SUMOylation of DNA damage response and repair proteins	1.13879e-07
REAC	Transport of Mature mRNAs Derived from Intronless Transcripts	1.54654e-07
REAC	Lagging Strand Synthesis	2.29658e-07
REAC	Interleukin-1 signaling	2.48777e-07
REAC	Cytoprotection by HMOX1	2.62517e-07
REAC	Rev-mediated nuclear export of HIV RNA	2.84497e-07
REAC	Resolution of AP sites via the multiple-nucleotide patch replacement pathway	3.07341e-07
REAC	Regulation of HSF1-mediated heat shock response	3.57712e-07
REAC	DNA Double-Strand Break Repair	3.67284e-07
REAC	CLEC7A (Dectin-1) signaling	3.75357e-07
REAC	Cellular response to chemical stress	4.22989e-07
REAC	Transport of Mature mRNA Derived from an Intronless Transcript	4.29065e-07
REAC	Viral Messenger RNA Synthesis	4.52626e-07
REAC	Disorders of transmembrane transporters	4.90929e-07
REAC	Apoptosis	5.62809e-07
REAC	Nuclear import of Rev protein	8.32634e-07
REAC	MAPK6/MAPK4 signaling	8.44423e-07
REAC	Transport of Mature Transcript to Cytoplasm	1.04001e-06
REAC	SUMOylation of RNA binding proteins	1.21483e-06
REAC	G0 and Early G1	1.46627e-06
REAC	Degradation of beta-catenin by the destruction complex	1.53175e-06
REAC	PCNA-Dependent Long Patch Base Excision Repair	1.77315e-06
REAC	Interferon Signaling	2.01513e-06
REAC	C-type lectin receptors (CLRs)	2.76956e-06
REAC	Transport of the SLBP Dependant Mature mRNA	2.79027e-06
REAC	SUMOylation of SUMOylation proteins	2.79027e-06
REAC	UCH proteinases	2.90889e-06
REAC	Programmed Cell Death	2.94473e-06
REAC	Homologous DNA Pairing and Strand Exchange	3.16239e-06
REAC	Cellular response to heat stress	3.76071e-06
REAC	Antiviral mechanism by IFN-stimulated genes	4.87723e-06
REAC	Signaling by Interleukins	5.06653e-06
REAC	Extension of Telomeres	5.19196e-06
REAC	Glycolysis	6.94806e-06
REAC	Signaling by NOTCH4	6.95821e-06
REAC	Transport of Ribonucleoproteins into the Host Nucleus	6.9711e-06
REAC	NEP/NS2 Interacts with the Cellular Export Machinery	6.9711e-06
REAC	Transcriptional regulation by RUNX2	7.42634e-06
REAC	Transport of the SLBP independent Mature mRNA	7.85719e-06
REAC	Vpr-mediated nuclear import of PICs	7.85719e-06
REAC	Nuclear Pore Complex (NPC) Disassembly	8.43907e-06
REAC	SUMOylation of ubiquitinylation proteins	8.72279e-06
REAC	RHO GTPase Effectors	9.60733e-06
REAC	Neutrophil degranulation	1.08396e-05
REAC	Glucose metabolism	1.62022e-05
REAC	Export of Viral Ribonucleoproteins from Nucleus	2.19286e-05
REAC	ABC-family proteins mediated transport	2.32355e-05
REAC	Interactions of Vpr with host cellular proteins	2.338e-05
REAC	Interleukin-1 family signaling	2.37622e-05
REAC	mRNA Splicing - Minor Pathway	2.59466e-05
REAC	HDR through Homologous Recombination (HRR)	2.79257e-05
REAC	Class I MHC mediated antigen processing & presentation	3.08265e-05
REAC	Presynaptic phase of homologous DNA pairing and strand exchange	5.27016e-05
REAC	Transcription of E2F targets under negative control by DREAM complex	5.98776e-05
REAC	Transport of Mature mRNA derived from an Intron-Containing Transcript	7.01787e-05
REAC	rRNA processing in the nucleus and cytosol	9.70949e-05
REAC	Nucleotide Excision Repair	9.99516e-05
REAC	Transcription of E2F targets under negative control by p107 (RBL1) and p130 (RBL2) in complex with HDAC1	0.000102416
REAC	Polo-like kinase mediated events	0.000102416
REAC	Processive synthesis on the lagging strand	0.000102416
REAC	Homology Directed Repair	0.000108976
REAC	Transcriptional regulation by RUNX3	0.000110782
REAC	Gene expression (Transcription)	0.000113039
REAC	SUMOylation	0.000114031
REAC	Unwinding of DNA	0.000118389
REAC	Resolution of Abasic Sites (AP sites)	0.000144121
REAC	Nuclear Envelope (NE) Reassembly	0.000146965
REAC	ISG15 antiviral mechanism	0.000146965
REAC	Telomere C-strand (Lagging Strand) Synthesis	0.00015483
REAC	Nuclear Envelope Breakdown	0.000164996
REAC	Interleukin-12 signaling	0.000164996
REAC	Hedgehog 'on' state	0.000173164
REAC	PTEN Regulation	0.00026905
REAC	rRNA processing	0.000324331
REAC	Removal of the Flap Intermediate	0.000342901
REAC	Polymerase switching	0.000342901
REAC	Leading Strand Synthesis	0.000342901
REAC	Transcription of the HIV genome	0.000404714
REAC	Defective TPR may confer susceptibility towards thyroid papillary carcinoma (TPC)	0.000442076
REAC	Regulation of Glucokinase by Glucokinase Regulatory Protein	0.000442076
REAC	Gap-filling DNA repair synthesis and ligation in TC-NER	0.000575243
REAC	Major pathway of rRNA processing in the nucleolus and cytosol	0.000626324
REAC	Gene and protein expression by JAK-STAT signaling after Interleukin-12 stimulation	0.000699654
REAC	Chromosome Maintenance	0.00088462
REAC	SUMO E3 ligases SUMOylate target proteins	0.00107466
REAC	Interleukin-12 family signaling	0.00107593
REAC	Chk1/Chk2(Cds1) mediated inactivation of Cyclin B:Cdk1 complex	0.00114226
REAC	Processing of Capped Intronless Pre-mRNA	0.00115599
REAC	HDR through Homologous Recombination (HRR) or Single Strand Annealing (SSA)	0.00126819
REAC	Mitochondrial protein import	0.00157821
REAC	RNA Polymerase II Transcription Termination	0.00157821
REAC	RNA Polymerase II Transcription Initiation And Promoter Clearance	0.00163134
REAC	RNA Polymerase II Transcription Initiation	0.00163134
[truncated: 984 more rows]

## Sheet: Low IR Terms (Fig.2)
source	term_name	p_value
CORUM	C complex spliceosome	0.0109354
GO:BP	cellular macromolecule metabolic process	2.62041e-15
GO:BP	cellular nitrogen compound biosynthetic process	1.33977e-11
GO:BP	macromolecule biosynthetic process	1.615e-11
GO:BP	organonitrogen compound metabolic process	3.30778e-11
GO:BP	organic substance biosynthetic process	3.50423e-11
GO:BP	cellular biosynthetic process	6.70131e-11
GO:BP	biosynthetic process	9.4975e-11
GO:BP	cellular protein metabolic process	1.06881e-10
GO:BP	cellular metabolic process	8.84639e-10
GO:BP	protein metabolic process	3.32064e-09
GO:BP	organonitrogen compound biosynthetic process	2.40005e-07
GO:BP	cellular macromolecule biosynthetic process	3.19673e-07
GO:BP	peptide biosynthetic process	8.3233e-07
GO:BP	regulation of nucleobase-containing compound metabolic process	8.88504e-07
GO:BP	translation	2.46949e-06
GO:BP	peptide metabolic process	3.18628e-06
GO:BP	heterocycle biosynthetic process	3.83163e-06
GO:BP	regulation of cellular metabolic process	4.51134e-06
GO:BP	aromatic compound biosynthetic process	4.67044e-06
GO:BP	nitrogen compound metabolic process	4.70736e-06
GO:BP	organic cyclic compound biosynthetic process	5.37924e-06
GO:BP	amide biosynthetic process	8.08434e-06
GO:BP	regulation of nitrogen compound metabolic process	9.2907e-06
GO:BP	nucleobase-containing compound biosynthetic process	1.25425e-05
GO:BP	regulation of RNA metabolic process	1.82046e-05
GO:BP	regulation of primary metabolic process	2.1518e-05
GO:BP	macromolecule modification	2.55053e-05
GO:BP	regulation of biosynthetic process	2.94155e-05
GO:BP	regulation of macromolecule biosynthetic process	4.69596e-05
GO:BP	cellular amide metabolic process	5.51354e-05
GO:BP	regulation of cellular biosynthetic process	6.16276e-05
GO:BP	primary metabolic process	0.000111384
GO:BP	ncRNA processing	0.000175285
GO:BP	organelle organization	0.00019845
GO:BP	metabolic process	0.000232128
GO:BP	ribosome biogenesis	0.000358252
GO:BP	ncRNA metabolic process	0.000462184
GO:BP	cellular process	0.000482844
GO:BP	cellular catabolic process	0.000501345
GO:BP	cellular response to stress	0.000633267
GO:BP	G1 to G0 transition	0.000775412
GO:BP	regulation of mRNA metabolic process	0.000952709
GO:BP	response to oxidative stress	0.00198441
GO:BP	cellular nitrogen compound metabolic process	0.00202725
GO:BP	negative regulation of cellular metabolic process	0.0022659
GO:BP	catabolic process	0.00330131
GO:BP	cellular macromolecule catabolic process	0.00333651
GO:BP	cell cycle process	0.00337539
GO:BP	aerobic respiration	0.00343319
GO:BP	protein modification process	0.00357094
GO:BP	cellular protein modification process	0.00357094
GO:BP	cell cycle	0.00359506
GO:BP	NADH dehydrogenase complex assembly	0.0040102
GO:BP	mitochondrial respiratory chain complex I assembly	0.0040102
GO:BP	cellular respiration	0.00441534
GO:BP	methylation	0.00493228
GO:BP	RNA localization	0.00535002
GO:BP	regulation of cell cycle process	0.00541052
GO:BP	regulation of cell cycle	0.00589739
GO:BP	positive regulation of macromolecule biosynthetic process	0.00692879
GO:BP	transcription, DNA-templated	0.00733418
GO:BP	nucleic acid-templated transcription	0.00744232
GO:BP	rRNA processing	0.00841431
GO:BP	mRNA transport	0.00929129
GO:BP	RNA biosynthetic process	0.00939144
GO:BP	mitochondrion organization	0.0103647
GO:BP	cellular response to oxidative stress	0.0114262
GO:BP	negative regulation of cellular biosynthetic process	0.0117619
GO:BP	negative regulation of macromolecule biosynthetic process	0.012897
GO:BP	respiratory electron transport chain	0.0130894
GO:BP	macromolecule catabolic process	0.0137009
GO:BP	positive regulation of cellular biosynthetic process	0.0148264
GO:BP	positive regulation of biosynthetic process	0.0150182
GO:BP	energy derivation by oxidation of organic compounds	0.0163381
GO:BP	histone modification	0.0179692
GO:BP	regulation of transcription, DNA-templated	0.0203258
GO:BP	regulation of nucleic acid-templated transcription	0.0206165
GO:BP	negative regulation of biosynthetic process	0.0215274
GO:BP	regulation of RNA biosynthetic process	0.0221296
GO:BP	negative regulation of nitrogen compound metabolic process	0.024149
GO:BP	process utilizing autophagic mechanism	0.0250533
GO:BP	autophagy	0.0250533
GO:BP	oxidative phosphorylation	0.0285308
GO:BP	nucleic acid transport	0.0300001
GO:BP	RNA transport	0.0300001
GO:BP	intrinsic apoptotic signaling pathway in response to oxidative stress	0.0310318
GO:BP	nucleobase-containing compound transport	0.0319756
GO:BP	cell death in response to oxidative stress	0.0327438
GO:BP	macromolecule methylation	0.0350937
GO:BP	establishment of RNA localization	0.0373954
GO:BP	positive regulation of nucleobase-containing compound metabolic process	0.0390346
GO:BP	mitotic cell cycle process	0.0498437
GO:CC	nucleoplasm	1.98584e-23
GO:CC	intracellular membrane-bounded organelle	4.10403e-22
GO:CC	cytoplasm	8.85165e-20
GO:CC	membrane-bounded organelle	1.08431e-19
GO:CC	intracellular organelle	2.53348e-17
GO:CC	intracellular organelle lumen	6.40132e-17
GO:CC	organelle lumen	6.54625e-17
GO:CC	membrane-enclosed lumen	6.54625e-17
GO:CC	intracellular anatomical structure	9.72566e-16
GO:CC	organelle	5.06155e-15
GO:CC	nuclear lumen	6.51771e-14
GO:CC	cytosol	4.34432e-11
GO:CC	envelope	1.51125e-10
GO:CC	organelle envelope	1.51125e-10
GO:CC	mitochondrion	2.65552e-09
GO:CC	organelle membrane	4.35688e-08
GO:CC	nucleus	1.66493e-07
GO:CC	catalytic complex	1.28153e-06
GO:CC	mitochondrial envelope	2.30646e-06
GO:CC	mitochondrial membrane	6.24416e-06
GO:CC	catalytic step 2 spliceosome	7.87582e-06
GO:CC	mitochondrial protein-containing complex	1.20233e-05
GO:CC	mitochondrial inner membrane	1.67263e-05
GO:CC	organelle inner membrane	9.61663e-05
GO:CC	spliceosomal complex	0.000163322
GO:CC	integral component of organelle membrane	0.000191936
GO:CC	mitochondrial matrix	0.0002141
GO:CC	intrinsic component of organelle membrane	0.00027182
GO:CC	nuclear body	0.00119267
GO:CC	oxidoreductase complex	0.00226894
GO:CC	intrinsic component of Golgi membrane	0.00232228
GO:CC	respiratory chain complex	0.00689961
GO:CC	mitochondrial respirasome	0.00689961
GO:CC	protein-containing complex	0.00811088
GO:CC	integral component of Golgi membrane	0.00849867
GO:CC	inner mitochondrial membrane protein complex	0.0112976
GO:CC	respirasome	0.0180355
GO:CC	nuclear envelope	0.0222786
GO:CC	ribosomal subunit	0.0288559
GO:CC	chromosomal region	0.0380196
GO:CC	bounding membrane of organelle	0.0443051
GO:MF	protein binding	1.56631e-26
GO:MF	binding	1.72383e-05
GO:MF	transferase activity	0.012096
GO:MF	transcription coregulator activity	0.0181772
GO:MF	catalytic activity	0.0182747
HPA	stomach 2; glandular cells[≥Medium]	1.15076e-27
HPA	urinary bladder; urothelial cells[≥Medium]	2.03084e-26
HPA	urinary bladder	4.99774e-26
HPA	urinary bladder; urothelial cells[≥Low]	4.99774e-26
HPA	seminal vesicle	3.46572e-24
HPA	seminal vesicle; glandular cells[≥Low]	3.46572e-24
HPA	rectum	1.73733e-23
HPA	gallbladder	2.96343e-23
HPA	gallbladder; glandular cells[≥Low]	2.96343e-23
HPA	esophagus	3.308e-23
HPA	esophagus; squamous epithelial cells[≥Low]	3.308e-23
HPA	endometrium 2; glandular cells[≥Low]	3.43093e-23
HPA	adrenal gland; glandular cells[≥Low]	6.10504e-23
HPA	endometrium 2	7.41206e-23
HPA	adrenal gland	7.94717e-23
HPA	stomach 2	8.96428e-23
HPA	stomach 2; glandular cells[≥Low]	8.96428e-23
HPA	rectum; glandular cells[≥Low]	1.20992e-22
HPA	duodenum; glandular cells[≥Low]	1.59101e-22
HPA	colon	1.72062e-22
HPA	endometrium 1	2.68574e-22
HPA	endometrium 1; glandular cells[≥Low]	3.30105e-22
HPA	duodenum	5.79005e-22
HPA	thyroid gland	1.2854e-21
HPA	thyroid gland; glandular cells[≥Low]	1.2854e-21
HPA	stomach 1; glandular cells[≥Medium]	1.33902e-21
HPA	colon; glandular cells[≥Low]	1.70529e-21
HPA	fallopian tube	1.83418e-21
HPA	adrenal gland; glandular cells[≥Medium]	1.94303e-21
HPA	placenta	2.91522e-21
HPA	skin 1; melanocytes[≥Low]	3.25461e-21
HPA	epididymis; glandular cells[≥Low]	4.00341e-21
HPA	epididymis	4.00341e-21
HPA	prostate	4.87047e-21
HPA	prostate; glandular cells[≥Low]	4.87047e-21
HPA	bronchus	7.35993e-21
HPA	stomach 1	9.59872e-21
HPA	stomach 1; glandular cells[≥Low]	9.59872e-21
HPA	oral mucosa; squamous epithelial cells[≥Low]	1.49945e-20
HPA	oral mucosa	1.49945e-20
HPA	appendix	1.51695e-20
HPA	colon; glandular cells[≥Medium]	2.02014e-20
HPA	pancreas; pancreatic endocrine cells[≥Low]	2.51734e-20
HPA	skin 2	2.60683e-20
HPA	small intestine; glandular cells[≥Low]	3.37427e-20
HPA	small intestine; glandular cells[≥Medium]	4.14068e-20
HPA	pancreas	4.97641e-20
HPA	rectum; glandular cells[≥Medium]	6.09432e-20
HPA	cervix	7.91947e-20
HPA	small intestine	8.65928e-20
HPA	gallbladder; glandular cells[≥Medium]	1.42934e-19
HPA	appendix; glandular cells[≥Low]	1.64394e-19
HPA	vagina	3.56492e-19
HPA	vagina; squamous epithelial cells[≥Low]	3.56492e-19
HPA	breast	4.24971e-19
HPA	duodenum; glandular cells[≥Medium]	4.79715e-19
HPA	lung	6.99914e-19
HPA	cerebellum; cells in molecular layer[≥Low]	2.87447e-18
HPA	skin 1	3.34953e-18
HPA	pancreas; exocrine glandular cells[≥Low]	4.10576e-18
HPA	thyroid gland; glandular cells[≥Medium]	4.70068e-18
HPA	appendix; glandular cells[≥Medium]	1.13385e-17
HPA	breast; glandular cells[≥Medium]	1.14186e-17
HPA	breast; glandular cells[≥Low]	1.44034e-17
HPA	tonsil; non-germinal center cells[≥Low]	1.45513e-17
HPA	skin 1; melanocytes[≥Medium]	1.67354e-17
HPA	tonsil; squamous epithelial cells[≥Low]	1.78055e-17
HPA	tonsil	3.9595e-17
HPA	heart muscle; cardiomyocytes[≥Low]	4.3442e-17
HPA	heart muscle	4.3442e-17
HPA	cervix; glandular cells[≥Medium]	4.42398e-17
HPA	endometrium 1; glandular cells[≥Medium]	4.45972e-17
HPA	kidney	9.69707e-17
HPA	ovary	1.02192e-16
HPA	lymph node; non-germinal center cells[≥Low]	1.33119e-16
HPA	lymph node	1.33715e-16
HPA	nasopharynx	1.47249e-16
HPA	bone marrow; hematopoietic cells[≥Low]	4.04317e-16
HPA	bone marrow	4.04317e-16
HPA	nasopharynx; respiratory epithelial cells[≥Medium]	4.50275e-16
HPA	cervix; glandular cells[≥Low]	9.80427e-16
HPA	esophagus; squamous epithelial cells[≥Medium]	1.8053e-15
HPA	fallopian tube; glandular cells[≥Medium]	2.40848e-15
HPA	testis	2.7922e-15
HPA	cervix; squamous epithelial cells[≥Low]	4.80443e-15
HPA	seminal vesicle; glandular cells[≥Medium]	5.03012e-15
HPA	salivary gland	5.82308e-15
HPA	salivary gland; glandular cells[≥Low]	5.82308e-15
HPA	colon; endothelial cells[≥Low]	7.80401e-15
HPA	spleen	8.32133e-15
HPA	placenta; trophoblastic cells[≥Medium]	8.57071e-15
HPA	kidney; cells in tubules[≥Low]	9.25995e-15
HPA	tonsil; germinal center cells[≥Low]	1.05427e-14
HPA	oral mucosa; squamous epithelial cells[≥Medium]	1.3378e-14
HPA	placenta; trophoblastic cells[≥Low]	1.46357e-14
HPA	liver	1.48713e-14
HPA	spleen; cells in white pulp[≥Low]	1.64423e-14
HPA	cerebellum	1.9008e-14
HPA	pancreas; exocrine glandular cells[≥Medium]	1.92676e-14
HPA	ovary; ovarian stroma cells[≥Low]	2.36021e-14
HPA	testis; Leydig cells[≥Low]	2.38442e-14
HPA	tonsil; non-germinal center cells[≥Medium]	2.5853e-14
HPA	liver; hepatocytes[≥Low]	2.74535e-14
HPA	salivary gland; glandular cells[≥Medium]	2.98059e-14
HPA	cerebral cortex	3.60525e-14
HPA	endometrium 2; glandular cells[≥Medium]	4.20835e-14
HPA	testis; Leydig cells[≥Medium]	1.0807e-13
HPA	prostate; glandular cells[≥Medium]	1.55574e-13
HPA	lung; macrophages[≥Low]	1.61196e-13
HPA	tonsil; squamous epithelial cells[≥Medium]	1.77463e-13
HPA	epididymis; glandular cells[≥Medium]	1.98553e-13
HPA	cerebellum; Purkinje cells[≥Low]	2.08518e-13
HPA	endometrium 2; cells in endometrial stroma[≥Low]	3.15109e-13
HPA	appendix; lymphoid tissue[≥Low]	3.19379e-13
HPA	cerebellum; cells in molecular layer[≥Medium]	3.37071e-13
HPA	endometrium 1; cells in endometrial stroma[≥Low]	3.77758e-13
HPA	pancreas; pancreatic endocrine cells[≥Medium]	5.17422e-13
HPA	cerebellum; cells in granular layer[≥Low]	5.20005e-13
HPA	fallopian tube; glandular cells[≥Low]	5.40384e-13
HPA	lymph node; germinal center cells[≥Low]	6.66418e-13
HPA	bronchus; respiratory epithelial cells[≥Medium]	1.15864e-12
HPA	heart muscle; cardiomyocytes[≥Medium]	1.22395e-12
HPA	spleen; cells in red pulp[≥Low]	2.41605e-12
HPA	breast; myoepithelial cells[≥Low]	2.80476e-12
HPA	bronchus; respiratory epithelial cells[≥Low]	2.87893e-12
HPA	adipose tissue	3.75031e-12
HPA	adipose tissue; adipocytes[≥Low]	3.75031e-12
HPA	caudate	4.34456e-12
HPA	skin 1; melanocytes[High]	5.7142e-12
HPA	cerebral cortex; neuronal cells[≥Medium]	6.50747e-12
HPA	adrenal gland; glandular cells[High]	7.08997e-12
HPA	smooth muscle; smooth muscle cells[≥Low]	9.58728e-12
HPA	smooth muscle	9.58728e-12
HPA	caudate; neuronal cells[≥Low]	1.12183e-11
HPA	parathyroid gland; glandular cells[≥Low]	1.17526e-11
HPA	parathyroid gland	1.17526e-11
HPA	skin 1; Langerhans[≥Medium]	1.21825e-11
HPA	rectum; glandular cells[High]	1.39852e-11
HPA	breast; myoepithelial cells[≥Medium]	1.4579e-11
HPA	skeletal muscle; myocytes[≥Low]	1.4679e-11
HPA	skeletal muscle	1.4679e-11
HPA	duodenum; glandular cells[High]	1.73671e-11
HPA	tonsil; germinal center cells[≥Medium]	2.01544e-11
HPA	vagina; squamous epithelial cells[≥Medium]	2.44894e-11
HPA	cerebellum; Purkinje cells[≥Medium]	2.49223e-11
HPA	cerebral cortex; neuronal cells[≥Low]	2.5743e-11
HPA	lymph node; non-germinal center cells[≥Medium]	3.50231e-11
HPA	skin 2; epidermal cells[≥Low]	4.76043e-11
HPA	nasopharynx; respiratory epithelial cells[≥Low]	7.87885e-11
HPA	parathyroid gland; glandular cells[≥Medium]	9.40579e-11
HPA	soft tissue 2	1.02856e-10
HPA	stomach 1; glandular cells[High]	1.28589e-10
HPA	hippocampus; neuronal cells[≥Low]	1.40193e-10
HPA	skin 1; Langerhans[≥Low]	1.60194e-10
HPA	caudate; neuronal cells[≥Medium]	1.6321e-10
HPA	hippocampus	2.5514e-10
HPA	lung; macrophages[≥Medium]	4.0015e-10
HPA	bronchus; respiratory epithelial cells[High]	5.07031e-10
HPA	colon; peripheral nerve/ganglion[≥Low]	5.14873e-10
HPA	kidney; cells in tubules[≥Medium]	6.05564e-10
HPA	bone marrow; hematopoietic cells[≥Medium]	8.07957e-10
HPA	colon; glandular cells[High]	8.6216e-10
HPA	soft tissue 2; fibroblasts[≥Low]	9.26349e-10
HPA	kidney; cells in glomeruli[≥Low]	1.27302e-09
HPA	liver; cholangiocytes[≥Low]	1.53619e-09
HPA	soft tissue 1	1.58557e-09
HPA	caudate; glial cells[≥Low]	1.86365e-09
HPA	testis; Leydig cells[High]	1.8995e-09
HPA	esophagus; squamous epithelial cells[High]	2.5302e-09
HPA	skin 1; keratinocytes[≥Low]	2.66443e-09
HPA	thyroid gland; glandular cells[High]	5.20518e-09
HPA	skin 2; epidermal cells[≥Medium]	5.38591e-09
HPA	urinary bladder; urothelial cells[High]	5.49904e-09
HPA	hippocampus; glial cells[≥Low]	5.66489e-09
HPA	cerebral cortex; endothelial cells[≥Low]	5.77814e-09
HPA	placenta; decidual cells[≥Low]	8.00217e-09
HPA	stomach 2; glandular cells[High]	1.31367e-08
HPA	skin 1; keratinocytes[≥Medium]	1.49187e-08
HPA	placenta; decidual cells[≥Medium]	1.58526e-08
HPA	cervix; squamous epithelial cells[≥Medium]	1.82097e-08
HPA	soft tissue 1; fibroblasts[≥Low]	1.93269e-08
HPA	small intestine; glandular cells[High]	2.65365e-08
HPA	soft tissue 2; fibroblasts[≥Medium]	2.90523e-08
HPA	endometrium 1; cells in endometrial stroma[≥Medium]	3.59689e-08
HPA	smooth muscle; smooth muscle cells[≥Medium]	4.16337e-08
HPA	appendix; lymphoid tissue[≥Medium]	4.44852e-08
HPA	gallbladder; glandular cells[High]	4.85133e-08
HPA	skin 1; fibroblasts[≥Low]	6.04984e-08
HPA	liver; hepatocytes[≥Medium]	7.02558e-08
HPA	cerebellum; cells in granular layer[≥Medium]	7.24449e-08
HPA	placenta; trophoblastic cells[High]	7.56208e-08
HPA	lymph node; germinal center cells[≥Medium]	7.82488e-08
HPA	appendix; glandular cells[High]	8.69981e-08
HPA	hippocampus; neuronal cells[≥Medium]	9.52731e-08
HPA	cerebral cortex; glial cells[≥Low]	9.85149e-08
HPA	soft tissue 2; peripheral nerve[≥Low]	1.20093e-07
HPA	adipose tissue; adipocytes[≥Medium]	3.48236e-07
HPA	breast; adipocytes[≥Low]	5.18813e-07
HPA	endometrium 2; cells in endometrial stroma[≥Medium]	6.32987e-07
HPA	pancreas; exocrine glandular cells[High]	7.13023e-07
HPA	epididymis; glandular cells[High]	1.21142e-06
HPA	breast; glandular cells[High]	1.38961e-06
HPA	soft tissue 1; fibroblasts[≥Medium]	1.39913e-06
HPA	heart muscle; cardiomyocytes[High]	1.88518e-06
HPA	bone marrow; hematopoietic cells[High]	2.81864e-06
HPA	vagina; squamous epithelial cells[High]	2.88923e-06
HPA	endometrium 2; glandular cells[High]	3.7436e-06
HPA	nasopharynx; respiratory epithelial cells[High]	4.13656e-06
HPA	ovary; ovarian stroma cells[≥Medium]	4.81561e-06
HPA	testis; spermatogonia cells[High]	5.9761e-06
HPA	tonsil; squamous epithelial cells[High]	6.23846e-06
HPA	ovary; follicle cells[≥Medium]	6.99901e-06
HPA	spleen; cells in red pulp[≥Medium]	7.76714e-06
HPA	seminal vesicle; glandular cells[High]	9.19867e-06
HPA	oral mucosa; squamous epithelial cells[High]	1.09869e-05
HPA	colon; endothelial cells[≥Medium]	1.31984e-05
HPA	colon; peripheral nerve/ganglion[≥Medium]	1.35134e-05
HPA	cervix; glandular cells[High]	1.4988e-05
HPA	soft tissue 1; peripheral nerve[≥Low]	1.57518e-05
HPA	fallopian tube; glandular cells[High]	1.58139e-05
HPA	cerebellum; Purkinje cells[High]	1.83216e-05
HPA	ovary; follicle cells[≥Low]	1.99776e-05
HPA	skin 2; epidermal cells[High]	2.01431e-05
HPA	testis; spermatogonia cells[≥Medium]	2.44538e-05
HPA	lung; alveolar cells type II[≥Low]	2.93324e-05
HPA	cervix; squamous epithelial cells[High]	3.00665e-05
HPA	skeletal muscle; myocytes[≥Medium]	3.73809e-05
HPA	hippocampus; glial cells[≥Medium]	3.93392e-05
HPA	kidney; cells in glomeruli[≥Medium]	6.6585e-05
HPA	skin 1; fibroblasts[≥Medium]	7.68119e-05
HPA	spleen; cells in white pulp[≥Medium]	8.30984e-05
HPA	breast; adipocytes[≥Medium]	8.85478e-05
HPA	skin 1; Langerhans[High]	0.000146468
HPA	cerebellum; cells in granular layer[High]	0.000153651
HPA	cerebral cortex; neuropil[≥Low]	0.000222027
HPA	salivary gland; glandular cells[High]	0.000246266
HPA	cerebral cortex; neuronal cells[High]	0.00025932
HPA	cerebral cortex; endothelial cells[≥Medium]	0.000343628
HPA	skin 1; keratinocytes[High]	0.000466591
HPA	lung; alveolar cells type II[≥Medium]	0.000503246
HPA	endometrium 1; glandular cells[High]	0.000575812
HPA	skin 1; fibroblasts[High]	0.000598387
HPA	testis; cells in seminiferous ducts[≥Medium]	0.00064548
HPA	placenta; decidual cells[High]	0.000667752
HPA	cerebellum; cells in molecular layer[High]	0.000810813
HPA	lung; alveolar cells[≥Low]	0.000856552
HPA	soft tissue 2; chondrocytes[≥Low]	0.000952593
HPA	pancreas; pancreatic endocrine cells[High]	0.00102129
HPA	skin 2; melanocytes[≥Low]	0.00145587
HPA	caudate; glial cells[≥Medium]	0.00147516
HPA	parathyroid gland; glandular cells[High]	0.00262889
HPA	spleen; cells in white pulp[High]	0.00269832
HPA	testis; spermatogonia cells[≥Low]	0.00277805
HPA	colon; peripheral nerve/ganglion[High]	0.00310269
HPA	testis; peritubular cells[≥Low]	0.00323818
HPA	breast; myoepithelial cells[High]	0.00352084
HPA	soft tissue 1; chondrocytes[≥Low]	0.00363757
HPA	soft tissue 2; peripheral nerve[≥Medium]	0.00373543
HPA	tonsil; germinal center cells[High]	0.00480896
HPA	lung; alveolar cells type II[High]	0.00653065
HPA	soft tissue 1; chondrocytes[≥Medium]	0.00707848
HPA	spleen; cells in red pulp[High]	0.00784924
HPA	breast; adipocytes[High]	0.00827843
HPA	lymph node; non-germinal center cells[High]	0.00862578
HPA	cerebral cortex; neuropil[≥Medium]	0.00931113
HPA	testis; preleptotene spermatocytes[≥Medium]	0.00975117
HPA	cerebral cortex; glial cells[≥Medium]	0.0102098
HPA	testis; cells in seminiferous ducts[≥Low]	0.0114777
HPA	liver; cholangiocytes[≥Medium]	0.0135155
HPA	lung; macrophages[High]	0.0154157
HPA	soft tissue 2; chondrocytes[≥Medium]	0.0179977
HPA	kidney; cells in tubules[High]	0.0203817
HPA	prostate; glandular cells[High]	0.0208555
HPA	lung; alveolar cells[≥Medium]	0.0221544
HPA	skin 2; endothelial cells[≥Medium]	0.0233197
HPA	soft tissue 1; fibroblasts[High]	0.0234639
HPA	skin 2; melanocytes[≥Medium]	0.0259536
HPA	tonsil; non-germinal center cells[High]	0.0277548
HPA	caudate; neuronal cells[High]	0.0294861
HPA	adipose tissue; adipocytes[High]	0.046474
KEGG	Amyotrophic lateral sclerosis	1.98072e-05
KEGG	Non-alcoholic fatty liver disease	0.000531792
KEGG	Spliceosome	0.00420971
KEGG	Parkinson disease	0.0204235
KEGG	Huntington disease	0.0492054
KEGG	Chemical carcinogenesis - reactive oxygen species	0.0499866
MIRNA	hsa-miR-615-3p	0.000595236
REAC	Metabolism of RNA	1.79975e-08
REAC	Processing of Capped Intron-Containing Pre-mRNA	4.14436e-06
REAC	mRNA Splicing - Major Pathway	0.00010747
REAC	mRNA Splicing	0.000226298
REAC	Cellular responses to stimuli	0.000398586
REAC	Cellular responses to stress	0.000547675
REAC	Respiratory electron transport	0.010724
REAC	The citric acid (TCA) cycle and respiratory electron transport	0.0236479
REAC	Respiratory electron transport, ATP synthesis by chemiosmotic coupling, and heat production by uncoupling proteins.	0.0243984
REAC	Complex I biogenesis	0.0337473
TF	Factor: ZF5; motif: GGSGCGCGS; match class: 1	4.24895e-25
TF	Factor: ZF5; motif: GSGCGCGR; match class: 1	7.77322e-25
TF	Factor: ZF5; motif: GGSGCGCGS	1.96321e-22
TF	Factor: E2F4; motif: YCCCGCCNCNNSSNNSNN; match class: 1	9.65096e-22
TF	Factor: ER81; motif: RCCGGAARYN; match class: 1	1.25442e-21
TF	Factor: ZF5; motif: GSGCGCGR	6.44093e-21
TF	Factor: GABP-alpha; motif: CTTCCK; match class: 1	2.16172e-20
TF	Factor: PEA3; motif: NACCGGAAGTN	6.51493e-20
TF	Factor: Elk-1; motif: NNCCGGAAGTN; match class: 1	6.92387e-20
TF	Factor: Erg; motif: NACCGGAARTN; match class: 1	4.4055e-19
TF	Factor: p300; motif: ACNTCCG; match class: 1	5.76581e-19
TF	Factor: E2F-4; motif: SNGGGCGGGAANN	2.05858e-18
TF	Factor: E2F-4; motif: SNGGGCGGGAANN; match class: 1	2.41804e-18
TF	Factor: ELF4; motif: NCCACTTCCGGNNNN; match class: 1	2.48775e-18
TF	Factor: E2F-2; motif: GCGCGCGCNCS; match class: 1	4.50063e-18
TF	Factor: SAP-1; motif: NNCCGGAAGTGN; match class: 1	9.66921e-18
TF	Factor: ELF1; motif: NNNASCCGGAAGTGGNNNN; match class: 1	1.35652e-17
TF	Factor: EHF; motif: CSCGGAARTN; match class: 1	1.81084e-17
TF	Factor: Fli-1; motif: NACCGGAARTN; match class: 1	3.23173e-17
TF	Factor: E2F-1:HES-7; motif: GGCRCGTGSYNNWNGGCGCSM; match class: 1	3.3493e-17
TF	Factor: E2F-1; motif: NGGGCGGGARV	7.5764e-17
TF	Factor: E2F1; motif: GSGCGGGAAN	1.27324e-16
TF	Factor: Elf-1; motif: NANCCGGAAGTN; match class: 1	1.40975e-16
TF	Factor: PEA3; motif: NACCGGAAGTN	1.48668e-16
TF	Factor: Elf-1; motif: NAMCCGGAAGTN; match class: 1	1.93751e-16
TF	Factor: nerf; motif: NNNCCGGAAGTGN; match class: 1	2.22006e-16
TF	Factor: E2F-4; motif: NTTTCSCGCC	2.28591e-16
TF	Factor: ETS1; motif: ACCGGAARYN; match class: 1	3.28913e-16
TF	Factor: TEL1; motif: CNCGGAANNN	3.57922e-16
TF	Factor: FLI-1; motif: NAYTTCCGGT	5.25672e-16
TF	Factor: E2F-3:HES-7; motif: NNNSGCGCSNNNNNCRCGYGNN; match class: 1	6.62651e-16
TF	Factor: FLI-1; motif: NAYTTCCGGT; match class: 1	1.02527e-15
TF	Factor: Erg; motif: ACCGGAAGTN	1.6779e-15
TF	Factor: Elk-1; motif: NNNNCCGGAARTNN; match class: 1	2.04534e-15
TF	Factor: c-ets-2; motif: ACCGGAWRTN	2.92879e-15
TF	Factor: c-ets-1; motif: ACCGGAWGTN	3.56823e-15
TF	Factor: E2F4; motif: YCCCGCCNCNNSSNNSNN	3.62432e-15
TF	Factor: E2F-2; motif: GCGCGCGCNCS	3.9882e-15
TF	Factor: SAP-1; motif: NNCCGGAAGTGN	4.43007e-15
TF	Factor: GABPA; motif: ACCGGAAGTN	5.55888e-15
TF	Factor: ELF4; motif: NCCACTTCCGGNNNN	5.74622e-15
TF	Factor: E2F; motif: GGCGSG	6.0688e-15
TF	Factor: c-Ets-2; motif: NCCGGAAGTG	6.69861e-15
TF	Factor: PEA3; motif: RCCGGAAGYN	8.04282e-15
TF	Factor: Erm; motif: ACCGGAAGTN	8.12384e-15
TF	Factor: Erm; motif: NNSCGGAWGYN	8.44189e-15
TF	Factor: Elf-1; motif: ACTTCCGGG	1.05218e-14
TF	Factor: ELK-1; motif: ACCGGAAGTN	1.23055e-14
TF	Factor: Erm; motif: NNSCGGAWGYN; match class: 1	1.48559e-14
TF	Factor: Elf-1; motif: ACTTCCGGG; match class: 1	1.57162e-14
TF	Factor: FLI1; motif: ACCGGAARTN	1.72397e-14
TF	Factor: E2F-1:Elk-1; motif: SGCGCSNNAMCGGAAGT	2.10825e-14
TF	Factor: ETV4; motif: ACCGGAAGTN	2.20151e-14
TF	Factor: Elf-1; motif: NAMCCGGAAGTN	2.23658e-14
TF	Factor: E2F-3:TBR2; motif: ANGTGYKANGGCGCSTTNNCRNNT; match class: 1	3.15041e-14
TF	Factor: c-Ets-1; motif: NNNRCCGGAWRYNNNN	3.5105e-14
TF	Factor: PEA3; motif: NACCGGAAGTN; match class: 1	3.51121e-14
TF	Factor: Elk-1; motif: NNCCGGAAGTN	3.51334e-14
TF	Factor: ERG; motif: ACCGGAART	3.65918e-14
TF	Factor: ETV7; motif: NCCGGAANNN	3.85559e-14
TF	Factor: c-Ets-2; motif: NCCGGAAGTG; match class: 1	4.2847e-14
TF	Factor: ER81; motif: RCCGGAARYN	4.29678e-14
TF	Factor: Elk-1; motif: NNNNCCGGAARTNN	4.58826e-14
TF	Factor: ELF1; motif: NNNASCCGGAAGTGGNNNN	5.48683e-14
TF	Factor: ERG; motif: ACCGGAARTN	7.65403e-14
TF	Factor: E2F-1; motif: NNNNGGCGGGAARN	8.16252e-14
TF	Factor: Elf-1; motif: NANGCGGAAGTN; match class: 1	8.80903e-14
TF	Factor: Fli-1; motif: NACCGGAARTN	9.31131e-14
TF	Factor: Elf-1; motif: NAANCMGGAAGTGN; match class: 1	9.83827e-14
TF	Factor: ERG; motif: ACCGGAART; match class: 1	1.0244e-13
TF	Factor: E2F-2; motif: GCGCGCGCGYW	1.09986e-13
TF	Factor: PEA3; motif: NACCGGAAGTN	1.13258e-13
TF	Factor: Erg; motif: NACCGGAARYN	1.13651e-13
TF	Factor: FLI1; motif: ACCGGAARTN; match class: 1	1.35765e-13
TF	Factor: Elk-1; motif: NRSCGGAAGNN	1.41673e-13
TF	Factor: Elk-1; motif: NRSCGGAAGNN; match class: 1	1.541e-13
TF	Factor: Fli-1; motif: ACCGGAAGYN	1.5806e-13
TF	Factor: nerf; motif: NNNCCGGAAGTGN	1.72009e-13
TF	Factor: E2F-2; motif: NWTTTGGCGCCAWWNN	1.91448e-13
TF	Factor: ELK-1; motif: ACCGGAAGTN; match class: 1	2.48589e-13
TF	Factor: ER81; motif: NNCCGGAWGYN	2.62739e-13
TF	Factor: c-ets-2; motif: ACCGGAWRTN; match class: 1	2.68061e-13
TF	Factor: Elf-1; motif: NAANCMGGAAGTGN	2.71495e-13
TF	Factor: PEA3; motif: NACCGGAAGTN	2.91231e-13
TF	Factor: Elk-1; motif: RCCGGAAGTGN; match class: 1	2.96581e-13
TF	Factor: ETS1; motif: ACCGGAARYN	3.28554e-13
TF	Factor: PEA3; motif: NACCGGAAGTN; match class: 1	3.28664e-13
TF	Factor: ETV7; motif: NCCGGAANNN; match class: 1	4.31488e-13
TF	Factor: Erg; motif: NACCGGAARTN	4.59044e-13
TF	Factor: Fli-1; motif: NACCGGAARTN; match class: 1	4.8676e-13
TF	Factor: ER71; motif: ACCGGAARYN	5.62697e-13
TF	Factor: ELF1; motif: NCCGGAARTN; match class: 1	7.70821e-13
TF	Factor: Erg; motif: NACCGGAARYN; match class: 1	7.95513e-13
TF	Factor: Elf-1; motif: AWCCCGGAAGTN	9.93142e-13
TF	Factor: Elk-1; motif: RCCGGAAGTGN	1.03713e-12
TF	Factor: GABP-alpha; motif: NNNRCCGGAAGTGN	1.14696e-12
TF	Factor: PEA3; motif: NACCGGAAGTN; match class: 1	1.24649e-12
TF	Factor: PEA3; motif: NACCGGAAGTN; match class: 1	1.54105e-12
TF	Factor: E2F-1:Elk-1; motif: SGCGCSNNAMCGGAAGT; match class: 1	1.57571e-12
TF	Factor: Fli-1; motif: NACCGGAARTN	1.76005e-12
TF	Factor: nerf; motif: NRRNSCGGAAGNRNNNN	1.76137e-12
TF	Factor: TCF-1; motif: ACATCGRGRCGCTGW	1.86375e-12
TF	Factor: GKLF; motif: NNCCMCRCCCN	2.06693e-12
TF	Factor: E2F-2; motif: NWTTTGGCGCCAWWNN; match class: 1	2.17516e-12
TF	Factor: EHF; motif: CSCGGAARTN	2.32461e-12
TF	Factor: Elf-1; motif: NANCCGGAAGTN	3.37466e-12
TF	Factor: ELF2; motif: CCCGGAARYN	4.69792e-12
TF	Factor: ERG; motif: ACCGGAARTN; match class: 1	4.81048e-12
TF	Factor: c-Ets-1; motif: NNNRCCGGAWRYNNNN; match class: 1	5.09064e-12
TF	Factor: Erm; motif: ACCGGAAGTN; match class: 1	5.26372e-12
TF	Factor: ELF1; motif: NCCGGAARTN	5.68667e-12
TF	Factor: ERM; motif: NNCACTTCCGGNN	5.91856e-12
TF	Factor: E2F-1; motif: WWTGGCGCCAAA	8.23641e-12
TF	Factor: PEA3; motif: RCCGGAAGYN; match class: 1	9.63888e-12
TF	Factor: nerf; motif: NRRNSCGGAAGNRNNNN; match class: 1	1.02362e-11
TF	Factor: E2F-4; motif: NNTTCCCGCCNN	1.52541e-11
TF	Factor: ELF4; motif: NCCGGAARTN	1.70084e-11
TF	Factor: E2F-7; motif: GRGGCGGGAANNN	1.97907e-11
TF	Factor: GABP-alpha; motif: CTTCCK	2.32787e-11
TF	Factor: E2F-1:HES-7; motif: GGCRCGTGSYNNWNGGCGCSM	2.84916e-11
TF	Factor: Elf-1; motif: NNANCCGGAAGTGS	2.8829e-11
TF	Factor: ESE-1; motif: NSMGGAARTN; match class: 1	5.67405e-11
TF	Factor: ESE-1; motif: NSMGGAARTN; match class: 1	5.67405e-11
TF	Factor: Erg; motif: ACCGGAAGTN; match class: 1	6.19243e-11
TF	Factor: c-ets-1; motif: ACCGGAWGTN; match class: 1	6.9627e-11
TF	Factor: IRX-1; motif: NACRYNNNNNNNNRYGNN; match class: 1	7.88924e-11
TF	Factor: Elk-1; motif: NRCCGGAAGTN	8.4872e-11
TF	Factor: meis1:Elf-1; motif: NTGCCGGAAGTN; match class: 1	9.39977e-11
TF	Factor: E2F-3:TBR2; motif: ANGTGYKANGGCGCSTTNNCRNNT	9.64862e-11
TF	Factor: TEL1; motif: CNCGGAANNN; match class: 1	1.02128e-10
TF	Factor: Elf-1; motif: AWCCCGGAAGTN; match class: 1	1.6551e-10
TF	Factor: Elf-1; motif: NANGCGGAAGTR; match class: 1	2.12304e-10
TF	Factor: ETV3; motif: ACCGGAAGTN	2.23094e-10
TF	Factor: Elf-1; motif: NNANCCGGAAGTGS; match class: 1	2.40532e-10
TF	Factor: ELK1; motif: ACCGGAAGTN	2.54014e-10
TF	Factor: GABP-alpha; motif: CACTTCCGG	2.90794e-10
TF	Factor: ERM; motif: NNCACTTCCGGNN; match class: 1	3.93503e-10
TF	Factor: meis1:Elf-1; motif: NTGCCGGAAGTN	4.83037e-10
TF	Factor: sp4; motif: NNGNARGRGGCGGRGCNNRR	5.0355e-10
TF	Factor: Fli-1; motif: ACCGGAAGYN; match class: 1	5.39991e-10
TF	Factor: p300; motif: ACNTCCG	6.29506e-10
TF	Factor: Elf-1; motif: NANSCGGAAGTR	6.69135e-10
TF	Factor: ZF5; motif: NRNGNGCGCGCWN	6.76616e-10
TF	Factor: E2F-3:HES-7; motif: NNNSGCGCSNNNNNCRCGYGNN	7.52848e-10
TF	Factor: Elf-1; motif: NANGCGGAAGTN	8.51645e-10
TF	Factor: ELF3; motif: WACCCGGAAGTAN	1.06239e-09
TF	Factor: ETV4; motif: ACCGGAAGTN; match class: 1	1.12081e-09
TF	Factor: Elk-1:HOXA1; motif: ACCGGAAGTAATTA; match class: 1	1.49754e-09
TF	Factor: BTEB4; motif: NCCACGCCCM	1.64181e-09
TF	Factor: ER71; motif: NACCGGAARTN	1.76163e-09
TF	Factor: GABP; motif: CACTTCCGGNNN	1.98269e-09
TF	Factor: SP2; motif: GGGCGGGAC	2.00515e-09
TF	Factor: ELF1; motif: AACCCGGAAGTR	2.2151e-09
TF	Factor: E2F-1; motif: NGGGCGGGARV; match class: 1	2.25157e-09
TF	Factor: GABP-ALPHA; motif: RCCGGAARTNN	2.3967e-09
TF	Factor: BEN; motif: CAGCGRNV	2.71527e-09
TF	Factor: GABP-alpha; motif: NNNRCCGGAAGTGN; match class: 1	2.8362e-09
TF	Factor: SP1; motif: GGCCCCGCCCCCN	2.86943e-09
TF	Factor: ERF; motif: ACCGGAARYN	3.26361e-09
TF	Factor: ELK1; motif: NACTTCCGSCGGAAGYN	3.31075e-09
TF	Factor: ESE-1; motif: NWTRCGGAWGCN; match class: 1	3.3463e-09
TF	Factor: ETV5; motif: NNACTTCCGNN	3.65618e-09
TF	Factor: E2F-4; motif: TTTTGGCGCCAWWN	4.21775e-09
TF	Factor: Net; motif: NACCGGAAGTN	4.50396e-09
TF	Factor: Sp1; motif: NGGGGGCGGGGYN	4.72715e-09
TF	Factor: Elf-1; motif: NANGCGGAAGTR	6.47501e-09
TF	Factor: etv3; motif: ACCGGAAGYN	6.65755e-09
TF	Factor: E2F-1; motif: WWTGGCGCCAAA; match class: 1	6.86237e-09
TF	Factor: Pet-1; motif: ACCGGAWRTN	6.88767e-09
TF	Factor: ETV5; motif: NCCGGAWGYN	7.13795e-09
TF	Factor: TCF-1; motif: ACATCGRGRCGCTGW; match class: 1	8.51695e-09
TF	Factor: GCMa:PEA3; motif: ATRCGGGCGGAAGTR; match class: 1	8.55584e-09
TF	Factor: ER71; motif: ACCGGAARYN; match class: 1	9.2579e-09
TF	Factor: E2F-2; motif: GCGCGCGCGYW; match class: 1	1.04252e-08
TF	Factor: E2F-1; motif: TTTGGCGCCAAA; match class: 1	1.1122e-08
TF	Factor: Net; motif: NRCCGGAAGTN	1.14185e-08
TF	Factor: GABP-alpha; motif: NACCGGAAGTN	1.14631e-08
TF	Factor: ER81; motif: NACCGGAAGTN	1.26646e-08
TF	Factor: ELF3; motif: WACCCGGAAGTAN; match class: 1	1.29064e-08
TF	Factor: E2F1; motif: GSGCGGGAAN; match class: 1	1.31187e-08
TF	Factor: TCF-1; motif: ACATCGRGRCGCTGW	1.32278e-08
TF	Factor: c-Ets-1(p54); motif: NCMGGAWGYN; match class: 1	1.35454e-08
TF	Factor: GABP-alpha; motif: NRCCGGAAGTN	1.58879e-08
TF	Factor: Erg; motif: NNACCGGAARTSN	1.70142e-08
TF	Factor: ELF1; motif: AACCCGGAAGTR; match class: 1	1.74416e-08
TF	Factor: ER81; motif: NNCCGGAWGYN; match class: 1	1.8726e-08
TF	Factor: Elf-1; motif: NANSCGGAAGTR; match class: 1	2.05564e-08
TF	Factor: sp4; motif: NNNGCYCCGCCCCCY	2.13735e-08
TF	Factor: SAP-1; motif: NRCCGGAWGYN	2.44394e-08
TF	Factor: ESE-1; motif: NSMGGAARTN	3.16125e-08
TF	Factor: ESE-1; motif: NSMGGAARTN	3.16125e-08
TF	Factor: E2F-3; motif: GGCGGGN	3.25388e-08
TF	Factor: Elf-1; motif: NANCCGGAAGTN	3.34038e-08
TF	Factor: GABPalpha; motif: RCCGGAWRYN	4.02983e-08
TF	Factor: GKLF; motif: GCCMCRCCCNNN	4.51707e-08
TF	Factor: ER81; motif: NNCCGGAAGYG	4.86462e-08
TF	Factor: GABPA; motif: ACCGGAAGTN; match class: 1	4.9953e-08
TF	Factor: ETS1; motif: GCCGGAWGTACTTCCGGN	9.42127e-08
TF	Factor: YY2; motif: NCCGCCATNTY	1.13242e-07
TF	Factor: ZF5; motif: NRNGNGCGCGCWN; match class: 1	1.20614e-07
TF	Factor: SAP-1; motif: ACCGGAAGTNN	1.59079e-07
TF	Factor: ETF; motif: GVGGMGG	1.61539e-07
TF	Factor: YY1; motif: NNCGCCATTNN	1.99923e-07
TF	Factor: IRX-1; motif: NACRYNNNNNNNNRYGNN	2.06559e-07
TF	Factor: ER71:E2A; motif: CASSTGNACCGGAWRYN; match class: 1	2.78673e-07
TF	Factor: E2F-1; motif: NNNNGGCGGGAARN; match class: 1	2.98764e-07
TF	Factor: ELK4; motif: NCRCTTCCGGN	3.04609e-07
TF	Factor: GABPalpha; motif: RCCGGAWRYN; match class: 1	3.19657e-07
TF	Factor: Elk-1:Pax-5; motif: ACCGGAACYACGCWTSANYG; match class: 1	3.22632e-07
TF	Factor: TEF-3:ER81; motif: ACCGGAAATRCC	3.4961e-07
TF	Factor: GKLF; motif: NNCCMCRCCCN; match class: 1	3.90874e-07
TF	Factor: ESE-1; motif: NWTRCGGAWGCN	4.10245e-07
TF	Factor: Egr-1; motif: GCGCATGCG	4.16795e-07
TF	Factor: ELF4; motif: NCCGGAARTN; match class: 1	4.66881e-07
TF	Factor: E2F-1; motif: TTTGGCGCCAAA	5.57327e-07
TF	Factor: Elk-1:Pax-5; motif: ACCGGAACYACGCWTSANYG	6.46088e-07
TF	Factor: E2F-1:TBR2; motif: NGGTGNNANGGCGCNNTNNCRNNN; match class: 1	6.6002e-07
TF	Factor: E2F-4; motif: NNTTCCCGCCNN; match class: 1	7.89121e-07
TF	Factor: YY1; motif: NNCGCCATTNN; match class: 1	7.94822e-07
TF	Factor: MAZ; motif: GGGMGGGGSSGGGGGGGGGGGG; match class: 1	7.95756e-07
TF	Factor: ATF-3; motif: GGCGCSSNSNGRTSACGTSA	9.16791e-07
TF	Factor: AP-2gamma:Elk-1; motif: NGCCKNRGGSGRCGGAAGTG; match class: 1	9.30519e-07
TF	Factor: Kaiso; motif: TCTCGCGAG; match class: 1	1.04892e-06
TF	Factor: E2F-1:DP-1; motif: TTTCSCGC	1.05198e-06
TF	Factor: Erg; motif: NNACCGGAARTSN; match class: 1	1.09148e-06
TF	Factor: YY1; motif: GCCGCCATTTTG	1.34707e-06
TF	Factor: E2F-3:FOXI1; motif: NGACACCGCGCCCAC	1.37143e-06
TF	Factor: Elk-1; motif: RACCGGAAGTR	1.44656e-06
TF	Factor: ELK1; motif: ACCGGAAGTN; match class: 1	1.48717e-06
TF	Factor: Elk-1; motif: AACCGGAAGTR	1.52641e-06
TF	Factor: E2F-4:DP-1; motif: TTTSGCGC	1.61424e-06
TF	Factor: ELK3; motif: ACCGGAAGTN	1.80569e-06
TF	Factor: E2F-4; motif: NTTTCSCGCC; match class: 1	1.81502e-06
TF	Factor: BEN; motif: CAGCGRNV; match class: 1	1.93486e-06
TF	Factor: GABP; motif: VCCGGAAGNGCR	2.06926e-06
TF	Factor: FEV; motif: ACCGGAAGTN	2.42609e-06
TF	Factor: ER81; motif: NNNGRCMGGAAGYRNNNNNNNS	2.99174e-06
TF	Factor: E2F; motif: GGCGSG; match class: 1	3.06866e-06
TF	Factor: E2F-4; motif: GCGGGAAANA	3.07296e-06
TF	Factor: TCF-1; motif: ACATCGRGRCGCTGW; match class: 1	3.19429e-06
TF	Factor: ER81; motif: NACCGGAAGTN	3.29873e-06
TF	Factor: Elk-1:TBR2; motif: TNRCACCGGAAGN	3.33284e-06
TF	Factor: ER71:SREBP-2; motif: NTSACGTGACGGAARY; match class: 1	3.7027e-06
TF	Factor: E2F-1:TBR2; motif: NGGTGNNANGGCGCNNTNNCRNNN	3.96583e-06
TF	Factor: YY1; motif: CAANATGGCGGC; match class: 1	4.2378e-06
TF	Factor: EHF; motif: NACCCGGAAGTA	4.30568e-06
TF	Factor: ETV5; motif: NNACTTCCGNN; match class: 1	4.53919e-06
TF	Factor: SP1; motif: RCCMCRCCCMC	4.62113e-06
TF	Factor: Sp1; motif: NNGGGGCGGGGNN	5.53471e-06
TF	Factor: DP-1; motif: NRNNGGCGGGAANN	5.54114e-06
TF	Factor: ER71:SREBP-2; motif: NTSACGTGACGGAARY	6.4331e-06
TF	Factor: Sp1; motif: NWRGCCACGCCCMCN	6.61419e-06
TF	Factor: SAP-1; motif: ACCGGAAGTNN; match class: 1	8.09273e-06
TF	Factor: PAX5; motif: RNGCGTGACCNN	8.10658e-06
TF	Factor: Elk-1; motif: NACMGGAAGTN	8.39282e-06
TF	Factor: SP2; motif: GGGCGGGAC; match class: 1	8.42479e-06
TF	Factor: GCMa:PEA3; motif: ATRCGGGCGGAAGTR	9.01051e-06
TF	Factor: ETV7; motif: NNSCGGAAGTR	9.42798e-06
TF	Factor: Sp1; motif: GGGGCGGGGC	9.56464e-06
TF	Factor: E2F; motif: TTTCGCGC; match class: 1	1.01314e-05
TF	Factor: pax-6; motif: NYACGCNYSANYGMNCN	1.03482e-05
TF	Factor: E2F-4; motif: NGGCGGGAARN	1.05589e-05
TF	Factor: Sp1; motif: NGGGGCGGGGN	1.11109e-05
TF	Factor: Elk-1; motif: RACCGGAAGTR; match class: 1	1.15153e-05
TF	Factor: E2F-1; motif: NKTSSCGC	1.2476e-05
TF	Factor: E2F-3; motif: GGCGGGN; match class: 1	1.24945e-05
TF	Factor: Rb:E2F-1:DP-1; motif: TTTSGCGC	1.33614e-05
TF	Factor: Elk-1; motif: NRCCGGAAGTN; match class: 1	1.33862e-05
TF	Factor: SP1; motif: NRGKGGGCGGGGCN	1.43958e-05
TF	Factor: Fli-1; motif: NACCGGAARTN	1.47779e-05
TF	Factor: Erm; motif: NRCMGGAAGTN	1.85938e-05
TF	Factor: ER71:Pax-5; motif: ACCGGAACYACGCWTSANTG	2.01124e-05
TF	Factor: ETF; motif: CCCCGCCCCYN	2.01928e-05
TF	Factor: E2F-1; motif: NTTTTGGCGCCAWWWN	2.49523e-05
TF	Factor: TIEG1; motif: NCCCNSNCCCCGCCCCC	2.67684e-05
TF	Factor: MAZ; motif: GGGMGGGGSSGGGGGGGGGGGG	2.67724e-05
TF	Factor: Kaiso; motif: GNTCTCGCGAGRNNNNGGN; match class: 1	2.69542e-05
TF	Factor: E2F-4; motif: NGGCGGGAARN; match class: 1	2.77306e-05
TF	Factor: E2F-1; motif: NTTTCGCGCS	2.78833e-05
TF	Factor: Elk-1:T-bet; motif: TCACACCGGAAGNN	2.96126e-05
TF	Factor: SAP-1a; motif: NACCGGAAGTV	3.08155e-05
TF	Factor: sp4; motif: NNGNARGRGGCGGRGCNNRR; match class: 1	3.13042e-05
TF	Factor: Tel-2; motif: YTACTTCCTG	3.86578e-05
TF	Factor: KLF3; motif: NNNNNNGGGCGGGGCNNGN	3.98699e-05
TF	Factor: Sp1; motif: NGGGGGCGGGGCCNGGGGGGGG	4.18949e-05
TF	Factor: Elk-1:Pax-9; motif: ACCGGAACYACGCWYSANTG; match class: 1	4.34767e-05
TF	Factor: Elk-1:Pax-9; motif: ACCGGAACYACGCWYSANTG	4.38443e-05
TF	Factor: ER71:Pax-5; motif: ACCGGAACYACGCWTSANTG; match class: 1	5.196e-05
TF	Factor: ETF; motif: CCCCGCCCCYN; match class: 1	6.18339e-05
TF	Factor: Elf-1; motif: NANCCGGAAGTN; match class: 1	6.28249e-05
TF	Factor: Egr-1; motif: GCGCATGCG; match class: 1	7.24342e-05
TF	Factor: EKLF; motif: NGGGYGKGGCNNGG	7.36868e-05
TF	Factor: CREB1; motif: NNNNSSGGCGCSSNNNNRTGACGTCAC; match class: 1	8.48503e-05
TF	Factor: SP4; motif: NWRGCCACGCCCMCTYN	8.51249e-05
TF	Factor: Sp2; motif: NTAAGYCCCGCCCMCTN	9.37788e-05
TF	Factor: HES-7; motif: GNCACGYGNN	9.44662e-05
TF	Factor: CHD2; motif: TCTCGCGAG	0.000106293
TF	Factor: REX-1; motif: GGCMGCCATTTT	0.000109338
TF	Factor: Sp2; motif: NYSGCCCCGCCCCCY	0.000111659
TF	Factor: E2F-1; motif: NNNSSCGCSAANN	0.000118612
TF	Factor: Churchill; motif: CGGGNN	0.000125644
TF	Factor: c-Ets-1(p54); motif: NCMGGAWGYN	0.000126165
TF	Factor: ELF2; motif: CCCGGAARYN; match class: 1	0.000131719
TF	Factor: E2F; motif: TTTSGCGS	0.000141115
TF	Factor: Elk-1:HOXB13; motif: ACCGGAAGTNGTAAAN	0.000153306
TF	Factor: BTEB2; motif: GCCCCRCCCH	0.000157796
TF	Factor: Hey2; motif: NNCACGYGNN	0.000159349
TF	Factor: GCMa:Erg; motif: ATGCGGGCGGAARKG	0.000160404
TF	Factor: Hey1; motif: NGCRCGYGYN	0.000166644
TF	Factor: Pet-1; motif: NACCGGAAGTN	0.000181075
TF	Factor: Kaiso; motif: GCMGGGRGCRGS	0.000189726
TF	Factor: ER81; motif: NNCCGGAAGYG; match class: 1	0.000196345
TF	Factor: CPBP; motif: SNCCCNN; match class: 1	0.000201246
TF	Factor: TEF-3:ER81; motif: ACCGGAAATRCC; match class: 1	0.000222102
TF	Factor: pax-6; motif: NYACGCNYSANYGMNCN; match class: 1	0.000275719
TF	Factor: E2F; motif: NNTTTCGCGCN	0.000291384
TF	Factor: ETS1; motif: GCCGGAWGTACTTCCGGN; match class: 1	0.000296231
TF	Factor: Sp1; motif: NWRGCCMCGCCCMCN	0.000300321
TF	Factor: E2F-1:DP-2; motif: TTTSSCGC	0.000302597
TF	Factor: Pax-5; motif: RRMSWGANWYCTNRAGCGKRACSRYNSM	0.00031508
TF	Factor: E2F-1; motif: TTTSGCGS	0.000335923
TF	Factor: Fli-1; motif: NACCGGAARTN; match class: 1	0.000336954
TF	Factor: TR4; motif: ACCCCGS	0.000355371
TF	Factor: YY1; motif: CAANATGGCGGC	0.000360677
TF	Factor: Sp1; motif: NGGGGGCGGGGYN; match class: 1	0.000362946
TF	Factor: E2F-6; motif: NGGGCGGGARRNN	0.000376897
TF	Factor: Fli-1; motif: NACCGGAWWTCCGGTY	0.000379376
TF	Factor: GKLF; motif: GCCMCRCCCNNN; match class: 1	0.00038347
TF	Factor: ETV7; motif: NNSCGGAAGTR; match class: 1	0.000403178
TF	Factor: CP2; motif: NRRRCCGGCYNRARCCGGNN	0.000422484
TF	Factor: Pet-1; motif: GCNGGAAGYG	0.000434527
TF	Factor: GABP-alpha; motif: CACTTCCGG; match class: 1	0.000468778
TF	Factor: Elf-1; motif: RANSMGGAAGTR	0.000469386
TF	Factor: CPBP; motif: NGGGCGG	0.000509151
TF	Factor: Sp2; motif: WGGGCGG	0.000509151
TF	Factor: Sp6; motif: WGGGCGG	0.000509151
TF	Factor: Erg; motif: NACCGGATATCCGGTN	0.000514188
TF	Factor: Pax-3; motif: NNNNNNCGTCACGSTYNNNNN; match class: 1	0.000586824
TF	Factor: ELF5; motif: ANSMGGAAGTN; match class: 1	0.000620422
TF	Factor: BTEB2; motif: RGGGNGKGGN	0.00064069
TF	Factor: HOXB2:PEA3; motif: ACCGGAAATGRN; match class: 1	0.000699915
TF	Factor: Sp1; motif: NWRGCCACGCCCMCN; match class: 1	0.000737884
TF	Factor: HES-1; motif: GGCRCGTGNC	0.000752552
TF	Factor: GABPalpha_GABPbeta; motif: CTTCCKGY	0.000754454
TF	Factor: AP-2gamma:Elk-1; motif: NGCCKNRGGSGRCGGAAGTG	0.000811483
TF	Factor: SP2; motif: GNNGGGGGCGGGGSN	0.000844277
TF	Factor: Sp1; motif: NNGGGGCGGGGNN; match class: 1	0.000878628
TF	Factor: rfx3:SRF; motif: TRGCAACNNNNNCCNWATANGGN	0.00100455
TF	Factor: ATF-3; motif: GGCGCSSNSNGRTSACGTSA; match class: 1	0.00103419
TF	Factor: CHD2; motif: TCTCGCGAG; match class: 1	0.0011446
TF	Factor: Erg; motif: NACCGGATATCCGGTN; match class: 1	0.00118014
TF	Factor: AP-2rep; motif: NGGGGCGGGGC	0.00121799
TF	Factor: Sp1; motif: CCCCGCCCCN	0.00123555
TF	Factor: Sp1; motif: NWRGCCMCGCCCMCN; match class: 1	0.00124887
TF	Factor: Elf5; motif: CSMGGAARNN; match class: 1	0.00125008
TF	Factor: Elk-1:OC-2; motif: RCCGGAASCGATCGATNN	0.00128348
TF	Factor: Kaiso; motif: TCTCGCGAG	0.00134484
TF	Factor: Elk-1; motif: NACMGGAAGTN; match class: 1	0.00137539
TF	Factor: ZNF501; motif: NNNCSACGCGAACAC	0.00138423
TF	Factor: Sp1; motif: GGGGCGGGGT	0.00140066
TF	Factor: Elk-1:HOXA1; motif: ACCGGAAGTAATTA	0.00149447
TF	Factor: ATF2; motif: VGTGACGTMACN	0.00177084
TF	Factor: Hey2; motif: NNCACGYGNN; match class: 1	0.00181375
TF	Factor: E2F; motif: TTTCGCGC	0.00191373
TF	Factor: BTEB2; motif: NCCACRCCCN	0.00192722
TF	Factor: BTEB4; motif: NCCACGCCCM; match class: 1	0.00194539
TF	Factor: nerf; motif: AAMCCGGAAGTN	0.00201561
TF	Factor: Sp1; motif: GGGGCGGGGC; match class: 1	0.00202561
TF	Factor: ELF5; motif: ANSMGGAAGTN	0.00202822
TF	Factor: PAX5; motif: RNGCGTGACCNN; match class: 1	0.00205374
TF	Factor: E2F3; motif: NNRGMKGGAR	0.00208122
TF	Factor: ESE-1; motif: ACCCGGAAGTRNNNNNNNNWWWW	0.00210378
TF	Factor: YY1; motif: GCCGCCATNTTGNNNNNGGNCN	0.00223004
TF	Factor: Pax-3; motif: NNNNNNCGTCACGSTYNNNNN	0.00227546
TF	Factor: KLF3; motif: NNNNNNGGGCGGGGCNNGN; match class: 1	0.00231982
TF	Factor: GKLF; motif: WGGGYGKGGC	0.0024024
TF	Factor: CREB1; motif: TKACGTCAYNN	0.00246031
TF	Factor: Elk-1:Pax-1; motif: ACCGGAACTACGCWTSANTG	0.00254817
TF	Factor: GABP; motif: CACTTCCGGNNN; match class: 1	0.00255301
TF	Factor: Sp2; motif: NTWAGTCCCGCCCMCTT	0.00261945
TF	Factor: Pet-1; motif: GCNGGAAGYG; match class: 1	0.00273129
TF	Factor: ELFR; motif: NANSCGGAAGTN	0.00306487
TF	Factor: SAP1A; motif: NCCGGAARYN	0.00316278
TF	Factor: Pax-5; motif: NGTCACGCWTSANTGMNY; match class: 1	0.00320084
TF	Factor: GABP-ALPHA; motif: RCCGGAARTNN; match class: 1	0.00336577
TF	Factor: Fli-1; motif: NACCGGAWWTCCGGTY; match class: 1	0.00339716
TF	Factor: FLI-1; motif: CMGGAWGTSAN	0.00340534
TF	Factor: SAP-1; motif: NRNCGGAWRYN	0.00377449
TF	Factor: etv3; motif: NNCGGAARTGSCAYTTCCGNT	0.00388456
TF	Factor: HES-7; motif: GNCACGYGNN; match class: 1	0.00410637
TF	Factor: NRF-1; motif: GCGCMTGCGCN	0.00424104
TF	Factor: pax-2; motif: NCGTCACGCNYSRNYGCNYN	0.00430956
TF	Factor: FLI-1; motif: CMGGAWGTSAN; match class: 1	0.00431733
TF	Factor: pax-6; motif: NYACGCNTSRNYGCNYN	0.00443943
TF	Factor: Tel-2; motif: YTACTTCCTG; match class: 1	0.00446499
TF	Factor: nerf; motif: NANSCGGAAGTN	0.00456771
TF	Factor: E2F; motif: TTTSGCGC	0.00471706
TF	Factor: SP1; motif: GGCCCCGCCCCCN; match class: 1	0.00476898
TF	Factor: ATF; motif: CNSTGACGTNNNYC; match class: 1	0.0048081
TF	Factor: YY1; motif: NAANATGGCGNNN	0.00482476
TF	Factor: NRF-1; motif: CNCTGCGCATGCGC; match class: 1	0.00489678
TF	Factor: E2F; motif: TTTSGCGS	0.00496922
TF	Factor: Cdx-2; motif: NRTCGTAANNNN; match class: 1	0.00525593
TF	Factor: GABP; motif: VCCGGAAGNGCR; match class: 1	0.00565261
TF	Factor: nerf; motif: NANGCGGAAGTR	0.0057453
TF	Factor: CREB1; motif: NNNNSSGGCGCSSNNNNRTGACGTCAC	0.00581131
TF	Factor: E2F1; motif: NNNNNGCGSSAAAN	0.00585883
TF	Factor: E2F-7; motif: GRGGCGGGAANNN; match class: 1	0.00611598
TF	Factor: KLF17; motif: NGGGCGG	0.00672922
TF	Factor: LKLF; motif: NGGGCGG	0.00672922
TF	Factor: sp4; motif: NNNGCYCCGCCCCCY; match class: 1	0.0068732
TF	Factor: RUNX2; motif: NRACCGCAAACCGCAN	0.00755926
TF	Factor: TFAP2A; motif: NGCCCYNNGGGCN	0.00784014
TF	Factor: Elk-1; motif: NAAACMGGAAGTNCVH; match class: 1	0.00809538
TF	Factor: elf5; motif: GAMCCGGAAGTN	0.00811011
TF	Factor: AP-2alpha; motif: NGCCYSNNGSN	0.00813533
TF	Factor: Sp2; motif: GYCCCGCCYCYNNNN	0.00847579
TF	Factor: ELFR; motif: NANGMGGAAGTN	0.00855639
TF	Factor: Elk-1:TBR2; motif: TNRCACCGGAAGN; match class: 1	0.0088283
TF	Factor: YY1; motif: GGCSGCCATTTTGN	0.00953249
TF	Factor: Sp2; motif: GGGGCGGGG	0.00964026
TF	Factor: TFAP2A; motif: NGCCCYNNGGGCN; match class: 1	0.00979983
TF	Factor: XBP-1; motif: WNNGMCACGTC	0.0104754
TF	Factor: Elk-1:OC-2; motif: RCCGGAASCGATCGATNN; match class: 1	0.0104776
TF	Factor: Pax-5; motif: SCNNGGGCARCNRAGCGWGAC	0.0107998
TF	Factor: KLF17; motif: NGMCMCRCCCTN	0.0114484
TF	Factor: CREM; motif: TGACGTCASYN; match class: 1	0.0119096
TF	Factor: HOXB2:PEA3; motif: ACCGGAAATGRN	0.0122209
TF	Factor: Sp1; motif: GGGGCGGGGT; match class: 1	0.0131997
TF	Factor: SP1; motif: NCCCCKCCCCC	0.0133507
TF	Factor: Ikaros; motif: TGGGAGN	0.0135024
TF	Factor: YY1; motif: NYNKCCATNTT	0.0138561
TF	Factor: BTEB1; motif: GGGGGCGGGGCNGSGGGNGS	0.0141338
TF	Factor: rfx3:SRF; motif: TRGCAACNNNNNCCNWATANGGN; match class: 1	0.0144403
TF	Factor: Fli-1; motif: NACCGGATATCCGGTN; match class: 1	0.0144621
TF	Factor: KLF15; motif: RCCMCRCCCMCN	0.0154538
TF	Factor: BCL-11A; motif: CSTAMGGA	0.01555
TF	Factor: SREBP-1; motif: RTCRCGTGAY	0.0160726
TF	Factor: YY1; motif: NGCCGCCATYTTGN	0.0164304
TF	Factor: E2F-4; motif: TTTTGGCGCCAWWN; match class: 1	0.0174545
TF	Factor: Pet-1; motif: NACCGGAAGTN	0.0175783
TF	Factor: YY2; motif: NNATGGCGGCN	0.0180402
TF	Factor: Erg; motif: NACCGGATATCCGGTN; match class: 1	0.0183465
TF	Factor: TEF-3:Fli-1; motif: ACCGGAAATGCC	0.0191671
TF	Factor: YY1; motif: NNNNAARATGGNNNN	0.0194062
TF	Factor: Sp3; motif: NGCCACGCCCMCN	0.0195499
TF	Factor: ER81; motif: NACCGGAAGTN; match class: 1	0.0203094
TF	Factor: ER71:E2A; motif: CASSTGNACCGGAWRYN	0.0221836
TF	Factor: ELK1; motif: NACTTCCGSCGGAAGYN; match class: 1	0.0222883
TF	Factor: Pet-1; motif: ACCGGAWRTN; match class: 1	0.0223991
TF	Factor: KLF3; motif: GRCCRCGCCCN	0.022414
TF	Factor: YY1; motif: GCCATNTTN	0.0232007
TF	Factor: Fli-1; motif: NACCGGATATCCGGTN	0.0232825
TF	Factor: Hey1; motif: NGCRCGYGYN; match class: 1	0.0236629
TF	Factor: GCMa:Erg; motif: ATGCGGGCGGAARKG; match class: 1	0.0242192
TF	Factor: nerf; motif: NACCCGGAAGTR	0.0268928
TF	Factor: YY1; motif: CAARATGGCGGC	0.0283828
TF	Factor: CPBP; motif: GNNRGGGHGGGGNNGGGRN	0.0286193
TF	Factor: Sp2; motif: NTAAGYCCCGCCCMCTN; match class: 1	0.0286272
TF	Factor: GKLF; motif: WGGGYGKGGC; match class: 1	0.0293372
TF	Factor: YY1; motif: CAARATGGCNGC	0.0294808
TF	Factor: pax-2; motif: NCGTCACGCNYSRNYGCNYN; match class: 1	0.0296915
TF	Factor: SAP-1; motif: NRCCGGAWGYN; match class: 1	0.0316219
TF	Factor: NRF-1; motif: SYGCGCMTGCGCRNNGSN; match class: 1	0.0338591
TF	Factor: ATF-3; motif: GGTSACGTGAN	0.0339348
TF	Factor: Egr-1; motif: ACCGCCC	0.0345971
TF	Factor: E2F-1; motif: TTTSGCGCGMNR	0.0366897
TF	Factor: SP2; motif: GNNGGGGGCGGGGSN; match class: 1	0.0381746
TF	Factor: Elk-1:T-bet; motif: TCACACCGGAAGNN; match class: 1	0.0392574
TF	Factor: NRF-1; motif: CNSTGCGCATGCGCNNS; match class: 1	0.0396177
TF	Factor: SP1; motif: RCCMCRCCCMC; match class: 1	0.0397269
TF	Factor: CREB,; motif: NTGACGTNA	0.0401437
TF	Factor: KLF15; motif: RCCMCRCCCMCN; match class: 1	0.0403399
TF	Factor: Erg; motif: NACCGGAWWTCCGGTN	0.0423244
TF	Factor: Fli-1; motif: RCMGGAAGYGNNN; match class: 1	0.0439315
TF	Factor: BTEB4; motif: RCCACGCCCC	0.044839
TF	Factor: GABP-alpha; motif: NACCGGAAGTN; match class: 1	0.0457749
TF	Factor: Erm; motif: NRCMGGAAGTN; match class: 1	0.0472293
TF	Factor: CREM; motif: TGACGTCASYN	0.0472424
TF	Factor: Erg; motif: NACCGGATATCCGGTN	0.0499312
WP	mRNA processing	4.6163e-06
WP	Nonalcoholic fatty liver disease	0.0015683
WP	Ferroptosis	0.0300781

## Sheet: High IR Terms (Fig.2)
source	term_name	p_value
CORUM	Ribosome, cytoplasmic	0.0037176
CORUM	60S ribosomal subunit, cytoplasmic	0.0117821
GO:BP	regulation of IRE1-mediated unfolded protein response	0.00894419
GO:BP	biosynthetic process	0.016378
GO:BP	organic substance biosynthetic process	0.0191354
GO:BP	cellular biosynthetic process	0.0240928
GO:BP	IRE1-mediated unfolded protein response	0.0307715
GO:BP	cytoplasmic translation	0.0457536
GO:BP	positive regulation of IRE1-mediated unfolded protein response	0.048633
GO:CC	cytoplasm	0.000563192
GO:CC	cytosolic ribosome	0.000697861
GO:CC	ribosomal subunit	0.00116177
GO:CC	large ribosomal subunit	0.00148372
GO:CC	cytosolic large ribosomal subunit	0.00173838
GO:CC	organelle envelope	0.0100038
GO:CC	envelope	0.0100038
GO:CC	nucleoplasm	0.0103254
GO:CC	mitochondrial membrane	0.0137176
GO:CC	intracellular anatomical structure	0.0212434
GO:CC	mitochondrial envelope	0.031779
GO:CC	polysomal ribosome	0.0388107
GO:MF	protein binding	5.68871e-06
HPA	seminal vesicle; glandular cells[≥Low]	2.54393e-10
HPA	seminal vesicle	2.54393e-10
HPA	kidney; cells in tubules[≥Low]	1.34466e-09
HPA	thyroid gland; glandular cells[≥Medium]	6.10147e-09
HPA	pancreas; exocrine glandular cells[≥Low]	6.15258e-09
HPA	placenta	1.19075e-08
HPA	rectum	1.62984e-08
HPA	adrenal gland; glandular cells[≥Low]	1.77469e-08
HPA	adrenal gland	1.94003e-08
HPA	prostate; glandular cells[≥Low]	2.24122e-08
HPA	prostate	2.24122e-08
HPA	urinary bladder	2.3921e-08
HPA	urinary bladder; urothelial cells[≥Low]	2.3921e-08
HPA	stomach 1; glandular cells[≥Medium]	2.58327e-08
HPA	rectum; glandular cells[≥Low]	2.87787e-08
HPA	fallopian tube	3.51567e-08
HPA	epididymis	3.76382e-08
HPA	epididymis; glandular cells[≥Low]	3.76382e-08
HPA	stomach 2; glandular cells[≥Medium]	4.46244e-08
HPA	salivary gland; glandular cells[≥Medium]	4.48537e-08
HPA	duodenum; glandular cells[≥Low]	4.92615e-08
HPA	smooth muscle	5.04051e-08
HPA	smooth muscle; smooth muscle cells[≥Low]	5.04051e-08
HPA	colon; glandular cells[≥Low]	5.62591e-08
HPA	kidney	6.31268e-08
HPA	thyroid gland	6.39185e-08
HPA	thyroid gland; glandular cells[≥Low]	6.39185e-08
HPA	stomach 1; glandular cells[≥Low]	7.55253e-08
HPA	stomach 1	7.55253e-08
HPA	adrenal gland; glandular cells[≥Medium]	8.46787e-08
HPA	pancreas; exocrine glandular cells[≥Medium]	8.70426e-08
HPA	pancreas	8.98948e-08
HPA	endometrium 1; glandular cells[≥Low]	1.11134e-07
HPA	seminal vesicle; glandular cells[≥Medium]	1.20196e-07
HPA	small intestine; glandular cells[≥Low]	1.55668e-07
HPA	kidney; cells in tubules[≥Medium]	1.9348e-07
HPA	stomach 2; glandular cells[≥Low]	2.16836e-07
HPA	stomach 2	2.16836e-07
HPA	tonsil; squamous epithelial cells[≥Low]	2.75576e-07
HPA	pancreas; pancreatic endocrine cells[≥Low]	3.99058e-07
HPA	endometrium 1	4.69865e-07
HPA	cerebral cortex	5.50896e-07
HPA	cervix; squamous epithelial cells[≥Medium]	1.18076e-06
HPA	salivary gland	1.2817e-06
HPA	salivary gland; glandular cells[≥Low]	1.2817e-06
HPA	duodenum	1.35403e-06
HPA	colon	1.51393e-06
HPA	pancreas; exocrine glandular cells[High]	1.52323e-06
HPA	testis	1.64638e-06
HPA	prostate; glandular cells[≥Medium]	2.21553e-06
HPA	breast	2.25667e-06
HPA	skin 1; melanocytes[≥Low]	2.86118e-06
HPA	rectum; glandular cells[≥Medium]	3.12407e-06
HPA	skin 1	4.45132e-06
HPA	small intestine	4.88795e-06
HPA	liver; hepatocytes[≥Low]	5.30287e-06
HPA	heart muscle; cardiomyocytes[≥Medium]	6.6314e-06
HPA	tonsil	7.58863e-06
HPA	gallbladder	7.82639e-06
HPA	gallbladder; glandular cells[≥Low]	7.82639e-06
HPA	parathyroid gland; glandular cells[≥Low]	9.16059e-06
HPA	parathyroid gland	9.16059e-06
HPA	appendix; glandular cells[≥Medium]	9.41635e-06
HPA	appendix; glandular cells[≥Low]	1.01172e-05
HPA	testis; Leydig cells[≥Medium]	1.02992e-05
HPA	tonsil; non-germinal center cells[≥Low]	1.03624e-05
HPA	lung; macrophages[≥Low]	1.51107e-05
HPA	cervix; squamous epithelial cells[≥Low]	1.63569e-05
HPA	lung	1.8874e-05
HPA	breast; glandular cells[≥Low]	2.04087e-05
HPA	endometrium 2; glandular cells[≥Low]	2.3245e-05
HPA	gallbladder; glandular cells[≥Medium]	2.42169e-05
HPA	epididymis; glandular cells[≥Medium]	2.61945e-05
HPA	duodenum; glandular cells[≥Medium]	2.84672e-05
HPA	parathyroid gland; glandular cells[≥Medium]	2.95285e-05
HPA	placenta; trophoblastic cells[≥Medium]	3.29048e-05
HPA	bronchus	3.33557e-05
HPA	liver; hepatocytes[≥Medium]	3.54002e-05
HPA	heart muscle	3.58411e-05
HPA	heart muscle; cardiomyocytes[≥Low]	3.58411e-05
HPA	endometrium 2; glandular cells[≥Medium]	3.77255e-05
HPA	kidney; cells in glomeruli[≥Low]	3.89369e-05
HPA	duodenum; glandular cells[High]	4.33982e-05
HPA	appendix	4.87357e-05
HPA	esophagus	4.99799e-05
HPA	esophagus; squamous epithelial cells[≥Low]	4.99799e-05
HPA	small intestine; glandular cells[≥Medium]	5.45422e-05
HPA	skin 1; melanocytes[≥Medium]	5.46252e-05
HPA	cerebral cortex; endothelial cells[≥Low]	5.51294e-05
HPA	endometrium 2	5.60773e-05
HPA	colon; endothelial cells[≥Low]	5.9859e-05
HPA	cerebellum; Purkinje cells[≥Low]	6.08328e-05
HPA	skin 2	6.58584e-05
HPA	tonsil; germinal center cells[≥Low]	6.64698e-05
HPA	colon; glandular cells[High]	6.77119e-05
HPA	nasopharynx; respiratory epithelial cells[High]	7.12488e-05
HPA	lymph node; non-germinal center cells[≥Medium]	7.96471e-05
HPA	nasopharynx	9.74953e-05
HPA	cerebellum	0.000117167
HPA	cerebellum; Purkinje cells[≥Medium]	0.000152507
HPA	cerebral cortex; glial cells[≥Low]	0.000154031
HPA	bronchus; respiratory epithelial cells[≥Medium]	0.000174323
HPA	bone marrow; hematopoietic cells[≥Low]	0.000189081
HPA	bone marrow	0.000189081
HPA	cervix	0.000207662
HPA	spleen; cells in white pulp[≥Low]	0.000226655
HPA	ovary	0.000227914
HPA	testis; Leydig cells[≥Low]	0.000276654
HPA	stomach 1; glandular cells[High]	0.000290613
HPA	fallopian tube; glandular cells[≥Low]	0.00036239
HPA	lymph node; non-germinal center cells[≥Low]	0.000372368
HPA	small intestine; glandular cells[High]	0.000375574
HPA	placenta; trophoblastic cells[≥Low]	0.000376339
HPA	skin 1; Langerhans[≥Low]	0.000377881
HPA	urinary bladder; urothelial cells[≥Medium]	0.00038917
HPA	bronchus; respiratory epithelial cells[High]	0.000421795
HPA	colon; glandular cells[≥Medium]	0.000471934
HPA	kidney; cells in tubules[High]	0.000498568
HPA	fallopian tube; glandular cells[≥Medium]	0.000509689
HPA	spleen; cells in white pulp[≥Medium]	0.000548169
HPA	liver	0.000553495
HPA	endometrium 1; glandular cells[≥Medium]	0.000556301
HPA	endometrium 1; glandular cells[High]	0.000597345
HPA	appendix; glandular cells[High]	0.00067028
HPA	lymph node	0.000679716
HPA	breast; glandular cells[≥Medium]	0.000913582
HPA	oral mucosa	0.000958656
HPA	oral mucosa; squamous epithelial cells[≥Low]	0.000958656
HPA	ovary; ovarian stroma cells[≥Low]	0.00115316
HPA	skin 1; Langerhans[≥Medium]	0.00116021
HPA	endometrium 1; cells in endometrial stroma[≥Low]	0.00116439
HPA	nasopharynx; respiratory epithelial cells[≥Medium]	0.00117149
HPA	spleen	0.00119881
HPA	skin 1; fibroblasts[≥Low]	0.00124893
HPA	cervix; glandular cells[≥Low]	0.00126719
HPA	vagina; squamous epithelial cells[≥Low]	0.00142667
HPA	vagina	0.00142667
HPA	skeletal muscle	0.00142829
HPA	skeletal muscle; myocytes[≥Low]	0.00142829
HPA	skin 1; keratinocytes[≥Low]	0.00157889
HPA	cerebellum; Purkinje cells[High]	0.00219578
HPA	breast; myoepithelial cells[≥Low]	0.00233746
HPA	skin 2; epidermal cells[≥Low]	0.00267481
HPA	nasopharynx; respiratory epithelial cells[≥Low]	0.00292244
HPA	gallbladder; glandular cells[High]	0.003004
HPA	rectum; glandular cells[High]	0.00309294
HPA	esophagus; squamous epithelial cells[≥Medium]	0.00328309
HPA	adrenal gland; glandular cells[High]	0.00328719
HPA	cerebral cortex; neuronal cells[≥Low]	0.00371071
HPA	seminal vesicle; glandular cells[High]	0.00427792
HPA	soft tissue 1	0.00428556
HPA	hippocampus; neuronal cells[≥Low]	0.00432594
HPA	pancreas; pancreatic endocrine cells[≥Medium]	0.00441341
HPA	bronchus; respiratory epithelial cells[≥Low]	0.00442903
HPA	lymph node; germinal center cells[≥Medium]	0.00452677
HPA	vagina; squamous epithelial cells[≥Medium]	0.00496649
HPA	soft tissue 2	0.00531764
HPA	placenta; decidual cells[≥Low]	0.00557529
HPA	colon; peripheral nerve/ganglion[≥Low]	0.00635531
HPA	lymph node; germinal center cells[≥Low]	0.00705645
HPA	placenta; decidual cells[≥Medium]	0.00719829
HPA	skin 2; epidermal cells[≥Medium]	0.00741241
HPA	cervix; glandular cells[High]	0.00770165
HPA	esophagus; squamous epithelial cells[High]	0.00834191
HPA	lung; macrophages[≥Medium]	0.00849427
HPA	cerebellum; cells in molecular layer[≥Low]	0.00883131
HPA	breast; myoepithelial cells[≥Medium]	0.00883842
HPA	smooth muscle; smooth muscle cells[≥Medium]	0.00891874
HPA	skin 1; keratinocytes[≥Medium]	0.00895544
HPA	skeletal muscle; myocytes[≥Medium]	0.00943113
HPA	endometrium 1; cells in endometrial stroma[≥Medium]	0.0100371
HPA	thyroid gland; glandular cells[High]	0.0116272
HPA	kidney; cells in glomeruli[≥Medium]	0.0117313
HPA	oral mucosa; squamous epithelial cells[High]	0.0131174
HPA	parathyroid gland; glandular cells[High]	0.0131494
HPA	caudate	0.0131925
HPA	urinary bladder; urothelial cells[High]	0.0136306
HPA	bone marrow; hematopoietic cells[≥Medium]	0.0140742
HPA	endometrium 2; cells in endometrial stroma[≥Low]	0.0152363
HPA	tonsil; germinal center cells[≥Medium]	0.0160445
HPA	caudate; neuronal cells[≥Medium]	0.0190964
HPA	skeletal muscle; myocytes[High]	0.0209167
HPA	hippocampus	0.02321
HPA	hippocampus; neuronal cells[≥Medium]	0.0234595
HPA	caudate; glial cells[≥Low]	0.0238676
HPA	tonsil; squamous epithelial cells[≥Medium]	0.0293265
HPA	breast; adipocytes[≥Low]	0.0303902
HPA	cerebellum; cells in molecular layer[≥Medium]	0.0312845
HPA	salivary gland; glandular cells[High]	0.0337482
HPA	colon; peripheral nerve/ganglion[≥Medium]	0.0338801
HPA	tonsil; non-germinal center cells[≥Medium]	0.0369451
HPA	epididymis; glandular cells[High]	0.038958
HPA	skin 1; Langerhans[High]	0.0398273
HPA	cerebral cortex; neuronal cells[≥Medium]	0.0400231
HPA	cervix; glandular cells[≥Medium]	0.0402912
HPA	heart muscle; cardiomyocytes[High]	0.0431256
HPA	liver; cholangiocytes[≥Low]	0.044936
KEGG	Ribosome	0.0012429
MIRNA	hsa-miR-665	0.00932221
MIRNA	hsa-miR-4419b	0.0171569
MIRNA	hsa-miR-4478	0.0176019
MIRNA	hsa-miR-3929	0.0176019
MIRNA	hsa-miR-6840-3p	0.0186692
MIRNA	hsa-miR-6769a-5p	0.0399781
REAC	Peptide chain elongation	5.89189e-05
REAC	Eukaryotic Translation Termination	8.60344e-05
REAC	Eukaryotic Translation Elongation	8.60344e-05
REAC	Translation	0.000210252
REAC	Eukaryotic Translation Initiation	0.00069175
REAC	Cap-dependent Translation Initiation	0.00069175
REAC	Viral mRNA Translation	0.00074307
REAC	Selenocysteine synthesis	0.00103469
REAC	Nonsense Mediated Decay (NMD) independent of the Exon Junction Complex (EJC)	0.0012137
REAC	Formation of a pool of free 40S subunits	0.00191654
REAC	Response of EIF2AK4 (GCN2) to amino acid deficiency	0.00191654
REAC	L13a-mediated translational silencing of Ceruloplasmin expression	0.00384752
REAC	GTP hydrolysis and joining of the 60S ribosomal subunit	0.0041089
REAC	SRP-dependent cotranslational protein targeting to membrane	0.0041089
REAC	Nonsense Mediated Decay (NMD) enhanced by the Exon Junction Complex (EJC)	0.00498471
REAC	Nonsense-Mediated Decay (NMD)	0.00498471
REAC	Selenoamino acid metabolism	0.00530951
REAC	Regulation of expression of SLITs and ROBOs	0.0124047
REAC	Influenza Viral RNA Transcription and Replication	0.0134871
REAC	Signaling by ROBO receptors	0.0139173
REAC	NOTCH2 Activation and Transmission of Signal to the Nucleus	0.0186422
REAC	Influenza Infection	0.0348516
REAC	Cellular response to starvation	0.0437126
TF	Factor: ZF5; motif: GGSGCGCGS; match class: 1	2.72122e-08
TF	Factor: Elf-1; motif: NANGCGGAAGTN	4.02124e-07
TF	Factor: E2F4; motif: YCCCGCCNCNNSSNNSNN; match class: 1	1.59682e-06
TF	Factor: ZF5; motif: GGSGCGCGS	8.48426e-06
TF	Factor: E2F-2; motif: GCGCGCGCNCS	1.11914e-05
TF	Factor: ZF5; motif: GSGCGCGR	1.48774e-05
TF	Factor: E2F4; motif: YCCCGCCNCNNSSNNSNN	1.82625e-05
TF	Factor: E2F-2; motif: GCGCGCGCNCS; match class: 1	1.94361e-05
TF	Factor: E2F-2; motif: NWTTTGGCGCCAWWNN; match class: 1	3.60458e-05
TF	Factor: Elk-1; motif: NRCCGGAAGTN; match class: 1	4.57886e-05
TF	Factor: E2F-3:HES-7; motif: NNNSGCGCSNNNNNCRCGYGNN	5.33953e-05
TF	Factor: ESE-1; motif: NWTRCGGAWGCN; match class: 1	6.78655e-05
TF	Factor: c-Ets-1; motif: NNNRCCGGAWRYNNNN; match class: 1	7.61756e-05
TF	Factor: Erg; motif: NACCGGAARYN; match class: 1	9.18238e-05
TF	Factor: ELF1; motif: NNNASCCGGAAGTGGNNNN	9.51725e-05
TF	Factor: E2F-2; motif: GCGCGCGCGYW	9.58555e-05
TF	Factor: Elf-1; motif: NANSCGGAAGTR	0.000105166
TF	Factor: ETS1; motif: ACCGGAARYN; match class: 1	0.000112616
TF	Factor: FLI1; motif: ACCGGAARTN; match class: 1	0.000114731
TF	Factor: ERG; motif: ACCGGAARTN; match class: 1	0.000115013
TF	Factor: Elk-1; motif: NNNNCCGGAARTNN; match class: 1	0.000121904
TF	Factor: Elk-1; motif: NNCCGGAAGTN; match class: 1	0.000173981
TF	Factor: Fli-1; motif: NACCGGAARTN; match class: 1	0.000259403
TF	Factor: E2F-1:HES-7; motif: GGCRCGTGSYNNWNGGCGCSM; match class: 1	0.000267232
TF	Factor: Elf-1; motif: NANGCGGAAGTR	0.000288223
TF	Factor: SAP-1; motif: NRCCGGAWGYN	0.000298699
TF	Factor: E2F-3:TBR2; motif: ANGTGYKANGGCGCSTTNNCRNNT	0.000298922
TF	Factor: ETV3; motif: ACCGGAAGTN	0.000317694
TF	Factor: Fli-1; motif: NACCGGAARTN; match class: 1	0.000395998
TF	Factor: FLI-1; motif: NAYTTCCGGT; match class: 1	0.000456376
TF	Factor: ETV7; motif: NCCGGAANNN; match class: 1	0.000471149
TF	Factor: ETV5; motif: NCCGGAWGYN	0.000532081
TF	Factor: E2F-1:HES-7; motif: GGCRCGTGSYNNWNGGCGCSM	0.000534132
TF	Factor: GKLF; motif: GCCMCRCCCNNN; match class: 1	0.000543713
TF	Factor: ER71:Pax-5; motif: ACCGGAACYACGCWTSANTG; match class: 1	0.000557986
TF	Factor: nerf; motif: NRRNSCGGAAGNRNNNN; match class: 1	0.000566292
TF	Factor: SAP-1; motif: NNCCGGAAGTGN; match class: 1	0.000613262
TF	Factor: GABP-alpha; motif: NNNRCCGGAAGTGN	0.000672207
TF	Factor: E2F-4; motif: SNGGGCGGGAANN; match class: 1	0.000698817
TF	Factor: ELF4; motif: NCCACTTCCGGNNNN; match class: 1	0.000723713
TF	Factor: GABP-alpha; motif: CACTTCCGG	0.000881461
TF	Factor: PEA3; motif: NACCGGAAGTN; match class: 1	0.000907057
TF	Factor: E2F; motif: GGCGSG	0.00090859
TF	Factor: Net; motif: NRCCGGAAGTN	0.000918223
TF	Factor: E2F-3:HES-7; motif: NNNSGCGCSNNNNNCRCGYGNN; match class: 1	0.00106426
TF	Factor: FLI-1; motif: CMGGAWGTSAN; match class: 1	0.00113679
TF	Factor: GABP-alpha; motif: CTTCCK; match class: 1	0.00116652
TF	Factor: E2F-2; motif: NWTTTGGCGCCAWWNN	0.00125487
TF	Factor: Elk-1; motif: RCCGGAAGTGN; match class: 1	0.00130849
TF	Factor: Erg; motif: NACCGGAARTN; match class: 1	0.00134852
TF	Factor: PEA3; motif: NACCGGAAGTN; match class: 1	0.00157165
TF	Factor: Elk-1; motif: NRSCGGAAGNN	0.00195112
TF	Factor: Erg; motif: ACCGGAAGTN; match class: 1	0.00196672
TF	Factor: ELK4; motif: NCRCTTCCGGN	0.00202473
TF	Factor: etv3; motif: ACCGGAAGYN	0.00239058
TF	Factor: GABP-alpha; motif: CTTCCK	0.00240046
TF	Factor: AP-2gamma:Elk-1; motif: NGCCKNRGGSGRCGGAAGTG; match class: 1	0.00250989
TF	Factor: ER81; motif: NNCCGGAAGYG	0.00257664
TF	Factor: Elf-1; motif: NANCCGGAAGTN; match class: 1	0.00263869
TF	Factor: GABPalpha; motif: RCCGGAWRYN	0.00266122
TF	Factor: KLF15; motif: RCCACGCCCCCC; match class: 1	0.00283772
TF	Factor: SAP-1; motif: ACCGGAAGTNN	0.00284791
TF	Factor: ER81; motif: RCCGGAARYN; match class: 1	0.00291021
TF	Factor: Elk-1; motif: AACCGGAAGTR	0.00294569
TF	Factor: Elf-1; motif: NAMCCGGAAGTN; match class: 1	0.0032626
TF	Factor: E2F-1:Elk-1; motif: SGCGCSNNAMCGGAAGT	0.00330309
TF	Factor: ER81; motif: RCCGGAARYN	0.00333536
TF	Factor: nerf; motif: NRRNSCGGAAGNRNNNN	0.00335778
TF	Factor: EKLF; motif: NGGGYGKGGCNNGG	0.00343613
TF	Factor: Erm; motif: NNSCGGAWGYN; match class: 1	0.00372817
TF	Factor: E2F-3:TBR2; motif: ANGTGYKANGGCGCSTTNNCRNNT; match class: 1	0.00374214
TF	Factor: pax-6; motif: NYACGCNTSRNYGCNYN; match class: 1	0.00389774
TF	Factor: Elf-1; motif: NANCCGGAAGTN	0.00398574
TF	Factor: pax-6; motif: NYACGCNYSANYGMNCN	0.00406199
TF	Factor: GABP-ALPHA; motif: RCCGGAARTNN	0.00427008
TF	Factor: Net; motif: NACCGGAAGTN	0.00446697
TF	Factor: ELF4; motif: NCCACTTCCGGNNNN	0.00485173
TF	Factor: c-ets-1; motif: ACCGGAWGTN; match class: 1	0.00486303
TF	Factor: EHF; motif: CSCGGAARTN	0.00549459
TF	Factor: Elf-1; motif: NAANCMGGAAGTGN; match class: 1	0.00554675
TF	Factor: ELK1; motif: ACCGGAAGTN; match class: 1	0.00567568
TF	Factor: TEL1; motif: CNCGGAANNN; match class: 1	0.0057218
TF	Factor: SP1; motif: GGCCCCGCCCCCN; match class: 1	0.00590915
TF	Factor: ER71; motif: NACCGGAARTN	0.00605219
TF	Factor: Sp1; motif: NWRGCCACGCCCMCN	0.00614495
TF	Factor: ERM; motif: NNCACTTCCGGNN; match class: 1	0.00632449
TF	Factor: ER81; motif: NNCCGGAWGYN; match class: 1	0.00641094
TF	Factor: E2F-2; motif: GCGCGCGCGYW; match class: 1	0.00655701
TF	Factor: Elk-1:Pax-5; motif: ACCGGAACYACGCWTSANYG; match class: 1	0.00815955
TF	Factor: Elf-1; motif: NANCCGGAAGTN	0.00819016
TF	Factor: ELF1; motif: NCCGGAARTN	0.00831341
TF	Factor: GKLF; motif: GCCMCRCCCNNN	0.00841379
TF	Factor: Churchill; motif: CGGGNN	0.00880588
TF	Factor: c-ets-2; motif: ACCGGAWRTN; match class: 1	0.00925796
TF	Factor: GABP; motif: CACTTCCGGNNN	0.00957587
TF	Factor: Elf-1; motif: NAMCCGGAAGTN	0.00963812
TF	Factor: E2F-4; motif: SNGGGCGGGAANN	0.00982064
TF	Factor: ELF1; motif: NCCGGAARTN; match class: 1	0.010043
TF	Factor: ERG; motif: ACCGGAART; match class: 1	0.0100741
TF	Factor: Erm; motif: NRCMGGAAGTN	0.010577
TF	Factor: Elk-1; motif: AACCGGAAGTR; match class: 1	0.0108963
TF	Factor: PUR1; motif: GGGNCAGNN	0.0116288
TF	Factor: Tax/CREB; motif: GGGGGTTGACGYANA	0.0124047
TF	Factor: ETV4; motif: ACCGGAAGTN; match class: 1	0.0126911
TF	Factor: ELF4; motif: NCCGGAARTN	0.0127951
TF	Factor: ELK1; motif: ACCGGAAGTN	0.0129944
TF	Factor: ESE-1; motif: NWTRCGGAWGCN	0.0133629
TF	Factor: ELF2; motif: CCCGGAARYN	0.0135832
TF	Factor: E2F-1; motif: WWTGGCGCCAAA	0.0137674
TF	Factor: Sp1; motif: NWRGCCACGCCCMCN; match class: 1	0.0142795
TF	Factor: Sp1; motif: NWRGCCMCGCCCMCN; match class: 1	0.0147955
TF	Factor: ERF; motif: ACCGGAARYN	0.0147955
TF	Factor: pax-6; motif: NYACGCNTSANYGCNYN; match class: 1	0.0160436
TF	Factor: ZF5; motif: GSGCGCGR; match class: 1	0.0166187
TF	Factor: SP4; motif: SCCCCGCCCCS	0.0169167
TF	Factor: ELK-1; motif: ACCGGAAGTN; match class: 1	0.0170581
TF	Factor: E2F-1:TBR2; motif: NGGTGNNANGGCGCNNTNNCRNNN	0.0177122
TF	Factor: Elk-1; motif: NACMGGAAGTN; match class: 1	0.0177404
TF	Factor: FEV; motif: ACCGGAAGTN	0.0180395
TF	Factor: nerf; motif: NNNCCGGAAGTGN	0.0187107
TF	Factor: PEA3; motif: RCCGGAAGYN; match class: 1	0.0195171
TF	Factor: ETV5; motif: NNACTTCCGNN; match class: 1	0.0198745
TF	Factor: E2F1; motif: GSGCGGGAAN	0.0199106
TF	Factor: GABP-alpha; motif: NRCCGGAAGTN	0.0213763
TF	Factor: Erm; motif: NNSCGGAWGYN	0.0216826
TF	Factor: EHF; motif: CSCGGAARTN; match class: 1	0.0234632
TF	Factor: BTEB2; motif: GCCCCRCCCH	0.0241123
TF	Factor: Fli-1; motif: ACCGGAAGYN; match class: 1	0.0244262
TF	Factor: Elf-1; motif: NNANCCGGAAGTGS	0.0246506
TF	Factor: Pet-1; motif: ACCGGAWRTN	0.0253056
TF	Factor: ER71; motif: ACCGGAARYN; match class: 1	0.025611
TF	Factor: Elf-1; motif: AWCCCGGAAGTN; match class: 1	0.0281115
TF	Factor: ELK3; motif: ACCGGAAGTN	0.0293182
TF	Factor: MAZ; motif: GGGMGGGGSSGGGGGGGGGGGG; match class: 1	0.0293811
TF	Factor: E2F-4; motif: NNTTCCCGCCNN; match class: 1	0.0295147
TF	Factor: GKLF; motif: WGGGYGKGGC	0.0296832
TF	Factor: GKLF; motif: WGGGYGKGGC; match class: 1	0.0316548
TF	Factor: Elk-1; motif: NNCCGGAAGTN	0.0319563
TF	Factor: Elk-1; motif: RACCGGAAGTR; match class: 1	0.0320417
TF	Factor: Elk-1; motif: NACMGGAAGTN	0.0343521
TF	Factor: GKLF; motif: NNCCMCRCCCN	0.0347446
TF	Factor: E2F-1; motif: NTTTTGGCGCCAWWWN	0.0375219
TF	Factor: p300; motif: ACNTCCG; match class: 1	0.0394413
TF	Factor: E2F-4; motif: NTTTCSCGCC	0.0403435
TF	Factor: MAZ; motif: GGGMGGGGSSGGGGGGGGGGGG	0.0404514
TF	Factor: GABP-alpha; motif: NACCGGAAGTN	0.0408288
TF	Factor: E2F-4; motif: NTTTCSCGCC; match class: 1	0.0408804
TF	Factor: ER81; motif: NACCGGAAGTN	0.0418764
TF	Factor: ETV7; motif: NNSCGGAAGTR	0.0424224
TF	Factor: pax-6; motif: NYACGCNTSANYGCNYN	0.0440312
TF	Factor: c-Ets-2; motif: NCCGGAAGTG; match class: 1	0.0452138
WP	Cytoplasmic ribosomal proteins	0.000180574

## Sheet: All Annotations (Fig. 5)
DrugName	ProvidedMOA	AnnotatedBroadGroup
adrenosterone	11-beta hydroxysteroid dehydrogenase inhibitor	Oxidative Stress Inhibitors
emodin	11-beta hydroxysteroid dehydrogenase inhibitor	Oxidative Stress Inhibitors
chenodeoxycholic-acid	11-beta hydroxysteroid dehydrogenase inhibitor, FXR agonist	Lipid Metabolism Inhibitor
trimetazidine	3-ketoacyl CoA thiolase inhibitor	Lipid Metabolism Inhibitor
chlormadinone-acetate	5 alpha reductase inhibitor	Growth Hormone Inhibitor
finasteride	5 alpha reductase inhibitor	Growth Hormone Inhibitor
dutasteride	5 alpha reductase inhibitor	Growth Hormone Inhibitor
ZM-306416	Abl kinase inhibitor, src inhibitor, VEGFR inhibitor	Growth Factor Inhibitors
KD-023	ACAT inhibitor	Lipid Metabolism Inhibitor
CI-976	ACAT inhibitor	Lipid Metabolism Inhibitor
hesperetin	ACAT inhibitor	Lipid Metabolism Inhibitor
NSC-4644	ACAT inhibitor, sterol regulatory element binding protein (SREBP) inhibitor	Lipid Metabolism Inhibitor
diphenidol	acetylcholine receptor agonist	Neurotransmitter Inhibitor
decamethonium	acetylcholine receptor agonist	Neurotransmitter Inhibitor
oxotremorine-m	acetylcholine receptor agonist	Neurotransmitter Inhibitor
5-methylfurmethiodide	acetylcholine receptor agonist	Neurotransmitter Inhibitor
arecaidine-but-2-ynyl-ester	acetylcholine receptor agonist	Neurotransmitter Inhibitor
pramiracetam	acetylcholine receptor agonist	Neurotransmitter Inhibitor
nicotine	acetylcholine receptor agonist	Neurotransmitter Inhibitor
rivanicline	acetylcholine receptor agonist	Neurotransmitter Inhibitor
arecoline	acetylcholine receptor agonist	Neurotransmitter Inhibitor
TC2559	acetylcholine receptor agonist	Neurotransmitter Inhibitor
SR-95639A	acetylcholine receptor agonist	Neurotransmitter Inhibitor
EVP-6124	acetylcholine receptor agonist	Neurotransmitter Inhibitor
UB-165	acetylcholine receptor agonist	Neurotransmitter Inhibitor
nornicotine	acetylcholine receptor agonist	Neurotransmitter Inhibitor
arecaidine-propargyl-ester	acetylcholine receptor agonist	Neurotransmitter Inhibitor
xanomeline	acetylcholine receptor agonist	Neurotransmitter Inhibitor
tremorine	acetylcholine receptor agonist	Neurotransmitter Inhibitor
anabasine	acetylcholine receptor agonist	Neurotransmitter Inhibitor
oxiracetam	acetylcholine receptor agonist	Neurotransmitter Inhibitor
piracetam	acetylcholine receptor agonist	Neurotransmitter Inhibitor
nefiracetam	acetylcholine receptor agonist, benzodiazepine receptor agonist	Neurotransmitter Inhibitor
CCMI	acetylcholine receptor allosteric modulator	Neurotransmitter Inhibitor
VU0238429	acetylcholine receptor allosteric modulator	Neurotransmitter Inhibitor
solifenacin-succinate	acetylcholine receptor antagonist	Neurotransmitter Inhibitor
mepenzolate	acetylcholine receptor antagonist	Neurotransmitter Inhibitor
fenoverine	acetylcholine receptor antagonist	Neurotransmitter Inhibitor
pozanicline	acetylcholine receptor antagonist	Neurotransmitter Inhibitor
homatropine	acetylcholine receptor antagonist	Neurotransmitter Inhibitor
cimetropium	acetylcholine receptor antagonist	Neurotransmitter Inhibitor
rocuronium	acetylcholine receptor antagonist	Neurotransmitter Inhibitor
scopolamine-n-oxide	acetylcholine receptor antagonist	Neurotransmitter Inhibitor
afloqualone	acetylcholine receptor antagonist	Neurotransmitter Inhibitor
AQ-RA741	acetylcholine receptor antagonist	Neurotransmitter Inhibitor
carbetapentane	acetylcholine receptor antagonist	Neurotransmitter Inhibitor
dimethindene-(S)-(+)	acetylcholine receptor antagonist	Neurotransmitter Inhibitor
zamifenacin	acetylcholine receptor antagonist	Neurotransmitter Inhibitor
scopolamine	acetylcholine receptor antagonist	Neurotransmitter Inhibitor
hyoscyamine	acetylcholine receptor antagonist	Neurotransmitter Inhibitor
isopropamide-iodide	acetylcholine receptor antagonist	Neurotransmitter Inhibitor
strychnine	acetylcholine receptor antagonist	Neurotransmitter Inhibitor
darifenacin	acetylcholine receptor antagonist	Neurotransmitter Inhibitor
DAU-5884	acetylcholine receptor antagonist	Neurotransmitter Inhibitor
methylatropine-nitrate	acetylcholine receptor antagonist	Neurotransmitter Inhibitor
pancuronium	acetylcholine receptor antagonist	Neurotransmitter Inhibitor
metocurine	acetylcholine receptor antagonist	Neurotransmitter Inhibitor
flavoxate	acetylcholine receptor antagonist	Neurotransmitter Inhibitor
aminopentamide	acetylcholine receptor antagonist	Neurotransmitter Inhibitor
metixene	acetylcholine receptor antagonist	Neurotransmitter Inhibitor
benztropine-mesylate	acetylcholine receptor antagonist	Neurotransmitter Inhibitor
gallamine-triethiodide	acetylcholine receptor antagonist	Neurotransmitter Inhibitor
orphenadrine	acetylcholine receptor antagonist	Neurotransmitter Inhibitor
tiquizium	acetylcholine receptor antagonist	Neurotransmitter Inhibitor
imidacloprid	acetylcholine receptor antagonist	Neurotransmitter Inhibitor
propantheline	acetylcholine receptor antagonist	Neurotransmitter Inhibitor
bifemelane	acetylcholine release enhancer	Neurotransmitter Enhancer
MR-16728	acetylcholine release enhancer	Neurotransmitter Enhancer
donepezil	acetylcholinesterase inhibitor	Neurotransmitter Inhibitor
demecarium	acetylcholinesterase inhibitor	Neurotransmitter Inhibitor
neostigmine	acetylcholinesterase inhibitor	Neurotransmitter Inhibitor
dimpylate	acetylcholinesterase inhibitor	Neurotransmitter Inhibitor
dichlorvos	acetylcholinesterase inhibitor	Neurotransmitter Inhibitor
phenserine	acetylcholinesterase inhibitor, beta amyloid synthesis inhibitor	Neurotransmitter Inhibitor
secnidazole	acetylcholinesterase inhibitor, microtubule inhibitor	Neurotransmitter Inhibitor
desoxypeganine	acetylcholinesterase inhibitor, monoamine oxidase inhibitor	Neurotransmitter Inhibitor
cladribine	adenosine deaminase inhibitor, ribonucleotide reductase inhibitor	Pro-Apoptosis
adenosine-triphosphate	adenosine receptor agonist	Neurotransmitter Inhibitor
adenosine	adenosine receptor agonist	Neurotransmitter Inhibitor
capadenoson	adenosine receptor agonist	Neurotransmitter Inhibitor
SDZ-WAG-994	adenosine receptor agonist	Neurotransmitter Inhibitor
acefylline	adenosine receptor agonist	Neurotransmitter Inhibitor
CV-1808	adenosine receptor agonist	Neurotransmitter Inhibitor
IB-MECA	adenosine receptor agonist	Neurotransmitter Inhibitor
5-Chloro-5-deoxy-ENBA-(+/-)	adenosine receptor agonist	Neurotransmitter Inhibitor
2-chloro-N6-cyclopentyladenosine	adenosine receptor agonist	Neurotransmitter Inhibitor
adenosine-phosphate	adenosine receptor agonist	Neurotransmitter Inhibitor
N6-cyclopentyladenosine	adenosine receptor agonist	Neurotransmitter Inhibitor
7-methylxanthine	adenosine receptor antagonist	Neurotransmitter Inhibitor
preladenant	adenosine receptor antagonist	Neurotransmitter Inhibitor
1,3-dipropyl-8-phenylxanthine	adenosine receptor antagonist	Neurotransmitter Inhibitor
SCH-58261	adenosine receptor antagonist	Neurotransmitter Inhibitor
MRS-1220	adenosine receptor antagonist	Neurotransmitter Inhibitor
istradefylline	adenosine receptor antagonist	Neurotransmitter Inhibitor
theophylline	adenosine receptor antagonist	Neurotransmitter Inhibitor
etofylline	adenosine receptor antagonist	Neurotransmitter Inhibitor
CGS-15943	adenosine receptor antagonist	Neurotransmitter Inhibitor
paraxanthine	adenosine receptor antagonist	Neurotransmitter Inhibitor
DPCPX	adenosine receptor antagonist	Neurotransmitter Inhibitor
sulmazole	adenosine receptor antagonist	Neurotransmitter Inhibitor
doxofylline	adenosine receptor antagonist	Neurotransmitter Inhibitor
ZM-241385	adenosine receptor antagonist	Neurotransmitter Inhibitor
mefloquine	adenosine receptor antagonist, hemoglobin antagonist	Neurotransmitter Inhibitor
dyphylline	adenosine receptor antagonist, phosphodiesterase inhibitor	Neurotransmitter Inhibitor
propentofylline	adenosine reuptake inhibitor, phosphodiesterase inhibitor	Neurotransmitter Inhibitor
3-deazaadenosine	adenosylhomocysteinase inhibitor	Histone/Methylation Inhibitor
SQ-22536	adenylyl cyclase inhibitor	Growth Hormone Inhibitor
atglistatin	adipose triglyceride lipase inhibitor	Lipid Metabolism Inhibitor
guanadrel	adrenergic inhibitor	Neurotransmitter Inhibitor
tulobuterol	adrenergic receptor agonist	Neurotransmitter Inhibitor
CGP-12177	adrenergic receptor agonist	Neurotransmitter Inhibitor
lofexidine	adrenergic receptor agonist	Neurotransmitter Inhibitor
guanaben-acetate	adrenergic receptor agonist	Neurotransmitter Inhibitor
guanfacine	adrenergic receptor agonist	Neurotransmitter Inhibitor
ephedrine	adrenergic receptor agonist	Neurotransmitter Inhibitor
methoxyphenamine	adrenergic receptor agonist	Neurotransmitter Inhibitor
methoxamine	adrenergic receptor agonist	Neurotransmitter Inhibitor
oxyfedrine	adrenergic receptor agonist	Neurotransmitter Inhibitor
A61603	adrenergic receptor agonist	Neurotransmitter Inhibitor
phenylephrine	adrenergic receptor agonist	Neurotransmitter Inhibitor
gabapentin-enacarbil	adrenergic receptor agonist	Neurotransmitter Inhibitor
isoxsuprine	adrenergic receptor agonist	Neurotransmitter Inhibitor
norepinephrine	adrenergic receptor agonist	Neurotransmitter Inhibitor
apraclonidine	adrenergic receptor agonist	Neurotransmitter Inhibitor
xamoterol	adrenergic receptor agonist	Neurotransmitter Inhibitor
mabuterol	adrenergic receptor agonist	Neurotransmitter Inhibitor
albuterol	adrenergic receptor agonist	Neurotransmitter Inhibitor
midodrine	adrenergic receptor agonist	Neurotransmitter Inhibitor
dobutamine	adrenergic receptor agonist	Neurotransmitter Inhibitor
ritodrine	adrenergic receptor agonist	Neurotransmitter Inhibitor
levalbuterol	adrenergic receptor agonist	Neurotransmitter Inhibitor
oxymetazoline	adrenergic receptor agonist	Neurotransmitter Inhibitor
xylazine	adrenergic receptor agonist	Neurotransmitter Inhibitor
CL316243	adrenergic receptor agonist	Neurotransmitter Inhibitor
terbutaline	adrenergic receptor agonist	Neurotransmitter Inhibitor
metaraminol	adrenergic receptor agonist	Neurotransmitter Inhibitor
buphenine	adrenergic receptor agonist	Neurotransmitter Inhibitor
armodafinil	adrenergic receptor agonist	Neurotransmitter Inhibitor
adrafinil	adrenergic receptor agonist	Neurotransmitter Inhibitor
clonidine	adrenergic receptor agonist	Neurotransmitter Inhibitor
clenbuterol	adrenergic receptor agonist	Neurotransmitter Inhibitor
etilefrine	adrenergic receptor agonist	Neurotransmitter Inhibitor
zilpaterol	adrenergic receptor agonist	Neurotransmitter Inhibitor
bambuterol	adrenergic receptor agonist	Neurotransmitter Inhibitor
broxaterol	adrenergic receptor agonist	Neurotransmitter Inhibitor
dipivefrine	adrenergic receptor agonist	Neurotransmitter Inhibitor
ZD-2079	adrenergic receptor agonist	Neurotransmitter Inhibitor
tizanidine	adrenergic receptor agonist	Neurotransmitter Inhibitor
xylometazoline	adrenergic receptor agonist	Neurotransmitter Inhibitor
deoxyepinephrine	adrenergic receptor agonist, dopamine receptor agonist	Neurotransmitter Inhibitor
talipexole	adrenergic receptor agonist, dopamine receptor agonist	Neurotransmitter Inhibitor
ergonovine	adrenergic receptor agonist, serotonin receptor agonist	Neurotransmitter Inhibitor
SR-59230A	adrenergic receptor antagonist	Neurotransmitter Inhibitor
reboxetine	adrenergic receptor antagonist	Neurotransmitter Inhibitor
doxazosin	adrenergic receptor antagonist	Neurotransmitter Inhibitor
RS-17053	adrenergic receptor antagonist	Neurotransmitter Inhibitor
carvedilol	adrenergic receptor antagonist	Neurotransmitter Inhibitor
urapidil	adrenergic receptor antagonist	Neurotransmitter Inhibitor
phentolamine	adrenergic receptor antagonist	Neurotransmitter Inhibitor
metoprolol	adrenergic receptor antagonist	Neurotransmitter Inhibitor
nicergoline	adrenergic receptor antagonist	Neurotransmitter Inhibitor
propranolol-(R)	adrenergic receptor antagonist	Neurotransmitter Inhibitor
nifenalol	adrenergic receptor antagonist	Neurotransmitter Inhibitor
bupranolol	adrenergic receptor antagonist	Neurotransmitter Inhibitor
tiprenolol	adrenergic receptor antagonist	Neurotransmitter Inhibitor
esmolol	adrenergic receptor antagonist	Neurotransmitter Inhibitor
setiptiline	adrenergic receptor antagonist	Neurotransmitter Inhibitor
prazosin	adrenergic receptor antagonist	Neurotransmitter Inhibitor
proxodolol	adrenergic receptor antagonist	Neurotransmitter Inhibitor
efaroxan	adrenergic receptor antagonist	Neurotransmitter Inhibitor
tolonidine	adrenergic receptor antagonist	Neurotransmitter Inhibitor
atipamezole	adrenergic receptor antagonist	Neurotransmitter Inhibitor
silodosin	adrenergic receptor antagonist	Neurotransmitter Inhibitor
RX-821002	adrenergic receptor antagonist	Neurotransmitter Inhibitor
landiolol	adrenergic receptor antagonist	Neurotransmitter Inhibitor
naftidrofuryl	adrenergic receptor antagonist	Neurotransmitter Inhibitor
xibenolol	adrenergic receptor antagonist	Neurotransmitter Inhibitor
propranolol	adrenergic receptor antagonist	Neurotransmitter Inhibitor
ICI-118,551	adrenergic receptor antagonist	Neurotransmitter Inhibitor
WB-4101	adrenergic receptor antagonist	Neurotransmitter Inhibitor
levobunolol	adrenergic receptor antagonist	Neurotransmitter Inhibitor
oxprenolol	adrenergic receptor antagonist	Neurotransmitter Inhibitor
betaxolol	adrenergic receptor antagonist	Neurotransmitter Inhibitor
BD-1047	adrenergic receptor antagonist	Neurotransmitter Inhibitor
vinburnine	adrenergic receptor antagonist	Neurotransmitter Inhibitor
moprolol	adrenergic receptor antagonist	Neurotransmitter Inhibitor
ICI-89406	adrenergic receptor antagonist	Neurotransmitter Inhibitor
vincamine	adrenergic receptor antagonist	Neurotransmitter Inhibitor
alfuzosin	adrenergic receptor antagonist	Neurotransmitter Inhibitor
tolazoline	adrenergic receptor antagonist	Neurotransmitter Inhibitor
metazosin	adrenergic receptor antagonist	Neurotransmitter Inhibitor
bunazosin	adrenergic receptor antagonist	Neurotransmitter Inhibitor
atenolol-(+/-)	adrenergic receptor antagonist	Neurotransmitter Inhibitor
dronedarone	adrenergic receptor antagonist	Neurotransmitter Inhibitor
pindolol	adrenergic receptor antagonist	Neurotransmitter Inhibitor
practolol	adrenergic receptor antagonist	Neurotransmitter Inhibitor
dapiprazole	adrenergic receptor antagonist	Neurotransmitter Inhibitor
talinolol	adrenergic receptor antagonist	Neurotransmitter Inhibitor
arotinolol	adrenergic receptor antagonist	Neurotransmitter Inhibitor
celiprolol	adrenergic receptor antagonist	Neurotransmitter Inhibitor
tamsulosin	adrenergic receptor antagonist	Neurotransmitter Inhibitor
moxisylyte	adrenergic receptor antagonist	Neurotransmitter Inhibitor
naftopidil	adrenergic receptor antagonist	Neurotransmitter Inhibitor
cloranolol	adrenergic receptor antagonist	Neurotransmitter Inhibitor
penbutolol	adrenergic receptor antagonist	Neurotransmitter Inhibitor
acebutolol	adrenergic receptor antagonist	Neurotransmitter Inhibitor
bisoprolol	adrenergic receptor antagonist	Neurotransmitter Inhibitor
niguldipine-(S)-(+)	adrenergic receptor antagonist	Neurotransmitter Inhibitor
ifenprodil	adrenergic receptor antagonist, glutamate receptor antagonist	Neurotransmitter Inhibitor
3-MPPI	adrenergic receptor ligand	Neurotransmitter Inhibitor
A-674563	AKT inhibitor	Pro-Apoptosis
GDC-0068	AKT inhibitor	Pro-Apoptosis
AZD5363	AKT inhibitor	Pro-Apoptosis
10-DEBC	AKT inhibitor	Pro-Apoptosis
perifosine	AKT inhibitor	Pro-Apoptosis
AT7867	AKT inhibitor	Pro-Apoptosis
triciribine	AKT inhibitor	Pro-Apoptosis
MK-2206	AKT inhibitor	Pro-Apoptosis
uprosertib	AKT inhibitor	Pro-Apoptosis
CCT128930	AKT inhibitor	Pro-Apoptosis
GSK2110183	AKT inhibitor	Pro-Apoptosis
honokiol	AKT inhibitor	Pro-Apoptosis
ONC201	AKT inhibitor, MAP kinase inhibitor	Pro-Apoptosis
palomid-529	AKT inhibitor, mTOR inhibitor	Pro-Apoptosis
PHT-427	AKT inhibitor, pyruvate dehydrogenase inhibitor	Pro-Apoptosis
isovaleramide	alcohol dehydrogenase inhibitor	Alcohol Metabolism Inhibitor
AD-5467	aldose reductase inhibitor	Sugar Metabolism Inhibitor
fidarestat	aldose reductase inhibitor	Sugar Metabolism Inhibitor
SB-505124	ALK tyrosine kinase receptor inhibitor	Pro-Apoptosis
crizotinib	ALK tyrosine kinase receptor inhibitor	Pro-Apoptosis
GW-788388	ALK tyrosine kinase receptor inhibitor	Pro-Apoptosis
ML347	ALK tyrosine kinase receptor inhibitor	Pro-Apoptosis
NVP-TAE684	ALK tyrosine kinase receptor inhibitor	Pro-Apoptosis
ceritinib	ALK tyrosine kinase receptor inhibitor	Pro-Apoptosis
DMH1	ALK tyrosine kinase receptor inhibitor	Pro-Apoptosis
AZD3463	ALK tyrosine kinase receptor inhibitor, insulin growth factor receptor inhibitor	Pro-Apoptosis
AZD3463	ALK tyrosine kinase receptor inhibitor, insulin growth factor receptor inhibitor	Pro-Apoptosis
swainsonine	alpha mannosidase inhibitor	Sugar Metabolism Inhibitor
1-deoxymannojirimycin	alpha mannosidase inhibitor	Sugar Metabolism Inhibitor
ETC-1002	AMPK inhibitor	Energy Metabolism Inhibitor
bucetin	analgesic agent	Inflammatory/Immune
SCP-1	analgesic agent	Inflammatory/Immune
nifenazone	analgesic agent	Inflammatory/Immune
metacetamol	analgesic agent	Inflammatory/Immune
abiraterone	androgen biosynthesis inhibitor	Growth Hormone Inhibitor
testosterone-undecanoate	androgen receptor agonist	Growth Hormone Inhibitor
stanozolol	androgen receptor agonist	Growth Hormone Inhibitor
testosterone-enanthate	androgen receptor agonist	Growth Hormone Inhibitor
dehydroepiandrosterone-sulfate	androgen receptor agonist, estrogen receptor agonist	Growth Hormone Inhibitor
tibolone	androgen receptor agonist, estrogen receptor agonist, progesterone receptor agonist	Growth Hormone Inhibitor
nilutamide	androgen receptor antagonist	Growth Hormone Inhibitor
bicalutamide	androgen receptor antagonist	Growth Hormone Inhibitor
CB-03-01	androgen receptor antagonist	Growth Hormone Inhibitor
eugenol	androgen receptor antagonist	Growth Hormone Inhibitor
cyproterone-acetate	androgen receptor antagonist	Growth Hormone Inhibitor
flutamide	androgen receptor antagonist	Growth Hormone Inhibitor
ASC-J9	androgen receptor enhancer	Growth Hormone Activator
AZD3514	androgen receptor modulator	Neurotransmitter Enhancer
MK-0773	androgen receptor modulator	Neurotransmitter Enhancer
LY2452473	androgen receptor modulator	Neurotransmitter Enhancer
dromostanolone-propionate	androgen receptor modulator	Neurotransmitter Enhancer
fluoxymesterone	androgen receptor modulator	Neurotransmitter Enhancer
andarine	androgen receptor modulator	Neurotransmitter Enhancer
mitoflaxone	angiogenesis inhibitor	Angiogenesis Inhibitor
tiabendazole	angiogenesis inhibitor	Angiogenesis Inhibitor
anecortave-acetate	angiogenesis inhibitor	Angiogenesis Inhibitor
tranilast	angiogenesis inhibitor	Angiogenesis Inhibitor
roquinimex	angiogenesis inhibitor, tumor necrosis factor production inhibitor	Angiogenesis Inhibitor
pomalidomide	angiogenesis inhibitor, tumor necrosis factor production inhibitor	Angiogenesis Inhibitor
PD-123319	angiotensin antagonist	Angiogenesis Inhibitor
zofenopril-calcium	angiotensin converting enzyme inhibitor	Angiogenesis Inhibitor
perindopril	angiotensin converting enzyme inhibitor	Angiogenesis Inhibitor
captopril	angiotensin converting enzyme inhibitor	Angiogenesis Inhibitor
enalapril	angiotensin converting enzyme inhibitor	Angiogenesis Inhibitor
benazepril	angiotensin converting enzyme inhibitor	Angiogenesis Inhibitor
temocapril	angiotensin converting enzyme inhibitor	Angiogenesis Inhibitor
alacepril	angiotensin converting enzyme inhibitor	Angiogenesis Inhibitor
methiopril	angiotensin converting enzyme inhibitor	Angiogenesis Inhibitor
fosinopril	angiotensin converting enzyme inhibitor	Angiogenesis Inhibitor
deserpidine	angiotensin converting enzyme inhibitor	Angiogenesis Inhibitor
lisinopril	angiotensin converting enzyme inhibitor	Angiogenesis Inhibitor
cilazapril	angiotensin converting enzyme inhibitor	Angiogenesis Inhibitor
ramipril	angiotensin converting enzyme inhibitor	Angiogenesis Inhibitor
TXA127	angiotensin receptor agonist	Angiogenesis Inhibitor
candesartan-cilextil	angiotensin receptor antagonist	Angiogenesis Inhibitor
EMD-66684	angiotensin receptor antagonist	Angiogenesis Inhibitor
telmisartan	angiotensin receptor antagonist	Angiogenesis Inhibitor
candesartan	angiotensin receptor antagonist	Angiogenesis Inhibitor
azilsartan	angiotensin receptor antagonist	Angiogenesis Inhibitor
olmesartan-medoxomil	angiotensin receptor antagonist	Angiogenesis Inhibitor
eprosartan	angiotensin receptor antagonist	Angiogenesis Inhibitor
azilsartan-medoxomil	angiotensin receptor antagonist	Angiogenesis Inhibitor
sodium-gualenate	antacid	Other
oxfendazole	anthelmintic agent	Neurotransmitter Inhibitor
methiazole	anthelmintic agent	Neurotransmitter Inhibitor
bephenium-hydroxynaphthoate	anthelmintic agent	Neurotransmitter Inhibitor
praziquantel	anthelmintic agent	Neurotransmitter Inhibitor
lobendazole	anthelmintic agent	Neurotransmitter Inhibitor
albendazole-oxide	anthelmintic agent	Neurotransmitter Inhibitor
salicin	anti-inflammatory agent	Inflammatory/Immune
etosalamide	anti-inflammatory agent	Inflammatory/Immune
morniflumate	anti-inflammatory agent	Inflammatory/Immune
prednisolone-tebutate	anti-inflammatory agent	Inflammatory/Immune
paeonol	anti-inflammatory agent	Inflammatory/Immune
betamethasone-dipropionate	anti-inflammatory agent	Inflammatory/Immune
diroximel-fumarate	anti-inflammatory agent	Inflammatory/Immune
methylprednisolone-aceponate	anti-inflammatory agent, glucocorticoid receptor agonist	Inflammatory/Immune
pentamidine	anti-pneumocystis agent	Other
propafenone	antiarrhythmic	Ion Channel Regulation
hydroquinidine	antiarrhythmic	Ion Channel Regulation
N-methyllidocaine-iodide	antiarrhythmic medication	Ion Channel Regulation
sulforaphane	anticancer agent, aryl hydrocarbon receptor antagonist	DNA Replication Inhibitor
dichlorophen	anticestodal agent	Ion Channel Regulation
linalool	anticonvulsant	Neurotransmitter Inhibitor
beclamide	anticonvulsant	Neurotransmitter Inhibitor
ethacizin	anticonvulsant	Neurotransmitter Inhibitor
pimethixene	antihistamine	Inflammatory/Immune
pimethixene	antihistamine	Inflammatory/Immune
mebhydrolin	antihistamine	Inflammatory/Immune
mebhydrolin	antihistamine	Inflammatory/Immune
antazoline	antihistamine	Inflammatory/Immune
antazoline	antihistamine	Inflammatory/Immune
homochlorcyclizine	antihistamine	Inflammatory/Immune
homochlorcyclizine	antihistamine	Inflammatory/Immune
benzoxiquine	antiinfective drug	Other
astragaloside-a	antiinflammatory agent	Inflammatory/Immune
emorfazone	antiinflammatory agent, cyclooxygenase inhibitor	Inflammatory/Immune
piperaquine-phosphate	antimalarial agent	Protein Synthesis Inhibitor
pyronaridine	antimalarial agent	Protein Synthesis Inhibitor
halofantrine	antimalarial agent	Protein Synthesis Inhibitor
chloroquine	antimalarial agent	Protein Synthesis Inhibitor
dihydroartemisinin	antimalarial agent	Protein Synthesis Inhibitor
naphthoquine-phosphate	antimalarial agent	Protein Synthesis Inhibitor
tafenoquine	antimalarial agent	Protein Synthesis Inhibitor
butylated-hydroxyanisole	antioxidant	Oxidative Stress Inhibitors
secoisolariciresinol-diglucoside	antioxidant	Oxidative Stress Inhibitors
trolox	antioxidant	Oxidative Stress Inhibitors
alpha-tochopheryl-acetate	antioxidant	Oxidative Stress Inhibitors
timonacic	antioxidant	Oxidative Stress Inhibitors
esculin	antioxidant	Oxidative Stress Inhibitors
mesna	antioxidant	Oxidative Stress Inhibitors
troxerutin	antioxidant	Oxidative Stress Inhibitors
rutin	antioxidant, capillary stabilizing agent, nitric oxide scavenger	Inflammatory/Immune
roxarsone	antiprotozoal agent	DNA Replication Inhibitor
ornidazole	antiprotozoal agent	DNA Replication Inhibitor
toltrazuril	antiprotozoal agent	DNA Replication Inhibitor
decoquinate	antiprotozoal agent	DNA Replication Inhibitor
ethopabate	antiprotozoal agent	DNA Replication Inhibitor
merbromin	antiseptic	Other
merbromin	antiseptic	Other
iodoquinol	antiseptic	Other
iodoquinol	antiseptic	Other
alibendol	antispasmodic	Neurotransmitter Inhibitor
chromocarb	antispasmodic	Neurotransmitter Inhibitor
levodropropizine	antitussive	Inflammatory/Immune
vidarabine	antiviral	DNA Replication Inhibitor
ribavirin	antiviral	DNA Replication Inhibitor
mebicar	anxiolytic	Neurotransmitter Inhibitor
apabetalone	apolipoprotein expression enhancer	Lipid Metabolism Activator
oncrasin-1	apoptosis stimulant	Pro-Apoptosis
dioscin	apoptosis stimulant	Pro-Apoptosis
tasisulam	apoptosis stimulant	Pro-Apoptosis
betulinic-acid	apoptosis stimulant, NFkB pathway inhibitor	Pro-Apoptosis
imexon	apoptosis stimulant, ribonucleotide reductase inhibitor	Pro-Apoptosis
golgicide-a	ARF inhibitor	Pro-Apoptosis
EXO-1	ARF inhibitor	Pro-Apoptosis
testolactone	aromatase inhibitor	Growth Hormone Inhibitor
letrozole	aromatase inhibitor	Growth Hormone Inhibitor
exemestane	aromatase inhibitor	Growth Hormone Inhibitor
formestane	aromatase inhibitor	Growth Hormone Inhibitor
fadrozole	aromatase inhibitor	Growth Hormone Inhibitor
anastrozole	aromatase inhibitor	Growth Hormone Inhibitor
naringenin	aromatase inhibitor, TRPV antagonist	Growth Hormone Inhibitor
indole-3-carbinol	aryl hydrocarbon receptor agonist, indoleamine 2,3-dioxygenase inhibitor	G-Coupled Receptor Regulator
indole-3-carbinol	aryl hydrocarbon receptor agonist, indoleamine 2,3-dioxygenase inhibitor	Inflammatory/Immune
CH223191	aryl hydrocarbon receptor antagonist	G-Coupled Receptor Regulator
pepstatin	aspartic protease inhibitor	Protein Metabolism Inhibitor
probucol	atherogenesis inhibitor	Lipid Metabolism Inhibitor
KU-60019	ATM kinase inhibitor	Pro-Apoptosis
chlorpropamide	ATP channel blocker	Energy Metabolism Inhibitor
tolbutamide	ATP channel blocker	Energy Metabolism Inhibitor
tolazamide	ATP channel blocker	Energy Metabolism Inhibitor
gliclazide	ATP channel blocker, insulin secretagogue	Energy Metabolism Inhibitor
pyrithione-zinc	ATP synthase inhibitor	Energy Metabolism Inhibitor
oligomycin-a	ATP synthase inhibitor, ATPase inhibitor	Energy Metabolism Inhibitor
PNU-37883	ATP-sensitive potassium channel antagonist	Energy Metabolism Inhibitor
M-14157	ATP-sensitive potassium channel antagonist	Energy Metabolism Inhibitor
blebbistatin-(-)	ATPase inhibitor	Energy Metabolism Inhibitor
digitoxin	ATPase inhibitor	Energy Metabolism Inhibitor
lansoprazole	ATPase inhibitor	Energy Metabolism Inhibitor
esomeprazole	ATPase inhibitor	Energy Metabolism Inhibitor
digoxin	ATPase inhibitor	Energy Metabolism Inhibitor
cyclopiazonic-acid	ATPase inhibitor	Energy Metabolism Inhibitor
omeprazole-sulfide	ATPase inhibitor	Energy Metabolism Inhibitor
NMS-873	ATPase inhibitor	Energy Metabolism Inhibitor
ouabain	ATPase inhibitor	Energy Metabolism Inhibitor
tenatoprazole	ATPase inhibitor	Energy Metabolism Inhibitor
bedaquiline	ATPase inhibitor	Energy Metabolism Inhibitor
dexlansoprazole	ATPase inhibitor	Energy Metabolism Inhibitor
thonzonium	ATPase inhibitor	Energy Metabolism Inhibitor
blebbistatin-(+/-)	ATPase inhibitor	Energy Metabolism Inhibitor
DBeQ	ATPase inhibitor	Energy Metabolism Inhibitor
pantoprazole	ATPase inhibitor	Energy Metabolism Inhibitor
digitoxigenin	ATPase inhibitor	Energy Metabolism Inhibitor
omeprazole	ATPase inhibitor	Energy Metabolism Inhibitor
rabeprazole	ATPase inhibitor, gastrin inhibitor	Energy Metabolism Inhibitor
evodiamine	ATPase inhibitor, TRPV agonist	Energy Metabolism Inhibitor
ETP-46464	ATR kinase inhibitor	DNA Replication Inhibitor
VE-821	ATR kinase inhibitor	DNA Replication Inhibitor
VE-822	ATR kinase inhibitor	DNA Replication Inhibitor
AZ20	ATR kinase inhibitor	DNA Replication Inhibitor
AMG900	Aurora kinase inhibitor	Pro-Apoptosis
MK-8745	Aurora kinase inhibitor	Pro-Apoptosis
MLN-8054	Aurora kinase inhibitor	Pro-Apoptosis
ZM-447439	Aurora kinase inhibitor	Pro-Apoptosis
MK-5108	Aurora kinase inhibitor	Pro-Apoptosis
CYC116	Aurora kinase inhibitor	Pro-Apoptosis
hesperadin	Aurora kinase inhibitor	Pro-Apoptosis
aurora-a-inhibitor-i	Aurora kinase inhibitor	Pro-Apoptosis
CCT137690	Aurora kinase inhibitor	Pro-Apoptosis
barasertib-HQPA	Aurora kinase inhibitor	Pro-Apoptosis
PHA-680632	Aurora kinase inhibitor	Pro-Apoptosis
danusertib	Aurora kinase inhibitor, growth factor receptor inhibitor	Growth Factor Inhibitors
AT-9283	Aurora kinase inhibitor, JAK inhibitor	Pro-Apoptosis
bithionol	autotaxin inhibitor	Energy Metabolism Inhibitor
minocycline	bacterial 30S ribosomal subunit inhibitor	Protein Synthesis Inhibitor
bekanamycin	bacterial 30S ribosomal subunit inhibitor	Protein Synthesis Inhibitor
radezolid	bacterial 30S ribosomal subunit inhibitor, bacterial 50S ribosomal subunit inhibitor	Protein Synthesis Inhibitor
josamycin	bacterial 50S ribosomal subunit inhibitor	Protein Synthesis Inhibitor
roxithromycin	bacterial 50S ribosomal subunit inhibitor	Protein Synthesis Inhibitor
clarithromycin	bacterial 50S ribosomal subunit inhibitor	Protein Synthesis Inhibitor
valnemulin	bacterial 50S ribosomal subunit inhibitor	Protein Synthesis Inhibitor
thiamphenicol	bacterial 50S ribosomal subunit inhibitor	Protein Synthesis Inhibitor
clindamycin-palmitate	bacterial 50S ribosomal subunit inhibitor	Protein Synthesis Inhibitor
tedizolid	bacterial 50S ribosomal subunit inhibitor	Protein Synthesis Inhibitor
tilmicosin	bacterial 50S ribosomal subunit inhibitor	Protein Synthesis Inhibitor
linezolid	bacterial 50S ribosomal subunit inhibitor	Protein Synthesis Inhibitor
dirithromycin	bacterial 50S ribosomal subunit inhibitor	Protein Synthesis Inhibitor
chloramphenicol	bacterial 50S ribosomal subunit inhibitor	Protein Synthesis Inhibitor
azalomycin-b	bacterial 50S ribosomal subunit inhibitor	Protein Synthesis Inhibitor
sulfamethizole	bacterial antifolate	DNA Replication Inhibitor
sulfaguanidine	bacterial antifolate	DNA Replication Inhibitor
sulfadiazine	bacterial antifolate	DNA Replication Inhibitor
sulfamethoxypyridazine	bacterial antifolate	DNA Replication Inhibitor
dapsone	bacterial antifolate	DNA Replication Inhibitor
sulfabenzamide	bacterial antifolate	DNA Replication Inhibitor
sulfafurazole	bacterial antifolate	DNA Replication Inhibitor
sulfachlorpyridazine	bacterial antifolate	DNA Replication Inhibitor
sulfamerazine	bacterial antifolate	DNA Replication Inhibitor
cefoselis	bacterial cell wall synthesis inhibitor	Cytoskeleton Organization Inhibitor
cefditoren-pivoxil	bacterial cell wall synthesis inhibitor	Cytoskeleton Organization Inhibitor
miconazole	bacterial cell wall synthesis inhibitor	Cytoskeleton Organization Inhibitor
nafcillin	bacterial cell wall synthesis inhibitor	Cytoskeleton Organization Inhibitor
cefetamet	bacterial cell wall synthesis inhibitor	Cytoskeleton Organization Inhibitor
SQ-109	bacterial cell wall synthesis inhibitor	Cytoskeleton Organization Inhibitor
oxacillin	bacterial cell wall synthesis inhibitor	Cytoskeleton Organization Inhibitor
cefepime	bacterial cell wall synthesis inhibitor	Cytoskeleton Organization Inhibitor
cefonicid	bacterial cell wall synthesis inhibitor	Cytoskeleton Organization Inhibitor
vancomycin	bacterial cell wall synthesis inhibitor	Cytoskeleton Organization Inhibitor
ethambutol	bacterial cell wall synthesis inhibitor	Cytoskeleton Organization Inhibitor
ceftriaxone	bacterial cell wall synthesis inhibitor	Cytoskeleton Organization Inhibitor
cephalosporin-c-zn	bacterial cell wall synthesis inhibitor	Cytoskeleton Organization Inhibitor
dicloxacillin	bacterial cell wall synthesis inhibitor	Cytoskeleton Organization Inhibitor
cefadroxil	bacterial cell wall synthesis inhibitor	Cytoskeleton Organization Inhibitor
cefetamet-pivoxil	bacterial cell wall synthesis inhibitor	Cytoskeleton Organization Inhibitor
ceftibuten	bacterial cell wall synthesis inhibitor	Cytoskeleton Organization Inhibitor
penicillin-v-potassium	bacterial cell wall synthesis inhibitor	Cytoskeleton Organization Inhibitor
methicillin	bacterial cell wall synthesis inhibitor	Cytoskeleton Organization Inhibitor
cefaclor	bacterial cell wall synthesis inhibitor	Cytoskeleton Organization Inhibitor
bacampicillin	bacterial cell wall synthesis inhibitor	Cytoskeleton Organization Inhibitor
aztreonam	bacterial cell wall synthesis inhibitor	Cytoskeleton Organization Inhibitor
cefminox	bacterial cell wall synthesis inhibitor	Cytoskeleton Organization Inhibitor
oxiconazole	bacterial cell wall synthesis inhibitor	Cytoskeleton Organization Inhibitor
carumonam	bacterial cell wall synthesis inhibitor	Cytoskeleton Organization Inhibitor
oritavancin	bacterial cell wall synthesis inhibitor	Cytoskeleton Organization Inhibitor
ceftiofur	bacterial cell wall synthesis inhibitor	Cytoskeleton Organization Inhibitor
cefotetan	bacterial cell wall synthesis inhibitor	Cytoskeleton Organization Inhibitor
sparfloxacin	bacterial DNA gyrase inhibitor	DNA Replication Inhibitor
difloxacin	bacterial DNA gyrase inhibitor	DNA Replication Inhibitor
trovafloxacin	bacterial DNA gyrase inhibitor	DNA Replication Inhibitor
ciprofloxacin	bacterial DNA gyrase inhibitor	DNA Replication Inhibitor
piromidic-acid	bacterial DNA gyrase inhibitor	DNA Replication Inhibitor
sitafloxacin	bacterial DNA gyrase inhibitor	DNA Replication Inhibitor
enrofloxacin	bacterial DNA gyrase inhibitor	DNA Replication Inhibitor
novobiocin	bacterial DNA gyrase inhibitor	DNA Replication Inhibitor
danofloxacin	bacterial DNA gyrase inhibitor	DNA Replication Inhibitor
lomefloxacin	bacterial DNA gyrase inhibitor	DNA Replication Inhibitor
gemifloxacin	bacterial DNA gyrase inhibitor	DNA Replication Inhibitor
rufloxacin	bacterial DNA gyrase inhibitor	DNA Replication Inhibitor
finafloxacin	bacterial DNA gyrase inhibitor	DNA Replication Inhibitor
sarafloxacin	bacterial DNA gyrase inhibitor	DNA Replication Inhibitor
prulifloxacin	bacterial DNA gyrase inhibitor	DNA Replication Inhibitor
nadifloxacin	bacterial DNA gyrase inhibitor	DNA Replication Inhibitor
balofloxacin	bacterial DNA gyrase inhibitor	DNA Replication Inhibitor
tosufloxacin	bacterial DNA gyrase inhibitor	DNA Replication Inhibitor
epicatechin-gallate-(-)	bacterial DNA gyrase inhibitor	DNA Replication Inhibitor
nithiamide	bacterial DNA inhibitor	DNA Replication Inhibitor
dimetridazole	bacterial DNA inhibitor	DNA Replication Inhibitor
nifuroxazide	bacterial DNA inhibitor	DNA Replication Inhibitor
furazolidone	bacterial DNA inhibitor	DNA Replication Inhibitor
colistin-b-sulfate	bacterial permeability inducer	Ion Channel Regulation
pentobarbital	barbiturate antiepileptic, GABA receptor modulator	Neurotransmitter Enhancer
pentobarbital	barbiturate antiepileptic, GABA receptor modulator	Neurotransmitter Inhibitor
pentobarbital	barbiturate antiepileptic, GABA receptor modulator	Neurotransmitter Inhibitor
oridonin	BCL inhibitor	Pro-Apoptosis
obatoclax	BCL inhibitor	Pro-Apoptosis
TW-37	BCL inhibitor	Pro-Apoptosis
HA14-1	BCL inhibitor	Pro-Apoptosis
gossypol	BCL inhibitor, MCL1 inhibitor	Pro-Apoptosis
2,3-DCPE	Bcl-XL downregulator	Pro-Apoptosis
GNF-2	Bcr-Abl kinase inhibitor	Pro-Apoptosis
metatinib	Bcr-Abl kinase inhibitor	Pro-Apoptosis
flumatinib	Bcr-Abl kinase inhibitor	Pro-Apoptosis
ponatinib	Bcr-Abl kinase inhibitor, FLT3 inhibitor, PDGFR tyrosine kinase receptor inhibitor	Pro-Apoptosis
bafetinib	Bcr-Abl kinase inhibitor, LYN tyrosine kinase inhibitor	Pro-Apoptosis
ZK-93423	benzodiazepine receptor agonist	Neurotransmitter Inhibitor
temazepam	benzodiazepine receptor agonist	Neurotransmitter Inhibitor
GABA-linoleamide	benzodiazepine receptor agonist	Neurotransmitter Inhibitor
eprinomectin	benzodiazepine receptor agonist	Neurotransmitter Inhibitor
piperazine	benzodiazepine receptor agonist	Neurotransmitter Inhibitor
fenigam	benzodiazepine receptor agonist	Neurotransmitter Inhibitor
ivermectin	benzodiazepine receptor agonist	Neurotransmitter Inhibitor
sodium-oxybate	benzodiazepine receptor agonist	Neurotransmitter Inhibitor
zaleplon	benzodiazepine receptor agonist	Neurotransmitter Inhibitor
indiplon	benzodiazepine receptor agonist	Neurotransmitter Inhibitor
diazepam	benzodiazepine receptor agonist	Neurotransmitter Inhibitor
bentazepam	benzodiazepine receptor agonist	Neurotransmitter Inhibitor
eszopiclone	benzodiazepine receptor agonist	Neurotransmitter Inhibitor
loreclezole	benzodiazepine receptor agonist	Neurotransmitter Inhibitor
FGIN-1-43	benzodiazepine receptor agonist	Neurotransmitter Inhibitor
lorazepam	benzodiazepine receptor agonist	Neurotransmitter Inhibitor
zolpidem	benzodiazepine receptor agonist	Neurotransmitter Inhibitor
ZK-93426	benzodiazepine receptor antagonist	Neurotransmitter Inhibitor
PK-11195	benzodiazepine receptor antagonist	Neurotransmitter Inhibitor
beta-CCB	benzodiazepine receptor ligand	Neurotransmitter Inhibitor
salidroside	beta amyloid protein neurotoxicity inhibitor	Neurotransmitter Inhibitor
tramiprosate	beta amyloid protein neurotoxicity inhibitor	Neurotransmitter Inhibitor
glycerol-monolaurate	beta lactamase inhibitor	Cytoskeleton Organization Inhibitor
avibactam	beta lactamase inhibitor	Cytoskeleton Organization Inhibitor
7-aminocephalosporanic-acid	beta lactamase inhibitor	Cytoskeleton Organization Inhibitor
relebactam	beta lactamase inhibitor	Cytoskeleton Organization Inhibitor
ICG-001	beta-catenin inhibitor	Pro-Apoptosis
LY2811376	beta-secretase inhibitor	Protein Metabolism Inhibitor
LY2886721	beta-secretase inhibitor	Protein Metabolism Inhibitor
PTC-209	BMI-1 inhibitor	Pro-Apoptosis
LDN-212854	bone morphogenic protein inhibitor	Growth Factor Inhibitors
K02288	bone morphogenic protein inhibitor	Growth Factor Inhibitors
pamidronate	bone resorption inhibitor	Other
medronic-acid	bone resorption inhibitor	Other
alendronate	bone resorption inhibitor	Other
neridronic-acid	bone resorption inhibitor	Other
WIN-64338	bradykinin receptor antagonist	Angiogenesis Inhibitor
icatibant-acetate	bradykinin receptor antagonist	Angiogenesis Inhibitor
noscapine	bradykinin receptor antagonist, tubulin polymerization inhibitor	Cytoskeleton Organization Inhibitor
chrysin	breast cancer resistance protein inhibitor	Pro-Apoptosis
I-BET151	bromodomain inhibitor	Transcription Inhibitor
JQ1-(+)	bromodomain inhibitor	Transcription Inhibitor
OTX015	bromodomain inhibitor	Transcription Inhibitor
SGC-CBP30	bromodomain inhibitor	Transcription Inhibitor
I-BET-762	bromodomain inhibitor	Transcription Inhibitor
PFI-1	bromodomain inhibitor	Transcription Inhibitor
bromosporine	bromodomain inhibitor	Transcription Inhibitor
10058-F4	c-Myc inhibitor	Pro-Apoptosis
cyclosporin-a	calcineurin inhibitor	Inflammatory/Immune
cyclosporine	calcineurin inhibitor	Inflammatory/Immune
BIBN4096	calcitonin antagonist	Growth Hormone Inhibitor
MK-3207	calcitonin antagonist	Growth Hormone Inhibitor
BMS-927711	calcitonin antagonist	Growth Hormone Inhibitor
cinacalcet	calcium channel activator	Ion Channel Regulation
FPL-64176	calcium channel activator	Ion Channel Regulation
nitrendipine	calcium channel blocker	Ion Channel Regulation
cinnarazine	calcium channel blocker	Ion Channel Regulation
manidipine	calcium channel blocker	Ion Channel Regulation
MRS1845	calcium channel blocker	Ion Channel Regulation
flunarizine	calcium channel blocker	Ion Channel Regulation
felodipine	calcium channel blocker	Ion Channel Regulation
cyclandelate	calcium channel blocker	Ion Channel Regulation
prenylamine	calcium channel blocker	Ion Channel Regulation
lercanidipine	calcium channel blocker	Ion Channel Regulation
gabapentin	calcium channel blocker	Ion Channel Regulation
lacidipine	calcium channel blocker	Ion Channel Regulation
lidoflazine	calcium channel blocker	Ion Channel Regulation
SR-33805	calcium channel blocker	Ion Channel Regulation
carboxyamidotriazole	calcium channel blocker	Ion Channel Regulation
diltiazem	calcium channel blocker	Ion Channel Regulation
cleviprex	calcium channel blocker	Ion Channel Regulation
SKF-96365	calcium channel blocker	Ion Channel Regulation
lomerizine	calcium channel blocker	Ion Channel Regulation
idebenone	calcium channel modulator	Ion Channel Regulation
cyclovirobuxin-d	calcium channel modulator	Ion Channel Regulation
NPS-2143	calcium receptor antagonist	Ion Channel Regulation
levosimendan	calcium sensitizer	Ion Channel Regulation
pimobendan	calcium sensitizer, phosphodiesterase inhibitor	Ion Channel Regulation
dexniguldipine	calmodulin antagonist	Ion Channel Regulation
A-7	calmodulin antagonist	Ion Channel Regulation
zaldaride	calmodulin antagonist	Ion Channel Regulation
GP2a	cannabinoid receptor agonist	Neurotransmitter Inhibitor
GP1a	cannabinoid receptor agonist	Neurotransmitter Inhibitor
GW-405833	cannabinoid receptor agonist	Neurotransmitter Inhibitor
AM-1241	cannabinoid receptor agonist	Neurotransmitter Inhibitor
GW-842166	cannabinoid receptor agonist	Neurotransmitter Inhibitor
oleoylethanolamide	cannabinoid receptor agonist, glucose dependent insulinotropic receptor agonist, potassium channel blocker, PPAR receptor agonist	Neurotransmitter Inhibitor
CP-945,598	cannabinoid receptor antagonist	Neurotransmitter Inhibitor
O-1918	cannabinoid receptor antagonist	Neurotransmitter Inhibitor
AM-281	cannabinoid receptor antagonist	Neurotransmitter Inhibitor
LY320135	cannabinoid receptor antagonist	Neurotransmitter Inhibitor
AM-251	cannabinoid receptor antagonist	Neurotransmitter Inhibitor
AM-630	cannabinoid receptor antagonist	Neurotransmitter Inhibitor
BML-190	cannabinoid receptor inverse agonist	Neurotransmitter Inhibitor
taranabant	cannabinoid receptor inverse agonist	Neurotransmitter Inhibitor
org-27569	cannabinoid receptor modulator	Neurotransmitter Inhibitor
carglumic-acid	carbamoyl phosphate synthase activator	Nitrogen Metabolism Inhibitor
diclofenamide	carbonic anhydrase inhibitor	Energy Metabolism Inhibitor
dorzolamide	carbonic anhydrase inhibitor	Energy Metabolism Inhibitor
metolazone	carbonic anhydrase inhibitor	Energy Metabolism Inhibitor
tioxolone	carbonic anhydrase inhibitor	Energy Metabolism Inhibitor
mafenide	carbonic anhydrase inhibitor	Energy Metabolism Inhibitor
U-104	carbonic anhydrase inhibitor	Energy Metabolism Inhibitor
xipamide	carbonic anhydrase inhibitor	Energy Metabolism Inhibitor
2-aminobenzenesulfonamide	carbonic anhydrase inhibitor	Energy Metabolism Inhibitor
ethoxzolamide	carbonic anhydrase inhibitor	Energy Metabolism Inhibitor
butylated-hydroxytoluene	carbonic anhydrase inhibitor	Energy Metabolism Inhibitor
benzthiazide	carbonic anhydrase inhibitor	Energy Metabolism Inhibitor
lanatoside-c	cardiac glycoside	Ion Channel Regulation
peruvoside	cardiac glycoside	Ion Channel Regulation
omecamtiv-mecarbil	cardiac myosin activator	Energy Metabolism Inhibitor
perhexiline	carnitine palmitoyltransferase inhibitor	Pro-Apoptosis
etomoxir	carnitine palmitoyltransferase inhibitor	Pro-Apoptosis
CX-4945	casein kinase inhibitor	Pro-Apoptosis
4,5,6,7-tetrabromobenzotriazole	casein kinase inhibitor	Pro-Apoptosis
apigenin	casein kinase inhibitor, cell proliferation inhibitor	Pro-Apoptosis
LY303511	casein kinase inhibitor, mTOR inhibitor, PI3K inhibitor	Pro-Apoptosis
gambogic-acid	caspase activator	Pro-Apoptosis
amygdalin	caspase activator	Pro-Apoptosis
PETCM	caspase activator	Pro-Apoptosis
VX-765	caspase inhibitor	Other
entacapone	catechol O methyltransferase inhibitor	Neurotransmitter Inhibitor
tolcapone	catechol O methyltransferase inhibitor	Neurotransmitter Inhibitor
2-cyanopyrimidine	cathepsin inhibitor	Protein Metabolism Inhibitor
odanacatib	cathepsin inhibitor	Protein Metabolism Inhibitor
cathepsin-inhibitor-1	cathepsin inhibitor	Protein Metabolism Inhibitor
benzyldimethylhexadecylammonium	cationic surfactant	Ion Channel Regulation
PF-04136309	CC chemokine receptor antagonist	Inflammatory/Immune
danirixin	CC chemokine receptor antagonist	Inflammatory/Immune
reparixin	CC chemokine receptor antagonist	Inflammatory/Immune
vicriviroc	CC chemokine receptor antagonist	Inflammatory/Immune
UNBS-5162	CC chemokine receptor antagonist	Inflammatory/Immune
AMG-487	CC chemokine receptor antagonist	Inflammatory/Immune
SB-225002	CC chemokine receptor antagonist	Inflammatory/Immune
MK-0812	CC chemokine receptor antagonist	Inflammatory/Immune
ZK811752	CC chemokine receptor antagonist	Inflammatory/Immune
pentagastrin	CCK receptor agonist	G-Coupled Receptor Regulator
SR-27897	CCK receptor antagonist	G-Coupled Receptor Regulator
benzotript	CCK receptor antagonist	G-Coupled Receptor Regulator
L-365260	CCK receptor antagonist	G-Coupled Receptor Regulator
SB-328437	CCR antagonist	Inflammatory/Immune
PHA-767491	CDC inhibitor	Pro-Apoptosis
NSC-663284	CDC inhibitor	Pro-Apoptosis
olomoucine	CDK inhibitor	Pro-Apoptosis
R547	CDK inhibitor	Pro-Apoptosis
PHA-793887	CDK inhibitor	Pro-Apoptosis
JNJ-7706621	CDK inhibitor	Pro-Apoptosis
AZD5438	CDK inhibitor	Pro-Apoptosis
indisulam	CDK inhibitor	Pro-Apoptosis
DRF053-(R)	CDK inhibitor	Pro-Apoptosis
AT-7519	CDK inhibitor	Pro-Apoptosis
NU6027	CDK inhibitor	Pro-Apoptosis
BMS-265246	CDK inhibitor	Pro-Apoptosis
abemaciclib	CDK inhibitor	Pro-Apoptosis
P276-00	CDK inhibitor	Pro-Apoptosis
dinaciclib	CDK inhibitor	Pro-Apoptosis
alvocidib	CDK inhibitor	Pro-Apoptosis
CR8-(R)	CDK inhibitor	Pro-Apoptosis
BS-181	CDK inhibitor	Pro-Apoptosis
BMS-387032	CDK inhibitor, cell cycle inhibitor, MCL1 inhibitor	DNA Replication Inhibitor
7-hydroxystaurosporine	CDK inhibitor, CHK inhibitor, PKC inhibitor	DNA Replication Inhibitor
TG-02	CDK inhibitor, FLT3 inhibitor, JAK inhibitor	Pro-Apoptosis
kenpaullone	CDK inhibitor, glycogen synthase kinase inhibitor	Pro-Apoptosis
PHA-848125	CDK inhibitor, growth factor receptor inhibitor	Growth Factor Inhibitors
rigosertib	cell cycle inhibitor, PLK inhibitor	DNA Replication Inhibitor
GW-2580	cFMS kinase inhibitor	Pro-Apoptosis
tezacaftor	CFTR channel agonist	Ion Channel Regulation
clioquinol	chelating agent	DNA Replication Inhibitor
picolinic-acid	chelating agent	DNA Replication Inhibitor
pentetic-acid	chelating agent	DNA Replication Inhibitor
deferiprone	chelating agent	DNA Replication Inhibitor
dexrazoxane	chelating agent, topoisomerase inhibitor	DNA Replication Inhibitor
LY2603618	CHK inhibitor	DNA Replication Inhibitor
LY2606368	CHK inhibitor	DNA Replication Inhibitor
PF-477736	CHK inhibitor	DNA Replication Inhibitor
AZD7762	CHK inhibitor	DNA Replication Inhibitor
SCH-900776	CHK inhibitor	DNA Replication Inhibitor
CHIR-124	CHK inhibitor	DNA Replication Inhibitor
SB-218078	CHK inhibitor	DNA Replication Inhibitor
lubiprostone	chloride channel activator	Ion Channel Regulation
alfaxalone	chloride channel agonist, benzodiazepine receptor agonist	Ion Channel Regulation
moxidectin	chloride channel antagonist	Ion Channel Regulation
benzbromarone	chloride channel blocker	Ion Channel Regulation
flufenamic-acid	chloride channel blocker	Ion Channel Regulation
NPPB	chloride channel blocker	Ion Channel Regulation
trichlormethiazide	chloride channel blocker	Ion Channel Regulation
CFTRinh-172	chloride channel blocker	Ion Channel Regulation
DCPIB	chloride channel blocker, gap junction modulator, glutamate inhibitor	Ion Channel Regulation
methyclothiazide	chloride reabsorption inhibitor	Ion Channel Regulation
genipin	choleretic agent	Other
acifran	cholesterol inhibitor	Lipid Metabolism Inhibitor
ursodeoxycholyltaurine	cholesterol inhibitor	Lipid Metabolism Inhibitor
ezetimibe	cholesterol inhibitor, Niemann-Pick C1-like 1 protein antagonist	Lipid Metabolism Inhibitor
torcetrapib	cholesteryl ester transfer protein inhibitor	Lipid Metabolism Inhibitor
anacetrapib	cholesteryl ester transfer protein inhibitor	Lipid Metabolism Inhibitor
PNU-282987	cholinergic receptor agonist	Neurotransmitter Inhibitor
carbachol	cholinergic receptor agonist	Neurotransmitter Inhibitor
caramiphen	cholinergic receptor antagonist	Neurotransmitter Inhibitor
oxyphencyclimine	cholinergic receptor antagonist	Neurotransmitter Inhibitor
pentolinium	cholinergic receptor antagonist	Neurotransmitter Inhibitor
terodiline	cholinergic receptor antagonist	Neurotransmitter Inhibitor
hexamethonium	cholinergic receptor antagonist	Neurotransmitter Inhibitor
benzoquinonium-dibromide	cholinergic receptor antagonist	Neurotransmitter Inhibitor
pipenzolate	cholinergic receptor antagonist	Neurotransmitter Inhibitor
butylscopolamine-bromide	cholinergic receptor antagonist	Neurotransmitter Inhibitor
mestinon	cholinesterase inhibitor	Neurotransmitter Inhibitor
obidoxime	cholinesterase reactivator	Neurotransmitter Inhibitor
otamixaban	coagulation factor inhibitor	Angiogenesis Inhibitor
edoxaban	coagulation factor inhibitor	Angiogenesis Inhibitor
betrixaban	coagulation factor inhibitor	Angiogenesis Inhibitor
pantethine	coenzyme A precursor	Lipid Metabolism Activator
halofuginone	collagenase inhibitor	Protein Metabolism Inhibitor
halofuginone	collagenase inhibitor	Protein Metabolism Inhibitor
PD-166793	collagenase inhibitor, metalloproteinase inhibitor	Protein Metabolism Inhibitor
lacosamide	collapsin response mediator protein inhibitor, collapsin response mediator protein stimulant, sodium channel blocker	Ion Channel Regulation
erythrosine	coloring agent	Other
meclizine	constitutive androstane receptor (CAR) agonist	Lipid Metabolism Activator
estradiol-benzoate	contraceptive agent	Other
gestodene	contraceptive agent	Other
indocyanine-green	contrast agent	Other
clobetasone-butyrate	corticosteroid agonist	Inflammatory/Immune
allantoin	cosmetic	Other
isopropyl-palmitate	cosmetic moisturizer	Other
aminothiazole	cyclin D inhibitor	DNA Replication Inhibitor
nepafenac	cyclooxygenase inhibitor	Inflammatory/Immune
tenoxicam	cyclooxygenase inhibitor	Inflammatory/Immune
pasiniazid	cyclooxygenase inhibitor	Inflammatory/Immune
nabumetone	cyclooxygenase inhibitor	Inflammatory/Immune
etofenamate	cyclooxygenase inhibitor	Inflammatory/Immune
proquazone	cyclooxygenase inhibitor	Inflammatory/Immune
FR-122047	cyclooxygenase inhibitor	Inflammatory/Immune
nimesulide	cyclooxygenase inhibitor	Inflammatory/Immune
etoricoxib	cyclooxygenase inhibitor	Inflammatory/Immune
naproxen	cyclooxygenase inhibitor	Inflammatory/Immune
mabuprofen	cyclooxygenase inhibitor	Inflammatory/Immune
mofezolac	cyclooxygenase inhibitor	Inflammatory/Immune
tryptanthrin	cyclooxygenase inhibitor	Inflammatory/Immune
mefenamic-acid	cyclooxygenase inhibitor	Inflammatory/Immune
ketorolac	cyclooxygenase inhibitor	Inflammatory/Immune
piroxicam	cyclooxygenase inhibitor	Inflammatory/Immune
meloxicam	cyclooxygenase inhibitor	Inflammatory/Immune
propacetamol	cyclooxygenase inhibitor	Inflammatory/Immune
suxibuzone	cyclooxygenase inhibitor	Inflammatory/Immune
deracoxib	cyclooxygenase inhibitor	Inflammatory/Immune
fenbufen	cyclooxygenase inhibitor	Inflammatory/Immune
piketoprofen	cyclooxygenase inhibitor	Inflammatory/Immune
pranoprofen	cyclooxygenase inhibitor	Inflammatory/Immune
asaraldehyde	cyclooxygenase inhibitor	Inflammatory/Immune
rutaecarpine	cyclooxygenase inhibitor	Inflammatory/Immune
flurbiprofen-(S)-(+)	cyclooxygenase inhibitor	Inflammatory/Immune
aspirin	cyclooxygenase inhibitor	Inflammatory/Immune
valdecoxib	cyclooxygenase inhibitor	Inflammatory/Immune
zaltoprofen	cyclooxygenase inhibitor	Inflammatory/Immune
diftalone	cyclooxygenase inhibitor	Inflammatory/Immune
famprofazone	cyclooxygenase inhibitor	Inflammatory/Immune
salicylic-acid	cyclooxygenase inhibitor	Inflammatory/Immune
flurbiprofen-(+/-)	cyclooxygenase inhibitor	Inflammatory/Immune
ibuprofen-(s)	cyclooxygenase inhibitor	Inflammatory/Immune
fentiazac	cyclooxygenase inhibitor	Inflammatory/Immune
sulfasalazine	cyclooxygenase inhibitor	Inflammatory/Immune
parecoxib	cyclooxygenase inhibitor	Inflammatory/Immune
metoxibutropate	cyclooxygenase inhibitor	Inflammatory/Immune
geniposidic-acid	cyclooxygenase inhibitor	Inflammatory/Immune
indomethacin	cyclooxygenase inhibitor	Inflammatory/Immune
ibuprofen	cyclooxygenase inhibitor	Inflammatory/Immune
carprofen	cyclooxygenase inhibitor	Inflammatory/Immune
phenacetin	cyclooxygenase inhibitor	Inflammatory/Immune
amtolmetin-guacil	cyclooxygenase inhibitor	Inflammatory/Immune
tenidap	cyclooxygenase inhibitor	Inflammatory/Immune
FK-3311	cyclooxygenase inhibitor	Inflammatory/Immune
ebselen	cyclooxygenase inhibitor, glutathione peroxidase agonist, H+/K+-ATPase inhibitor, nitric oxide synthase inhibitor	Inflammatory/Immune
curcumin	cyclooxygenase inhibitor, histone acetyltransferase inhibitor, lipoxygenase inhibitor, NFkB pathway inhibitor	Inflammatory/Immune
FPL-62064	cyclooxygenase inhibitor, lipoxygenase inhibitor	Inflammatory/Immune
iguratimod	cyclooxygenase inhibitor, NFkB pathway inhibitor	Inflammatory/Immune
indobufen	cyclooxygenase inhibitor, platelet aggregation inhibitor	Inflammatory/Immune
ibuproxam	cyclooxygenase inhibitor, prostaglandin inhibitor	Inflammatory/Immune
gamma-linolenic-acid	cyclooxygenase inhibitor, prostanoid receptor agonist	Inflammatory/Immune
meclofenamic-acid	cyclooxygenase inhibitor, prostanoid receptor antagonist	Inflammatory/Immune
E-64	cysteine protease inhibitor, calpain inhibitor	Protein Degradation Inhibitors
eplerenone	cytochrome P450 inhibitor	Protein Synthesis Inhibitor
pinocembrin	cytochrome P450 inhibitor	Protein Synthesis Inhibitor
PF-4981517	cytochrome P450 inhibitor	Protein Synthesis Inhibitor
naringin	cytochrome P450 inhibitor	Protein Synthesis Inhibitor
morin	cytochrome P450 inhibitor	Protein Synthesis Inhibitor
piperonyl-butoxide	cytochrome P450 inhibitor	Protein Synthesis Inhibitor
RU-28318	cytochrome P450 inhibitor	Protein Synthesis Inhibitor
cobicistat	cytochrome P450 inhibitor	Protein Synthesis Inhibitor
VT-464	cytochrome P450 inhibitor	Protein Synthesis Inhibitor
silibinin	cytochrome P450 inhibitor	Protein Synthesis Inhibitor
isavuconazole	cytochrome P450 inhibitor	Protein Synthesis Inhibitor
clotrimazole	cytochrome P450 inhibitor, imidazoline receptor ligand	Protein Synthesis Inhibitor
erythromycin-ethylsuccinate	cytochrome P450 inhibitor, protein synthesis inhibitor	Protein Synthesis Inhibitor
JTE-607	cytokine production inhibitor	Inflammatory/Immune
mepacrine	cytokine production inhibitor, NFkB pathway inhibitor, TP53 activator	Inflammatory/Immune
azathioprine	dehydrogenase inhibitor	DNA Replication Inhibitor
mycophenolic-acid	dehydrogenase inhibitor, inositol monophosphatase inhibitor	Inflammatory/Immune
WP1130	deubiquitinase inhibitor	Protein Degradation Inhibitors
R-59022	diacylglycerol kinase inhibitor, protein kinase inhibitor	Lipid Metabolism Inhibitor
AZD7687	diacylglycerol O acyltransferase inhibitor	Lipid Metabolism Inhibitor
PF-04620110	diacylglycerol O acyltransferase inhibitor	Lipid Metabolism Inhibitor
diaveridine	dihydrofolate reductase inhibitor	DNA Replication Inhibitor
sulfameter	dihydrofolate reductase inhibitor	DNA Replication Inhibitor
succinylsulfathiazole	dihydrofolate reductase inhibitor	DNA Replication Inhibitor
methotrexate	dihydrofolate reductase inhibitor	DNA Replication Inhibitor
pralatrexate	dihydrofolate reductase inhibitor	DNA Replication Inhibitor
pyrimethamine	dihydrofolate reductase inhibitor	DNA Replication Inhibitor
pemetrexed	dihydrofolate reductase inhibitor, thymidylate synthase inhibitor	DNA Replication Inhibitor
brequinar	dihydroorotate dehydrogenase inhibitor	DNA Replication Inhibitor
sulfadoxine	dihydropteroate synthase inhibitor	DNA Replication Inhibitor
sulphadimethoxine	dihydropteroate synthetase inhibitor	DNA Replication Inhibitor
sulfaphenazole	dihydropteroate synthetase inhibitor	DNA Replication Inhibitor
NVP-DPP728	dipeptidyl peptidase inhibitor	Growth Factor Inhibitors
sitagliptin	dipeptidyl peptidase inhibitor	Growth Factor Inhibitors
alogliptin	dipeptidyl peptidase inhibitor	Growth Factor Inhibitors
saxagliptin	dipeptidyl peptidase inhibitor	Growth Factor Inhibitors
vildagliptin	dipeptidyl peptidase inhibitor	Growth Factor Inhibitors
TH-302	DNA alkylating agent	DNA Replication Inhibitor
satraplatin	DNA alkylating agent	DNA Replication Inhibitor
estramustine	DNA alkylating agent	DNA Replication Inhibitor
streptozotocin	DNA alkylating agent	DNA Replication Inhibitor
ifosfamide	DNA alkylating agent	DNA Replication Inhibitor
dianhydrogalactitol	DNA alkylating agent	DNA Replication Inhibitor
melphalan	DNA alkylating agent, DNA inhibitor	DNA Replication Inhibitor
carmustine	DNA alkylating agent, DNA inhibitor	DNA Replication Inhibitor
mitomycin-c	DNA alkylating agent, DNA synthesis inhibitor	DNA Replication Inhibitor
ambazone	DNA damage inducer	Pro-Apoptosis
NU-7441	DNA dependent protein kinase inhibitor	DNA Replication Inhibitor
idoxuridine	DNA directed DNA polymerase inhibitor	DNA Replication Inhibitor
brivudine	DNA directed DNA polymerase inhibitor	DNA Replication Inhibitor
trifluridine	DNA directed DNA polymerase inhibitor, thymidylate synthase inhibitor	DNA Replication Inhibitor
metronidazole	DNA inhibitor	DNA Replication Inhibitor
pibenzimol	DNA inhibitor	DNA Replication Inhibitor
cordycepin	DNA inhibitor	DNA Replication Inhibitor
busulfan	DNA inhibitor	DNA Replication Inhibitor
sangivamycin	DNA inhibitor	DNA Replication Inhibitor
teroxirone	DNA inhibitor	DNA Replication Inhibitor
oxaliplatin	DNA inhibitor	DNA Replication Inhibitor
tirapazamine	DNA inhibitor	DNA Replication Inhibitor
mechlorethamine	DNA inhibitor	DNA Replication Inhibitor
nitrofurantoin	DNA inhibitor	DNA Replication Inhibitor
nifurtimox	DNA inhibitor	DNA Replication Inhibitor
valrubicin	DNA inhibitor, topoisomerase inhibitor	DNA Replication Inhibitor
echinomycin	DNA intercalating agent	Cytoskeleton Organization Inhibitor
decitabine	DNA methyltransferase inhibitor	Histone/Methylation Inhibitor
SGI-1027	DNA methyltransferase inhibitor	Histone/Methylation Inhibitor
azacitidine	DNA methyltransferase inhibitor	Histone/Methylation Inhibitor
fdcyd	DNA methyltransferase inhibitor	Histone/Methylation Inhibitor
ganciclovir	DNA polymerase inhibitor	DNA Replication Inhibitor
valaciclovir	DNA polymerase inhibitor	DNA Replication Inhibitor
cidofovir	DNA polymerase inhibitor	DNA Replication Inhibitor
cephalomannine	DNA polymerase inhibitor	DNA Replication Inhibitor
bakuchiol	DNA polymerase inhibitor	DNA Replication Inhibitor
torcitabine	DNA polymerase inhibitor	DNA Replication Inhibitor
acyclovir	DNA polymerase inhibitor	DNA Replication Inhibitor
foscarnet	DNA polymerase inhibitor	DNA Replication Inhibitor
PIK-75	DNA protein kinase inhibitor, PI3K inhibitor	Pro-Apoptosis
niclosamide	DNA replication inhibitor, STAT inhibitor	DNA Replication Inhibitor
trioxsalen	DNA synthesis inhibitor	DNA Replication Inhibitor
valganciclovir	DNA synthesis inhibitor	DNA Replication Inhibitor
floxuridine	DNA synthesis inhibitor	DNA Replication Inhibitor
anisomycin	DNA synthesis inhibitor	DNA Replication Inhibitor
enocitabine	DNA synthesis inhibitor	DNA Replication Inhibitor
artesunate	DNA synthesis inhibitor	DNA Replication Inhibitor
fiacitabine	DNA synthesis inhibitor	DNA Replication Inhibitor
altretamine	DNA synthesis inhibitor	DNA Replication Inhibitor
artemisinin	DNA synthesis inhibitor	DNA Replication Inhibitor
CB-10-277	DNA synthesis inhibitor	DNA Replication Inhibitor
estramustine-phosphate	DNA synthesis inhibitor, microtubule inhibitor	Cytoskeleton Organization Inhibitor
cyclocytidine	DNA synthesis inhibitor, RNA synthesis inhibitor	DNA Replication Inhibitor
nepicastat	dopamine beta hydroxylase inhibitor	Neurotransmitter Inhibitor
ropinirole	dopamine receptor agonist	Neurotransmitter Inhibitor
dopamine	dopamine receptor agonist	Neurotransmitter Inhibitor
quinagolide	dopamine receptor agonist	Neurotransmitter Inhibitor
preclamol	dopamine receptor agonist	Neurotransmitter Inhibitor
amineptine	dopamine receptor agonist	Neurotransmitter Inhibitor
fenoldopam	dopamine receptor agonist	Neurotransmitter Inhibitor
CS-110266	dopamine receptor agonist	Neurotransmitter Inhibitor
SKF-77434	dopamine receptor agonist	Neurotransmitter Inhibitor
etilevodopa	dopamine receptor agonist	Neurotransmitter Inhibitor
pramipexole	dopamine receptor agonist	Neurotransmitter Inhibitor
piribedil	dopamine receptor agonist	Neurotransmitter Inhibitor
quinelorane	dopamine receptor agonist	Neurotransmitter Inhibitor
rotigotine	dopamine receptor agonist	Neurotransmitter Inhibitor
PD-128907	dopamine receptor agonist	Neurotransmitter Inhibitor
terguride	dopamine receptor agonist, serotonin receptor antagonist	Neurotransmitter Inhibitor
amisulpride	dopamine receptor antagonist	Neurotransmitter Inhibitor
acetophenazine	dopamine receptor antagonist	Neurotransmitter Inhibitor
L-741742	dopamine receptor antagonist	Neurotransmitter Inhibitor
promazine	dopamine receptor antagonist	Neurotransmitter Inhibitor
pipamperone	dopamine receptor antagonist	Neurotransmitter Inhibitor
butaclamol	dopamine receptor antagonist	Neurotransmitter Inhibitor
UH-232-(+)	dopamine receptor antagonist	Neurotransmitter Inhibitor
prochlorperazine	dopamine receptor antagonist	Neurotransmitter Inhibitor
fluspirilene	dopamine receptor antagonist	Neurotransmitter Inhibitor
domperidone	dopamine receptor antagonist	Neurotransmitter Inhibitor
pimozide	dopamine receptor antagonist	Neurotransmitter Inhibitor
acepromazine	dopamine receptor antagonist	Neurotransmitter Inhibitor
itopride	dopamine receptor antagonist	Neurotransmitter Inhibitor
isofloxythepin	dopamine receptor antagonist	Neurotransmitter Inhibitor
JNJ-37822681	dopamine receptor antagonist	Neurotransmitter Inhibitor
U-99194	dopamine receptor antagonist	Neurotransmitter Inhibitor
amperozide	dopamine receptor antagonist	Neurotransmitter Inhibitor
triflupromazine	dopamine receptor antagonist	Neurotransmitter Inhibitor
spiperone	dopamine receptor antagonist	Neurotransmitter Inhibitor
levomepromazine	dopamine receptor antagonist	Neurotransmitter Inhibitor
remoxipride	dopamine receptor antagonist	Neurotransmitter Inhibitor
nafadotride	dopamine receptor antagonist	Neurotransmitter Inhibitor
alizapride	dopamine receptor antagonist	Neurotransmitter Inhibitor
droperidol	dopamine receptor antagonist	Neurotransmitter Inhibitor
thiethylperazine	dopamine receptor antagonist	Neurotransmitter Inhibitor
tiapride	dopamine receptor antagonist	Neurotransmitter Inhibitor
perphenazine	dopamine receptor antagonist	Neurotransmitter Inhibitor
benperidol	dopamine receptor antagonist	Neurotransmitter Inhibitor
flupentixol	dopamine receptor antagonist	Neurotransmitter Inhibitor
SKF-83566	dopamine receptor antagonist	Neurotransmitter Inhibitor
phenothiazine	dopamine receptor antagonist	Neurotransmitter Inhibitor
fluphenazine	dopamine receptor antagonist	Neurotransmitter Inhibitor
chlorprothixene	dopamine receptor antagonist	Neurotransmitter Inhibitor
oxiperomide	dopamine receptor antagonist	Neurotransmitter Inhibitor
sulpiride	dopamine receptor antagonist	Neurotransmitter Inhibitor
chlorpromazine	dopamine receptor antagonist	Neurotransmitter Inhibitor
melperone	dopamine receptor antagonist, serotonin receptor antagonist	Neurotransmitter Inhibitor
piricapiron	dopamine receptor antagonist, serotonin receptor antagonist	Neurotransmitter Inhibitor
olanzapine	dopamine receptor antagonist, serotonin receptor antagonist	Neurotransmitter Inhibitor
perospirone	dopamine receptor antagonist, serotonin receptor antagonist	Neurotransmitter Inhibitor
fananserin	dopamine receptor antagonist, serotonin receptor antagonist	Neurotransmitter Inhibitor
zotepine	dopamine receptor antagonist, serotonin receptor antagonist	Neurotransmitter Inhibitor
quetiapine	dopamine receptor antagonist, serotonin receptor antagonist	Neurotransmitter Inhibitor
ziprasidone	dopamine receptor antagonist, serotonin receptor antagonist	Neurotransmitter Inhibitor
risperidone	dopamine receptor antagonist, serotonin receptor antagonist	Neurotransmitter Inhibitor
blonanserin	dopamine receptor antagonist, serotonin receptor antagonist	Neurotransmitter Inhibitor
pipotiazine-palmitate	dopamine receptor antagonist, serotonin receptor antagonist	Neurotransmitter Inhibitor
loxapine	dopamine receptor antagonist, serotonin receptor antagonist	Neurotransmitter Inhibitor
clozapine	dopamine receptor antagonist, serotonin receptor antagonist	Neurotransmitter Inhibitor
lurasidone	dopamine receptor antagonist, serotonin receptor antagonist	Neurotransmitter Inhibitor
sertindole	dopamine receptor antagonist, serotonin receptor antagonist	Neurotransmitter Inhibitor
paliperidone	dopamine receptor antagonist, serotonin receptor antagonist	Neurotransmitter Inhibitor
3-fluorobenzylspiperone,dopamine receptor ligand,All,HTS,(Intercept),-0.0005961205209723541,1.0002980158537615,0.2596970246739597,0.3203816408181503,0.8105864743397223,0.4179506261479682,0.41383713404353506
1,6958,3-fluorobenzylspiperone	dopamine receptor ligand	Neurotransmitter Inhibitor
8-hydroxy-PIPAT	dopamine receptor ligand	Neurotransmitter Inhibitor
brexpiprazole	dopamine receptor partial agonist	Neurotransmitter Inhibitor
diclofensine	dopamine reuptake inhibitor	Neurotransmitter Inhibitor
mazindol	dopamine reuptake inhibitor, selective serotonin reuptake inhibitor (SSRI)	Neurotransmitter Inhibitor
bromantan	dopamine reuptake inhibitor, serotonin reuptake inhibitor	Neurotransmitter Inhibitor
DIPT	dopamine reuptake inhibitor, serotonin reuptake inhibitor	Neurotransmitter Inhibitor
3-alpha-bis-(4-fluorophenyl)-methoxytropane	dopamine uptake inhibitor	Neurotransmitter Inhibitor
GBR-12935	dopamine uptake inhibitor	Neurotransmitter Inhibitor
diphenylpyraline	dopamine uptake inhibitor	Neurotransmitter Inhibitor
vanoxerine	dopamine uptake inhibitor	Neurotransmitter Inhibitor
GBR-13069	dopamine uptake inhibitor	Neurotransmitter Inhibitor
methylphenidate	dopamine-norepinephrine reuptake inhibitor	Neurotransmitter Inhibitor
BTZ043-racemate	DPRE1 inhibitor	Cytoskeleton Organization Inhibitor
PR-619	DUB inhibitor	Protein Degradation Inhibitors
gefitinib	EGFR inhibitor	Growth Factor Inhibitors
canertinib	EGFR inhibitor	Growth Factor Inhibitors
CNX-2006	EGFR inhibitor	Growth Factor Inhibitors
GW-583340	EGFR inhibitor	Growth Factor Inhibitors
erlotinib	EGFR inhibitor	Growth Factor Inhibitors
chrysophanic-acid	EGFR inhibitor	Growth Factor Inhibitors
pelitinib	EGFR inhibitor	Growth Factor Inhibitors
FERb-033	EGFR inhibitor	Growth Factor Inhibitors
WZ-3146	EGFR inhibitor	Growth Factor Inhibitors
CUDC-101	EGFR inhibitor	Growth Factor Inhibitors
AZD8931	EGFR inhibitor	Growth Factor Inhibitors
EGF816	EGFR inhibitor	Growth Factor Inhibitors
afatinib	EGFR inhibitor	Growth Factor Inhibitors
lapatinib	EGFR inhibitor	Growth Factor Inhibitors
rociletinib	EGFR inhibitor	Growth Factor Inhibitors
AST-1306	EGFR inhibitor	Growth Factor Inhibitors
neratinib	EGFR inhibitor	Growth Factor Inhibitors
osimertinib	EGFR inhibitor	Growth Factor Inhibitors
dacomitinib	EGFR inhibitor	Growth Factor Inhibitors
tucatinib	EGFR inhibitor	Growth Factor Inhibitors
dovitinib	EGFR inhibitor, FGFR inhibitor, FLT3 inhibitor, PDGFR tyrosine kinase receptor inhibitor, VEGFR inhibitor	Growth Factor Inhibitors
CP-724714	EGFR inhibitor, protein tyrosine kinase inhibitor	Growth Factor Inhibitors
AEE788	EGFR inhibitor, VEGFR inhibitor	Growth Factor Inhibitors
AZD9668	elastase inhibitor	Protein Metabolism Inhibitor
DMP-777	elastase inhibitor	Protein Metabolism Inhibitor
sivelestat	elastase inhibitor	Protein Metabolism Inhibitor
azosemide	electrolyte reabsorption inhibitor	Ion Channel Regulation
torasemide	electrolyte reabsorption inhibitor, thromboxane receptor antagonist	Ion Channel Regulation
torasemide	electrolyte reabsorption inhibitor, thromboxane receptor antagonist	Ion Channel Regulation
nadide	electron acceptor	Ion Channel Regulation
macitentan	endothelin receptor antagonist	Angiogenesis Inhibitor
darusentan	endothelin receptor antagonist	Angiogenesis Inhibitor
FR-139317	endothelin receptor antagonist	Angiogenesis Inhibitor
IRL-2500	endothelin receptor antagonist	Angiogenesis Inhibitor
sitaxentan	endothelin receptor antagonist	Angiogenesis Inhibitor
racecadotril	enkephalinase inhibitor	Neurotransmitter Enhancer
D-Phenylalanine	enkephalinase inhibitor	Neurotransmitter Enhancer
climbazole	enzyme inducer	Other
NVP-BHG712	ephrin inhibitor	Pro-Apoptosis
erteberel	estrogen receptor agonist	Growth Hormone Inhibitor
daidzein	estrogen receptor agonist	Growth Hormone Inhibitor
WAY-200070	estrogen receptor agonist	Growth Hormone Inhibitor
estropipate	estrogen receptor agonist	Growth Hormone Inhibitor
mestranol	estrogen receptor agonist	Growth Hormone Inhibitor
diethylstilbestrol	estrogen receptor agonist	Growth Hormone Inhibitor
estradiol-cypionate	estrogen receptor agonist	Growth Hormone Inhibitor
MF-101	estrogen receptor agonist	Growth Hormone Inhibitor
dienestrol	estrogen receptor agonist	Growth Hormone Inhibitor
quinestrol	estrogen receptor agonist	Growth Hormone Inhibitor
ethinyl-estradiol	estrogen receptor agonist, estrogenic hormone	Growth Hormone Inhibitor
levonorgestrel	estrogen receptor agonist, glucocorticoid receptor antagonist, progesterone receptor agonist, progesterone receptor antagonist	Growth Hormone Inhibitor
clomifene	estrogen receptor antagonist	Growth Hormone Inhibitor
ZK-164015	estrogen receptor antagonist	Growth Hormone Inhibitor
danazol	estrogen receptor antagonist, progesterone receptor agonist	Growth Hormone Inhibitor
raloxifene	estrogen receptor antagonist, selective estrogen receptor modulator (SERM)	Growth Hormone Inhibitor
tamoxifen	estrogen receptor antagonist, selective estrogen receptor modulator (SERM)	Growth Hormone Inhibitor
toremifene	estrogen receptor antagonist, selective estrogen receptor modulator (SERM)	Growth Hormone Inhibitor
DY131	estrogen-related receptor agonist	Growth Hormone Inhibitor
chlorotrianisene	estrogenic hormone	Growth Hormone Inhibitor
NH125	eukaryotic translation elongation factor 2 inhibitor	Protein Synthesis Inhibitor
sal003	eukaryotic translation initiation factor inhibitor	Protein Synthesis Inhibitor
meglumine	excipient	Other
TBOA-(DL)	excitatory amino acid transporter inhibitor	Neurotransmitter Inhibitor
guaifenesin	expectorant	Other
KPT-276	exportin antagonist	Pro-Apoptosis
KPT-185	exportin antagonist	Pro-Apoptosis
selinexor	exportin antagonist	Pro-Apoptosis
JNJ-1661010	FAAH inhibitor	Neurotransmitter Inhibitor
OMDM-2	FAAH inhibitor	Neurotransmitter Inhibitor
JNJ-42165279	FAAH inhibitor	Neurotransmitter Inhibitor
PF-04457845	FAAH inhibitor	Neurotransmitter Inhibitor
PF-3845	FAAH inhibitor	Neurotransmitter Inhibitor
LY2183240	FAAH inhibitor, FAAH reuptake inhibitor	Neurotransmitter Inhibitor
isoniazid	FABI inhibitor	Lipid Metabolism Activator
LB42708	farnesyltransferase inhibitor	Pro-Apoptosis
arglabin	farnesyltransferase inhibitor	Pro-Apoptosis
tipifarnib	farnesyltransferase inhibitor	Pro-Apoptosis
lonafarnib	farnesyltransferase inhibitor	Pro-Apoptosis
pyrazinamide	fatty acid synthase inhibitor	Lipid Metabolism Inhibitor
cianidanol	fatty acid synthase inhibitor	Lipid Metabolism Inhibitor
cerulenin	fatty acid synthase inhibitor	Lipid Metabolism Inhibitor
regorafenib	FGFR inhibitor, KIT inhibitor, PDGFR tyrosine kinase receptor inhibitor, RAF inhibitor, RET tyrosine kinase inhibitor, VEGFR inhibitor	Growth Factor Inhibitors
brivanib	FGFR inhibitor, VEGFR inhibitor	Growth Factor Inhibitors
hesperidin	flavanone glycoside	Oxidative Stress Inhibitors
lestaurtinib	FLT3 inhibitor, growth factor receptor inhibitor, JAK inhibitor	Growth Factor Inhibitors
TG-101348	FLT3 inhibitor, JAK inhibitor	Pro-Apoptosis
pacritinib	FLT3 inhibitor, JAK inhibitor	Pro-Apoptosis
amuvatinib	FLT3 inhibitor, KIT inhibitor, PDGFR tyrosine kinase receptor inhibitor, RAD51 inhibitor, RET tyrosine kinase inhibitor	Pro-Apoptosis
defactinib	focal adhesion kinase inhibitor	Pro-Apoptosis
PF-573228	focal adhesion kinase inhibitor	Pro-Apoptosis
VS-4718	focal adhesion kinase inhibitor	Pro-Apoptosis
PF-562271	focal adhesion kinase inhibitor	Pro-Apoptosis
leucovorin	folate receptor ligand	Inflammatory/Immune
folic-acid	folate receptor ligand	Inflammatory/Immune
thiostrepton	FOXM1 inhibitor, protein synthesis inhibitor	Protein Synthesis Inhibitor
AMG-837	free fatty acid receptor agonist	Lipid Metabolism Activator
rebamipide	free radical scavenger	Oxidative Stress Inhibitors
tempol	free radical scavenger	Oxidative Stress Inhibitors
anidulafungin	fungal 1,3-beta-D-glucan synthase inhibitor	Sugar Metabolism Inhibitor
caspofungin-acetate	fungal 1,3-beta-D-glucan synthase inhibitor	Sugar Metabolism Inhibitor
isoconazole	fungal lanosterol demethylase inhibitor	Cytoskeleton Organization Inhibitor
chlormidazole	fungal lanosterol demethylase inhibitor	Cytoskeleton Organization Inhibitor
naftifine	fungal squalene epoxidase inhibitor	Lipid Metabolism Activator
liranaftate	fungal squalene epoxidase inhibitor	Lipid Metabolism Activator
tolnaftate	fungal squalene epoxidase inhibitor	Lipid Metabolism Activator
GW-4064	FXR agonist	Lipid Metabolism Inhibitor
oleanolic-acid	G protein-coupled receptor agonist	G-Coupled Receptor Regulator
SB-756050	G protein-coupled receptor agonist	G-Coupled Receptor Regulator
taurocholate	G protein-coupled receptor agonist	G-Coupled Receptor Regulator
G-1	G protein-coupled receptor agonist	G-Coupled Receptor Regulator
vigabatrin	GABA aminotransferase inhibitor	Neurotransmitter Inhibitor
clonazepam	GABA benzodiazepine site receptor agonist	Neurotransmitter Inhibitor
triazolam	GABA benzodiazepine site receptor agonist	Neurotransmitter Inhibitor
clobazam	GABA benzodiazepine site receptor agonist	Neurotransmitter Inhibitor
oxazepam	GABA benzodiazepine site receptor agonist	Neurotransmitter Inhibitor
FG-7142	GABA benzodiazepine site receptor inverse agonist	Neurotransmitter Inhibitor
ginkgolide-a	GABA receptor antagonist	Neurotransmitter Inhibitor
NCS-382	GABA receptor antagonist	Neurotransmitter Inhibitor
CGP-54626	GABA receptor antagonist	Neurotransmitter Inhibitor
thiocolchicoside	GABA receptor antagonist	Neurotransmitter Inhibitor
saclofen	GABA receptor antagonist	Neurotransmitter Inhibitor
butalbital	GABA receptor antagonist	Neurotransmitter Inhibitor
primidone	GABA receptor antagonist	Neurotransmitter Inhibitor
gabazine	GABA receptor antagonist	Neurotransmitter Inhibitor
clomethiazole	GABA receptor antagonist, GABA receptor modulator	Neurotransmitter Inhibitor
kakonein	GABA receptor antagonist, serotonin receptor antagonist	Neurotransmitter Inhibitor
bilobalide	GABA receptor modulator	Neurotransmitter Inhibitor
lorediplon	GABA receptor modulator	Neurotransmitter Inhibitor
CGP-13501	GABA receptor modulator	Neurotransmitter Inhibitor
ganaxolone	GABA receptor modulator	Neurotransmitter Inhibitor
etomidate	GABA receptor modulator	Neurotransmitter Inhibitor
chlormezanone	GABA receptor modulator	Neurotransmitter Inhibitor
ocinaplon	GABA receptor modulator	Neurotransmitter Inhibitor
SB-205384	GABA receptor modulator	Neurotransmitter Inhibitor
enciprazine	GABA receptor modulator	Neurotransmitter Inhibitor
metharbital	GABA receptor modulator	Neurotransmitter Inhibitor
pregnenolone-succinate	GABA receptor negative allosteric modulator	Neurotransmitter Inhibitor
rosmarinic-acid	GABA transaminase inhibitor	Neurotransmitter Inhibitor
guvacine	GABA uptake inhibitor	Neurotransmitter Inhibitor
tiagabine	GABA uptake inhibitor	Neurotransmitter Inhibitor
NNC-05-2090	GABA uptake inhibitor, GAT inhibitor	Neurotransmitter Inhibitor
acivicin	gamma glutamyltransferase Inhibitors	Oxidative Stress Activator
trans-4-Hydroxycrotonic-acid	gamma hydroxybutyric acid ligand	Neurotransmitter Inhibitor
DAPT	gamma secretase inhibitor	Lipid Metabolism Activator
MK-0752	gamma secretase inhibitor	Lipid Metabolism Activator
semagacestat	gamma secretase inhibitor	Lipid Metabolism Activator
RG4733	gamma secretase inhibitor	Lipid Metabolism Activator
avagacestat	gamma secretase inhibitor	Lipid Metabolism Activator
E-2012	gamma secretase modulator	Lipid Metabolism Activator
danegaptide	gap junction modulator	Cytoskeleton Organization Inhibitor
tonabersat	gap junction modulator, nitric oxide production inhibitor	Pro-Apoptosis
CI-966	GAT inhibitor	Neurotransmitter Inhibitor
isobutyramide	gene expression stimulant	Other
clofazimine	GK0582 inhibitor	Growth Factor Inhibitors
geniposide	GLP receptor agonist	Growth Hormone Inhibitor
MK-0893	glucagon receptor antagonist	Sugar Metabolism Activator
deflazacort	glucocorticoid receptor agonist	Inflammatory/Immune
hydrocortisone-valerate	glucocorticoid receptor agonist	Inflammatory/Immune
halcinonide	glucocorticoid receptor agonist	Inflammatory/Immune
piretanide	glucocorticoid receptor agonist	Inflammatory/Immune
methylprednisolone-sodium-succinate	glucocorticoid receptor agonist	Inflammatory/Immune
fluticasone-propionate	glucocorticoid receptor agonist	Inflammatory/Immune
ciclesonide	glucocorticoid receptor agonist	Inflammatory/Immune
rimexolone	glucocorticoid receptor agonist	Inflammatory/Immune
prednisolone-hemisuccinate	glucocorticoid receptor agonist	Inflammatory/Immune
dexamethasone	glucocorticoid receptor agonist	Inflammatory/Immune
fluorometholone	glucocorticoid receptor agonist	Inflammatory/Immune
alclometasone-dipropionate	glucocorticoid receptor agonist	Inflammatory/Immune
medrysone	glucocorticoid receptor agonist	Inflammatory/Immune
halobetasol-propionate	glucocorticoid receptor agonist	Inflammatory/Immune
flumethasone-pivalate	glucocorticoid receptor agonist	Inflammatory/Immune
betamethasone	glucocorticoid receptor agonist	Inflammatory/Immune
beclomethasone	glucocorticoid receptor agonist	Inflammatory/Immune
cortisone	glucocorticoid receptor agonist	Inflammatory/Immune
hydrocortisone-acetate	glucocorticoid receptor agonist	Inflammatory/Immune
desonide	glucocorticoid receptor agonist	Inflammatory/Immune
hydrocortisone	glucocorticoid receptor agonist	Inflammatory/Immune
fluocinonide	glucocorticoid receptor agonist	Inflammatory/Immune
betamethasone-valerate	glucocorticoid receptor agonist	Inflammatory/Immune
prednisolone-acetate	glucocorticoid receptor agonist	Inflammatory/Immune
beclomethasone-dipropionate	glucocorticoid receptor agonist	Inflammatory/Immune
fluocinolone-acetonide	glucocorticoid receptor agonist	Inflammatory/Immune
prednisone	glucocorticoid receptor agonist	Inflammatory/Immune
hydrocortisone-butyrate	glucocorticoid receptor agonist	Inflammatory/Immune
flumethasone	glucocorticoid receptor agonist	Inflammatory/Immune
prednisolone-sodium-phosphate	glucocorticoid receptor agonist	Inflammatory/Immune
methylprednisolone	glucocorticoid receptor agonist	Inflammatory/Immune
triamcinolone-acetonide	glucocorticoid receptor agonist, immunosuppressant	Inflammatory/Immune
mifepristone	glucocorticoid receptor antagonist, progesterone receptor antagonist	Inflammatory/Immune
LY2608204	glucokinase activator	Sugar Metabolism Activator
lonidamine	glucokinase inhibitor	Sugar Metabolism Inhibitor
MBX-2982	glucose dependent insulinotropic receptor agonist	Oxidative Stress Activator
GSK1292263	glucose dependent insulinotropic receptor agonist	Oxidative Stress Activator
voglibose	glucosidase inhibitor	Sugar Metabolism Inhibitor
miglitol	glucosidase inhibitor	Sugar Metabolism Inhibitor
riluzole	glutamate inhibitor	Ion Channel Regulation
chicago-sky-blue-6b	glutamate inhibitor, macrophage migration inhibiting factor inhibitor	Inflammatory/Immune
L-Cysteinesulfinic-acid	glutamate receptor agonist	Neurotransmitter Inhibitor
PHCCC	glutamate receptor agonist	Neurotransmitter Inhibitor
ATPA	glutamate receptor agonist	Neurotransmitter Inhibitor
D-Serine	glutamate receptor agonist	Neurotransmitter Inhibitor
HA-966-(R)-(+)	glutamate receptor agonist	Neurotransmitter Inhibitor
NMDA	glutamate receptor agonist	Neurotransmitter Inhibitor
L-Quisqualic-acid	glutamate receptor agonist	Neurotransmitter Inhibitor
cis-ACPD	glutamate receptor agonist	Neurotransmitter Inhibitor
aniracetam	glutamate receptor agonist	Neurotransmitter Inhibitor
BCI-540	glutamate receptor agonist	Neurotransmitter Inhibitor
quinolinic-acid	glutamate receptor agonist	Neurotransmitter Inhibitor
L-glutamic-acid	glutamate receptor agonist	Neurotransmitter Inhibitor
N-acetylglycyl-D-glutamic-acid	glutamate receptor agonist	Neurotransmitter Inhibitor
eglumetad	glutamate receptor agonist	Neurotransmitter Inhibitor
L-701252	glutamate receptor antagonist	Neurotransmitter Inhibitor
MPEP	glutamate receptor antagonist	Neurotransmitter Inhibitor
fenobam	glutamate receptor antagonist	Neurotransmitter Inhibitor
budipine	glutamate receptor antagonist	Neurotransmitter Inhibitor
3-carboxy-4-hydroxyphenylglycine-(S)	glutamate receptor antagonist	Neurotransmitter Inhibitor
dizocilpine-(+)	glutamate receptor antagonist	Neurotransmitter Inhibitor
PMPA	glutamate receptor antagonist	Neurotransmitter Inhibitor
3-carboxy-4-hydroxyphenylglycine-(R)	glutamate receptor antagonist	Neurotransmitter Inhibitor
CGP-37849	glutamate receptor antagonist	Neurotransmitter Inhibitor
DNQX	glutamate receptor antagonist	Neurotransmitter Inhibitor
basimglurant	glutamate receptor antagonist	Neurotransmitter Inhibitor
SYM-2206	glutamate receptor antagonist	Neurotransmitter Inhibitor
aptiganel	glutamate receptor antagonist	Neurotransmitter Inhibitor
felbamate	glutamate receptor antagonist	Neurotransmitter Inhibitor
SDZ-220-581	glutamate receptor antagonist	Neurotransmitter Inhibitor
L-701324	glutamate receptor antagonist	Neurotransmitter Inhibitor
CNQX	glutamate receptor antagonist	Neurotransmitter Inhibitor
perzinfotel	glutamate receptor antagonist	Neurotransmitter Inhibitor
ACDPP	glutamate receptor antagonist	Neurotransmitter Inhibitor
L-Theanine	glutamate receptor antagonist	Neurotransmitter Inhibitor
memantine	glutamate receptor antagonist	Neurotransmitter Inhibitor
mavoglurant	glutamate receptor antagonist	Neurotransmitter Inhibitor
perampanel	glutamate receptor antagonist	Neurotransmitter Inhibitor
CTEP	glutamate receptor antagonist	Neurotransmitter Inhibitor
SIB-1757	glutamate receptor antagonist	Neurotransmitter Inhibitor
spaglumic-acid	glutamate receptor antagonist	Neurotransmitter Inhibitor
MTPG	glutamate receptor antagonist	Neurotransmitter Inhibitor
NBQX	glutamate receptor antagonist	Neurotransmitter Inhibitor
AZD4282	glutamate receptor antagonist	Neurotransmitter Inhibitor
CPCCOEt	glutamate receptor antagonist	Neurotransmitter Inhibitor
HA-966-(S)-(-)	glutamate receptor antagonist	Neurotransmitter Inhibitor
eliprodil	glutamate receptor antagonist	Neurotransmitter Inhibitor
AZD6765	glutamate receptor antagonist	Neurotransmitter Inhibitor
latrepirdine	glutamate receptor antagonist	Neurotransmitter Inhibitor
LY456236	glutamate receptor antagonist	Neurotransmitter Inhibitor
1-(1,2-Diphenylethyl)piperidine-(+/-)	glutamate receptor antagonist	Neurotransmitter Inhibitor
kynurenic-acid	glutamate receptor antagonist	Neurotransmitter Inhibitor
caroverine	glutamate receptor antagonist, calcium channel blocker	Ion Channel Regulation
mibampator	glutamate receptor modulator	Ion Channel Regulation
pregnenolone	glutamate receptor modulator	Ion Channel Regulation
ADX-47273	glutamate receptor modulator	Ion Channel Regulation
dipraglurant	glutamate receptor negative allosteric modulator	Ion Channel Regulation
evans-blue	glutamate receptor negative allosteric modulator	Ion Channel Regulation
JNJ-40411813	glutamate receptor positive allosteric modulator	Neurotransmitter Enhancer
IDRA-21	glutamate receptor positive allosteric modulator	Neurotransmitter Enhancer
VU0361737	glutamate receptor positive allosteric modulator	Neurotransmitter Enhancer
VU0357121	glutamate receptor positive allosteric modulator	Neurotransmitter Enhancer
VU0364770	glutamate receptor positive allosteric modulator	Neurotransmitter Enhancer
anethole-trithione	glutathione transferase stimulant	Oxidative Stress Inhibitors
sarcosine	Glycine transporter 1 inhibitor	Neurotransmitter Inhibitor
LY2365109	Glycine transporter 1 inhibitor	Neurotransmitter Inhibitor
bitopertin	glycine transporter inhibitor, GlyT-1 inhibitor	Neurotransmitter Inhibitor
AR-A014418	glycogen synthase kinase inhibitor	Sugar Metabolism Activator
SB-415286	glycogen synthase kinase inhibitor	Sugar Metabolism Activator
SB-216763	glycogen synthase kinase inhibitor	Sugar Metabolism Activator
1-azakenpaullone	glycogen synthase kinase inhibitor	Sugar Metabolism Activator
TCS2002	glycogen synthase kinase inhibitor	Sugar Metabolism Activator
CHIR-98014	glycogen synthase kinase inhibitor	Sugar Metabolism Activator
AZD2858	glycogen synthase kinase inhibitor	Sugar Metabolism Activator
GSK-3-inhibitor-IX	glycogen synthase kinase inhibitor, lipoxygenase inhibitor	Inflammatory/Immune
clorsulon	glycolysis inhibitor	Sugar Metabolism Inhibitor
2-deoxyglucose	glycolysis inhibitor	Sugar Metabolism Inhibitor
miglustat	Glycosyl transferase inhibitor	Protein Metabolism Inhibitor
alagebrium	glycosylation inhibitor	Protein Metabolism Inhibitor
paroxypropione	gonadotropin inhibitor	Growth Hormone Inhibitor
triptorelin	gonadotropin releasing factor hormone receptor agonist	Growth Hormone Inhibitor
goserelin-acetate	gonadotropin releasing factor hormone receptor agonist	Growth Hormone Inhibitor
alarelin	gonadotropin releasing factor hormone receptor antagonist	Growth Hormone Inhibitor
degarelix	gonadotropin releasing factor hormone receptor antagonist	Growth Hormone Inhibitor
serotonin	growth factor receptor activator	Other
GW-441756	growth factor receptor inhibitor	Growth Factor Inhibitors
ibutamoren	growth hormone secretagogue receptor agonist	Growth Hormone Inhibitor
cinaciguat	guanylate cyclase activator	G-Coupled Receptor Regulator
CFM-1571	guanylate cyclase activator	G-Coupled Receptor Regulator
riociguat	guanylate cyclase stimulant	G-Coupled Receptor Regulator
etamsylate	haemostatic agent	Angiogenesis Activator
ivabradine	HCN channel antagonist, potassium channel blocker, sodium channel blocker	Ion Channel Regulation
zatebradine	HCN channel blocker	Ion Channel Regulation
ZD-7288	HCN channel blocker	Ion Channel Regulation
grazoprevir	HCV inhibitor	Protein Degradation Inhibitors
VCH-916	HCV inhibitor	Protein Degradation Inhibitors
simeprevir	HCV inhibitor	Protein Degradation Inhibitors
dasabuvir	HCV inhibitor	Protein Degradation Inhibitors
VX-222	HCV inhibitor	Protein Degradation Inhibitors
telaprevir	HCV inhibitor	Protein Degradation Inhibitors
asunaprevir	HCV inhibitor	Protein Degradation Inhibitors
ledipasvir	HCV inhibitor	Protein Degradation Inhibitors
mericitabine	HCV inhibitor	Protein Degradation Inhibitors
elbasvir	HCV inhibitor	Protein Degradation Inhibitors
danoprevir	HCV inhibitor	Protein Degradation Inhibitors
Ro-9187	HCV inhibitor	Protein Degradation Inhibitors
tegobuvir	HCV inhibitor, protease inhibitor	Protein Metabolism Inhibitor
embelin	HCV inhibitor, XIAP inhibitor	Pro-Apoptosis
vorinostat	HDAC inhibitor	Pro-Apoptosis
dacinostat	HDAC inhibitor	Pro-Apoptosis
tacedinaline	HDAC inhibitor	Pro-Apoptosis
NSC-3852	HDAC inhibitor	Pro-Apoptosis
sodium-butyrate	HDAC inhibitor	Pro-Apoptosis
scriptaid	HDAC inhibitor	Pro-Apoptosis
R306465	HDAC inhibitor	Pro-Apoptosis
chidamide	HDAC inhibitor	Pro-Apoptosis
entinostat	HDAC inhibitor	Pro-Apoptosis
JNJ-26481585	HDAC inhibitor	Pro-Apoptosis
SB-939	HDAC inhibitor	Pro-Apoptosis
AR-42	HDAC inhibitor	Pro-Apoptosis
trichostatin-a	HDAC inhibitor	Pro-Apoptosis
givinostat	HDAC inhibitor	Pro-Apoptosis
pyroxamide	HDAC inhibitor	Pro-Apoptosis
romidepsin	HDAC inhibitor	Pro-Apoptosis
nexturastat-a	HDAC inhibitor	Pro-Apoptosis
PCI-24781	HDAC inhibitor	Pro-Apoptosis
resminostat	HDAC inhibitor	Pro-Apoptosis
M-344	HDAC inhibitor	Pro-Apoptosis
mocetinostat	HDAC inhibitor	Pro-Apoptosis
RG2833	HDAC inhibitor	Pro-Apoptosis
belinostat	HDAC inhibitor	Pro-Apoptosis
ACY-1215	HDAC inhibitor	Pro-Apoptosis
panobinostat	HDAC inhibitor	Pro-Apoptosis
JK-184	hedgehog pathway inhibitor	Pro-Apoptosis
FH1	hepatocyte function enhancer	Anti-Apoptosis
FPH1-(BRD-6125)	hepatocyte function enhancer	Anti-Apoptosis
EMD-1214063	hepatocyte growth factor receptor inhibitor	Growth Factor Inhibitors
N-alpha-Methylhistamine-dihydrochloride	histamine receptor agonist	Inflammatory/Immune
alpha-methylhistamine-dihydrobromide-(S)-(+)	histamine receptor agonist	Inflammatory/Immune
histamine	histamine receptor agonist	Inflammatory/Immune
dimaprit	histamine receptor agonist	Inflammatory/Immune
betazole	histamine receptor agonist	Inflammatory/Immune
clofedanol	histamine receptor antagonist	Inflammatory/Immune
levomequitazine	histamine receptor antagonist	Inflammatory/Immune
terfenadine	histamine receptor antagonist	Inflammatory/Immune
trimethobenzamide	histamine receptor antagonist	Inflammatory/Immune
BF2.649	histamine receptor antagonist	Inflammatory/Immune
dexchlorpheniramine	histamine receptor antagonist	Inflammatory/Immune
chlorphenamine	histamine receptor antagonist	Inflammatory/Immune
cimetidine	histamine receptor antagonist	Inflammatory/Immune
bavisant	histamine receptor antagonist	Inflammatory/Immune
tecastemizole	histamine receptor antagonist	Inflammatory/Immune
ebastine	histamine receptor antagonist	Inflammatory/Immune
deptropine	histamine receptor antagonist	Inflammatory/Immune
tripelennamine	histamine receptor antagonist	Inflammatory/Immune
buclizine	histamine receptor antagonist	Inflammatory/Immune
cetirizine	histamine receptor antagonist	Inflammatory/Immune
levocabastine	histamine receptor antagonist	Inflammatory/Immune
doxepin	histamine receptor antagonist	Inflammatory/Immune
mizolastine	histamine receptor antagonist	Inflammatory/Immune
tiotidine	histamine receptor antagonist	Inflammatory/Immune
DPPE	histamine receptor antagonist	Inflammatory/Immune
oxatomide	histamine receptor antagonist	Inflammatory/Immune
diphenhydramine	histamine receptor antagonist	Inflammatory/Immune
chloropyramine	histamine receptor antagonist	Inflammatory/Immune
levocetirizine	histamine receptor antagonist	Inflammatory/Immune
azacyclonol	histamine receptor antagonist	Inflammatory/Immune
bilastine	histamine receptor antagonist	Inflammatory/Immune
chlorcyclizine	histamine receptor antagonist	Inflammatory/Immune
methapyrilene	histamine receptor antagonist	Inflammatory/Immune
alcaftadine	histamine receptor antagonist	Inflammatory/Immune
ranitidine	histamine receptor antagonist	Inflammatory/Immune
rupatadine	histamine receptor antagonist, platelet activating factor receptor antagonist	Inflammatory/Immune
amlexanox	histamine receptor modulator	Inflammatory/Immune
tazemetostat	histone lysine methyltransferase inhibitor	Histone/Methylation Inhibitor
UNC0737	histone lysine methyltransferase inhibitor	Histone/Methylation Inhibitor
EPZ005687	histone lysine methyltransferase inhibitor	Histone/Methylation Inhibitor
UNC0646	histone lysine methyltransferase inhibitor	Histone/Methylation Inhibitor
BIX-01294	histone lysine methyltransferase inhibitor	Histone/Methylation Inhibitor
3-deazaneplanocin-A	histone lysine methyltransferase inhibitor	Histone/Methylation Inhibitor
GSK2816126	histone lysine methyltransferase inhibitor	Histone/Methylation Inhibitor
EPZ004777	histone lysine methyltransferase inhibitor	Histone/Methylation Inhibitor
UNC0631	histone lysine methyltransferase inhibitor	Histone/Methylation Inhibitor
ryuvidine	histone lysine methyltransferase inhibitor	Histone/Methylation Inhibitor
EPZ-5676	histone lysine methyltransferase inhibitor	Histone/Methylation Inhibitor
UNC0638	histone lysine methyltransferase inhibitor	Histone/Methylation Inhibitor
A-366	histone lysine methyltransferase inhibitor	Histone/Methylation Inhibitor
SGC-0946	histone lysine methyltransferase inhibitor	Histone/Methylation Inhibitor
BMS-626529	HIV attachment inhibitor	Viral Replication Inhibitor
elvitegravir	HIV integrase inhibitor	Viral Replication Inhibitor
dolutegravir	HIV integrase inhibitor	Viral Replication Inhibitor
amprenavir	HIV protease inhibitor	Protein Degradation Inhibitors
saquinavir	HIV protease inhibitor	Protein Degradation Inhibitors
atazanavir	HIV protease inhibitor	Protein Degradation Inhibitors
fosamprenavir	HIV protease inhibitor	Protein Degradation Inhibitors
darunavir	HIV protease inhibitor	Protein Degradation Inhibitors
pravastatin	HMGCR inhibitor	Protein Metabolism Inhibitor
fluvastatin	HMGCR inhibitor	Protein Metabolism Inhibitor
atorvastatin	HMGCR inhibitor	Protein Metabolism Inhibitor
AT13387	HSP antagonist	Chaperone Inhibitors
AEG3482	HSP inducer	Chaperone Activators
KW-2478	HSP inhibitor	Chaperone Inhibitors
alvespimycin	HSP inhibitor	Chaperone Inhibitors
pifithrin-mu	HSP inhibitor	Chaperone Inhibitors
PU-H71	HSP inhibitor	Chaperone Inhibitors
gedunin	HSP inhibitor	Chaperone Inhibitors
ganetespib	HSP inhibitor	Chaperone Inhibitors
BIIB021	HSP inhibitor	Chaperone Inhibitors
VER-49009	HSP inhibitor	Chaperone Inhibitors
SNX-2112	HSP inhibitor	Chaperone Inhibitors
NKP-1339	HSP inhibitor	Chaperone Inhibitors
CCT018159	HSP inhibitor	Chaperone Inhibitors
NMS-E973	HSP inhibitor	Chaperone Inhibitors
NVP-AUY922	HSP inhibitor	Chaperone Inhibitors
XL888	HSP inhibitor	Chaperone Inhibitors
phenytoin	hydantoin antiepileptic	Ion Channel Regulation
ethotoin	hydantoin antiepileptic	Ion Channel Regulation
nitisinone	hydroxyphenylpyruvate dioxygenase inhibitor	Protein Metabolism Inhibitor
BL-5583	hypercalcaemic agent	Other
IOX2	hypoxia inducible factor inhibitor	Angiogenesis Inhibitor
BAY-87-2243	hypoxia inducible factor inhibitor	Angiogenesis Inhibitor
daprodustat	hypoxia inducible factor inhibitor	Angiogenesis Inhibitor
2-methoxyestradiol	hypoxia inducible factor inhibitor	Angiogenesis Inhibitor
NPC-15199	ICAM1 antagonist	Inflammatory/Immune
polydatin	ICAM1 expression inhibitor	Inflammatory/Immune
BMS-754807	IGF-1 inhibitor	DNA Replication Inhibitor
PQ-401	IGF-1 inhibitor	DNA Replication Inhibitor
hypoestoxide	IKK inhibitor	Pro-Apoptosis
BMS-345541	IKK inhibitor	Pro-Apoptosis
IKK-16	IKK inhibitor	Pro-Apoptosis
TPCA-1	IKK inhibitor	Pro-Apoptosis
IKK-2-inhibitor-V	IKK inhibitor, NFkB pathway inhibitor	Pro-Apoptosis
moxonidine	imidazoline receptor agonist	Neurotransmitter Inhibitor
RS-45041-190	imidazoline receptor agonist	Neurotransmitter Inhibitor
KU14R	imidazoline receptor antagonist	Neurotransmitter Inhibitor
BU226	imidazoline receptor ligand	Neurotransmitter Inhibitor
diphencyprone	immunostimulant	Inflammatory/Immune
procodazole	immunostimulant	Inflammatory/Immune
metenkephalin	immunostimulant	Inflammatory/Immune
lobenzarit	immunosuppressant	Inflammatory/Immune
nuclomedone	immunosuppressant	Inflammatory/Immune
bucillamine	immunosuppressant	Inflammatory/Immune
mizoribine	immunosuppressant, inosine monophosphate dehydrogenase inhibitor	Inflammatory/Immune
mercaptopurine	immunosuppressant, protein synthesis inhibitor, purine antagonist	Inflammatory/Immune
IDO5L	indoleamine 2,3-dioxygenase inhibitor	Inflammatory/Immune
merimepodib	inosine monophosphate dehydrogenase inhibitor	Inflammatory/Immune
AVN-944	inosine monophosphate dehydrogenase inhibitor	Inflammatory/Immune
AG-1024	insulin growth factor receptor inhibitor	Growth Factor Inhibitors
TAK-875	insulin secretagogue	Sugar Metabolism Inhibitor
repaglinide	insulin secretagogue	Sugar Metabolism Inhibitor
metformin	insulin sensitizer	Sugar Metabolism Inhibitor
troglitazone	insulin sensitizer, PPAR receptor agonist	Sugar Metabolism Inhibitor
pioglitazone	insulin sensitizer, PPAR receptor agonist	Sugar Metabolism Inhibitor
CT-7758	integrin antagonist	Inflammatory/Immune
CT-7758	integrin antagonist	Inflammatory/Immune
SB-683698	integrin antagonist	Inflammatory/Immune
SB-683698	integrin antagonist	Inflammatory/Immune
GR-144053	integrin antagonist	Inflammatory/Immune
GR-144053	integrin antagonist	Inflammatory/Immune
firategrast	integrin antagonist	Inflammatory/Immune
firategrast	integrin antagonist	Inflammatory/Immune
ATN-161	integrin antagonist	Inflammatory/Immune
ATN-161	integrin antagonist	Inflammatory/Immune
tilorone	interferon inducer	Inflammatory/Immune
bergenin	interleukin inhibitor	Inflammatory/Immune
diacerein	interleukin inhibitor	Inflammatory/Immune
lisofylline	interleukin receptor antagonist, STAT inhibitor	Inflammatory/Immune
STA-5326	interleukin synthesis inhibitor	Inflammatory/Immune
senicapoc	intermediate conductance potassium channel blocker	Ion Channel Regulation
diethyltoluamide	ionotropic receptor IR40a activator	Ion Channel Regulation
BMY-45778	IP1 prostacyclin receptor agonist	G-Coupled Receptor Regulator
enasidenib	isocitrate dehydrogenase inhibitor	Energy Metabolism Inhibitor
AGI-6780	isocitrate dehydrogenase inhibitor	Energy Metabolism Inhibitor
peficitinib	JAK inhibitor	Inflammatory/Immune
TG-101209	JAK inhibitor	Inflammatory/Immune
AZD1480	JAK inhibitor	Inflammatory/Immune
ruxolitinib	JAK inhibitor	Inflammatory/Immune
NVP-BSK805	JAK inhibitor	Inflammatory/Immune
LY2784544	JAK inhibitor	Inflammatory/Immune
baricitinib	JAK inhibitor	Inflammatory/Immune
atiprimod	JAK inhibitor, STAT inhibitor	Inflammatory/Immune
PRT062070	JAK inhibitor, syk inhibitor	Inflammatory/Immune
CC-930	JNK inhibitor	Pro-Apoptosis
BI-78D3	JNK inhibitor	Pro-Apoptosis
SU3327	JNK inhibitor	Pro-Apoptosis
K-Ras(G12C)-inhibitor-6	K-ras inhibitor	Pro-Apoptosis
kainic-acid	kainate receptor agonist	Neurotransmitter Inhibitor
minoxidil	KATP activator, Kir6 channel (KATP) activator, vasodilator	Ion Channel Regulation
ispinesib	kinesin inhibitor	Cytoskeleton Organization Inhibitor
monastrol	kinesin inhibitor	Cytoskeleton Organization Inhibitor
filanesib	kinesin inhibitor, kinesin-like spindle protein inhibitor	Cytoskeleton Organization Inhibitor
litronesib	kinesin-like spindle protein inhibitor	Cytoskeleton Organization Inhibitor
SB-743921	kinesin-like spindle protein inhibitor	Cytoskeleton Organization Inhibitor
K-858	kinesin-like spindle protein inhibitor	Cytoskeleton Organization Inhibitor
ZM-226600	Kir6 channel (KATP) activator	Ion Channel Regulation
vatalanib	KIT inhibitor, PDGFR tyrosine kinase receptor inhibitor, VEGFR inhibitor	Pro-Apoptosis
KI-8751	KIT inhibitor, PDGFR tyrosine kinase receptor inhibitor, VEGFR inhibitor	Pro-Apoptosis
OSI-930	KIT inhibitor, VEGFR inhibitor	Pro-Apoptosis
BAY-K-8644-(+/-)	L-type calcium channel activator	Ion Channel Regulation
gallopamil	L-type calcium channel blocker	Ion Channel Regulation
UNC1215	L3MBTL antagonist	Histone/Methylation Inhibitor
UNC669	L3MBTL antagonist	Histone/Methylation Inhibitor
bisacodyl	laxative	Other
dantron	laxative	Other
berberine	LDL receptor activator	Lipid Metabolism Activator
LY255283	leukotriene receptor antagonist	Inflammatory/Immune
pranlukast	leukotriene receptor antagonist	Inflammatory/Immune
cinalukast	leukotriene receptor antagonist	Inflammatory/Immune
LY223982	leukotriene receptor antagonist	Inflammatory/Immune
tomelukast	leukotriene receptor antagonist	Inflammatory/Immune
ibudilast	leukotriene receptor antagonist, phosphodiesterase inhibitor	Inflammatory/Immune
quiflapon	leukotriene synthesis inhibitor	Inflammatory/Immune
orlistat	lipase inhibitor	Lipid Metabolism Inhibitor
schisandrol-b	lipid peroxidase inhibitor	Lipid Metabolism Inhibitor
tetradecylthioacetic-acid	lipid peroxidase inhibitor	Lipid Metabolism Inhibitor
ibrolipim	lipoprotein lipase activator	Lipid Metabolism Activator
AM-24	lipoxygenase inhibitor	Inflammatory/Immune
diethylcarbamazine	lipoxygenase inhibitor	Inflammatory/Immune
2-TEDC	lipoxygenase inhibitor	Inflammatory/Immune
propoxycaine	local anesthetic	Inflammatory/Immune
polidocanol	local anesthetic	Inflammatory/Immune
oxethazaine	local anesthetic	Inflammatory/Immune
prilocaine	local anesthetic	Inflammatory/Immune
articaine	local anesthetic	Inflammatory/Immune
diperodon	local anesthetic	Inflammatory/Immune
amylene-hydrate	local anesthetic	Inflammatory/Immune
butacaine	local anesthetic	Inflammatory/Immune
benzonatate	local anesthetic	Inflammatory/Immune
meprylcaine	local anesthetic	Inflammatory/Immune
KI-16425	lysophosphatidic acid receptor antagonist	Anti-Apoptosis
4-iodo-6-phenylpyrimidine	macrophage migration inhibiting factor inhibitor	Inflammatory/Immune
mepazine	MALT1 inhibitor (JH)	Inflammatory/Immune
kifunensine	mannosidase inhibitor	Protein Metabolism Inhibitor
BVD-523	MAP kinase inhibitor	Pro-Apoptosis
PD-198306	MAP kinase inhibitor, MEK inhibitor	Pro-Apoptosis
CID-5458317	MAP kinase phosphatase inhibitor	Pro-Apoptosis
OTS167	maternal embryonic leucine zipper kinase inhibitor	Pro-Apoptosis
marimastat	matrix metalloprotease inhibitor	Angiogenesis Inhibitor
NSC-405020	matrix metalloprotease inhibitor	Angiogenesis Inhibitor
maltobionic-acid	matrix metalloprotease inhibitor	Angiogenesis Inhibitor
batimastat	matrix metalloprotease inhibitor	Angiogenesis Inhibitor
ilomastat	matrix metalloprotease inhibitor	Angiogenesis Inhibitor
apratastat	matrix metalloprotease inhibitor, tumor necrosis factor production inhibitor	Inflammatory/Immune
nutlin-3	MDM inhibitor	Pro-Apoptosis
RITA	MDM inhibitor	Pro-Apoptosis
idasanutlin	MDM inhibitor	Pro-Apoptosis
serdemetan	MDM inhibitor	Pro-Apoptosis
AMG-232	MDM inhibitor	Pro-Apoptosis
acitazanolast	mediator release inhibitor	Inflammatory/Immune
ER-27319	mediator release inhibitor, SYK inhibitor	Pro-Apoptosis
U-0126	MEK inhibitor	Pro-Apoptosis
PD-184352	MEK inhibitor	Pro-Apoptosis
MEK162	MEK inhibitor	Pro-Apoptosis
selumetinib	MEK inhibitor	Pro-Apoptosis
arctigenin	MEK inhibitor	Pro-Apoptosis
nobiletin	MEK inhibitor	Pro-Apoptosis
arbutin	melanin inhibitor	Oxidative Stress Inhibitors
bremelanotide	melanocortin receptor agonist	Inflammatory/Immune
GR-135531	melatonin receptor agonist	Neurotransmitter Inhibitor
2-phenylmelatonin	melatonin receptor agonist	Neurotransmitter Inhibitor
6-chloromelatonin	melatonin receptor agonist	Neurotransmitter Inhibitor
2-iodomelatonin	melatonin receptor agonist	Neurotransmitter Inhibitor
ramelteon	melatonin receptor agonist	Neurotransmitter Inhibitor
N-acetyltryptamine	melatonin receptor agonist	Neurotransmitter Inhibitor
4-P-PDOT	melatonin receptor antagonist	Inflammatory/Immune
nonoxynol-9	membrane integrity inhibitor	Cytoskeleton Organization Inhibitor
miltefosine	membrane integrity inhibitor	Cytoskeleton Organization Inhibitor
octenidine	membrane integrity inhibitor	Cytoskeleton Organization Inhibitor
ciclopirox	membrane integrity inhibitor	Cytoskeleton Organization Inhibitor
sevoflurane	membrane integrity inhibitor	Cytoskeleton Organization Inhibitor
methoxyflurane	membrane permeability inhibitor	Ion Channel Regulation
enflurane	membrane permeability inhibitor	Ion Channel Regulation
UNC2250	MER tyrosine kinase inhibitor	Growth Factor Inhibitors
NVP-BVU972	MET inhibitor	Pro-Apoptosis
LY2801653	MET inhibitor	Pro-Apoptosis
AMG-337	MET inhibitor	Pro-Apoptosis
doxycycline	metalloproteinase inhibitor	Inflammatory/Immune
cipemastat	metalloproteinase inhibitor	Inflammatory/Immune
cyanocobalamin	methylmalonyl CoA mutase stimulant, vitamin B	Protein Metabolism Inhibitor
lomitapide	microsomal trigylceride transfer protein inhibitor	Lipid Metabolism Inhibitor
cabazitaxel	microtubule inhibitor	Cytoskeleton Organization Inhibitor
D-64131	microtubule inhibitor	Cytoskeleton Organization Inhibitor
colchicine	microtubule inhibitor	Cytoskeleton Organization Inhibitor
triclabendazole	microtubule inhibitor	Cytoskeleton Organization Inhibitor
vinflunine	microtubule inhibitor	Cytoskeleton Organization Inhibitor
10-deacetylbaccatin	microtubule inhibitor	Cytoskeleton Organization Inhibitor
podophyllotoxin	microtubule inhibitor, tubulin polymerization inhibitor	Cytoskeleton Organization Inhibitor
carbendazim	microtubule inhibitor, tubulin polymerization inhibitor	Cytoskeleton Organization Inhibitor
vinblastine	microtubule inhibitor, tubulin polymerization inhibitor	Cytoskeleton Organization Inhibitor
ixabepilone	microtubule stabilizing agent	Cytoskeleton Organization Inhibitor
epothilone-a	microtubule stabilizing agent	Cytoskeleton Organization Inhibitor
epothilone-d	microtubule stabilizing agent, tubulin polymerization inhibitor	Cytoskeleton Organization Inhibitor
epothilone-b	microtubule stabilizing agent, tubulin polymerization inhibitor	Cytoskeleton Organization Inhibitor
corticosterone	mineralocorticoid receptor agonist	Ion Channel Regulation
desoxycortone	mineralocorticoid receptor agonist	Ion Channel Regulation
spironolactone	mineralocorticoid receptor antagonist	Ion Channel Regulation
potassium-canrenoate	mineralocorticoid receptor antagonist	Ion Channel Regulation
atovaquone	mitochondrial electron transport inhibitor	Oxidative Stress Activator
MPI-0479605	mitotic kinase inhibitor	DNA Replication Inhibitor
JZL-184	monoacylglucerol lipase inhibitor	Lipid Metabolism Activator
iproniazid	monoamine oxidase inhibitor	Neurotransmitter Enhancer
milacemide	monoamine oxidase inhibitor	Neurotransmitter Enhancer
phenelzine	monoamine oxidase inhibitor	Neurotransmitter Enhancer
hymecromone	monoamine oxidase inhibitor	Neurotransmitter Enhancer
tranylcypromine	monoamine oxidase inhibitor	Neurotransmitter Enhancer
clorgiline	monoamine oxidase inhibitor	Neurotransmitter Enhancer
eprobemide	monoamine oxidase inhibitor	Neurotransmitter Enhancer
pargyline	monoamine oxidase inhibitor	Neurotransmitter Enhancer
AZ3146	monopolar spindle 1 kinase inhibitor	Pro-Apoptosis
camicinal	motilin receptor agonist	Other
dofequidar	MRP inhibitor, P glycoprotein inhibitor	Transport Inhibitor
dofequidar	MRP inhibitor, P glycoprotein inhibitor	Pro-Apoptosis
crizotinib-(S)	MTH1 inhibitor	Oxidative Stress Activator
salirasib	mTOR inhibitor	Pro-Apoptosis
AZD2014	mTOR inhibitor	Pro-Apoptosis
WYE-125132	mTOR inhibitor	Pro-Apoptosis
torin-1	mTOR inhibitor	Pro-Apoptosis
AZD8055	mTOR inhibitor	Pro-Apoptosis
ku-0063794	mTOR inhibitor	Pro-Apoptosis
XL388	mTOR inhibitor	Pro-Apoptosis
temsirolimus	mTOR inhibitor	Pro-Apoptosis
MLN0128	mTOR inhibitor	Pro-Apoptosis
torin-2	mTOR inhibitor	Pro-Apoptosis
GSK2126458	mTOR inhibitor, PI3K inhibitor	Pro-Apoptosis
PF-05212384	mTOR inhibitor, PI3K inhibitor	Pro-Apoptosis
PF-04691502	mTOR inhibitor, PI3K inhibitor	Pro-Apoptosis
SB-2343	mTOR inhibitor, PI3K inhibitor	Pro-Apoptosis
PKI-179	mTOR inhibitor, PI3K inhibitor	Pro-Apoptosis
GDC-0980	mTOR inhibitor, PI3K inhibitor	Pro-Apoptosis
PI-103	mTOR inhibitor, PI3K inhibitor	Pro-Apoptosis
tasuldine	mucolytic agent	Other
fudosteine	mucolytic agent	Other
acetylcysteine	mucolytic agent	Other
erdosteine	mucolytic agent	Other
eprazinone	mucolytic agent	Other
sofalcone	mucus protecting agent	Other
teprenone	mucus protecting agent	Other
metaxalone	muscle relaxant	Other
alverine	muscle relaxant	Other
pridinol	muscle relaxant	Other
phenprobamate	muscle relaxant	Other
alcuronium	muscle relaxant	Other
chlorphensin-carbamate	muscle relaxant	Other
ethionamide	mycolic synthesis inhibitor	Lipid Metabolism Activator
zoxazolamine	myorelaxant	Other
Z160	N-type calcium channel blocker	Ion Channel Regulation
deslanoside	Na/K-ATPase inhibitor	Ion Channel Regulation
niacin	NAD precursor, vitamin B	Oxidative Stress Inhibitors
dicoumarol	NADPH inhibitor	Oxidative Stress Inhibitors
apocynin	NADPH oxidase inhibitor	Oxidative Stress Inhibitors
STF-118804	NAMPT inhibitor	Pro-Apoptosis
pevonedistat	nedd activating enzyme inhibitor	Protein Degradation Inhibitors
selamectin	nematocide	Other
KBG	neprilysin inhibitor	Inflammatory/Immune
sacubitril	neprilysin inhibitor	Inflammatory/Immune
oseltamivir-phosphate	neuraminidase inhibitor	Sugar Metabolism Inhibitor
zanamivir	neuraminidase inhibitor	Sugar Metabolism Inhibitor
maropitant	neurokinin receptor antagonist	G-Coupled Receptor Regulator
pipecuronium	neuromuscular blocker	Neurotransmitter Inhibitor
NTNCB	neuropeptide receptor antagonist	Neurotransmitter Inhibitor
L-152804	neuropeptide receptor antagonist	Neurotransmitter Inhibitor
PD-160170	neuropeptide receptor antagonist	Neurotransmitter Inhibitor
almitrine	neurotransmitter agonist	Neurotransmitter Inhibitor
inosine	neurotrophic agent	Inflammatory/Immune
BAY-11-7085	NFkB pathway inhibitor	Pro-Apoptosis
BAY-11-7082	NFkB pathway inhibitor	Pro-Apoptosis
sasapyrine	NFkB pathway inhibitor	Pro-Apoptosis
parthenolide-(-)	NFkB pathway inhibitor	Pro-Apoptosis
bicyclol	NFkB pathway inhibitor	Pro-Apoptosis
erythromycin	NFkB pathway inhibitor	Pro-Apoptosis
parthenolide-(alternate-stereo)	NFkB pathway inhibitor	Pro-Apoptosis
bindarit	NFkB pathway inhibitor	Pro-Apoptosis
cepharanthine	NFkB pathway inhibitor	Pro-Apoptosis
EVP4593	NFkB pathway inhibitor	Pro-Apoptosis
tyloxapol	NFkB pathway inhibitor	Pro-Apoptosis
parthenolide	NFkB pathway inhibitor	Pro-Apoptosis
bortezomib	NFkB pathway inhibitor, proteasome inhibitor	Protein Degradation Inhibitors
FK-866	niacinamide phosphoribosyltransferase inhibitor	Sugar Metabolism Inhibitor
pyrantel	nicotinic receptor agonist	Neurotransmitter Inhibitor
betaine	nitric oxide donor	Ion Channel Regulation
linsidomine	nitric oxide donor	Ion Channel Regulation
SNAP	nitric oxide donor	Ion Channel Regulation
nicorandil	nitric oxide donor, potassium channel activator	Ion Channel Regulation
RTA-408	nitric oxide production inhibitor	Pro-Apoptosis
S-Nitrosoglutathione	nitric oxide stimulant	Anti-Apoptosis
isosorbide-mononitrate	nitric oxide stimulant	Anti-Apoptosis
agmatine	nitric oxide synthase inhibitor	Inflammatory/Immune
EIT-hydrobromide	nitric oxide synthase inhibitor	Inflammatory/Immune
7-nitroindazole	nitric oxide synthase inhibitor	Inflammatory/Immune
asymmetrical-dimethylarginine	nitric oxide synthase inhibitor	Inflammatory/Immune
1400W	nitric oxide synthase inhibitor	Inflammatory/Immune
diphenyleneiodonium	nitric oxide synthase inhibitor	Inflammatory/Immune
2-iminobiotin	nitric oxide synthase inhibitor	Inflammatory/Immune
BAN-ORL-24	nociceptin/orphanin FQ receptor antagonist	G-Coupled Receptor Regulator
ML130	NOD1 inhibitor	Inflammatory/Immune
ML130	NOD1 inhibitor	Inflammatory/Immune
nevirapine	non-nucleoside reverse transcriptase inhibitor	Viral Replication Inhibitor
dapivirine	non-nucleoside reverse transcriptase inhibitor	Viral Replication Inhibitor
etravirine	non-nucleoside reverse transcriptase inhibitor	Viral Replication Inhibitor
meclofenoxate	nootropic agent	Neurotransmitter Inhibitor
phenylpiracetam	noradrenaline uptake inhibitor	Neurotransmitter Inhibitor
amitriptyline	norepinephrine inhibitor, norepinephrine reuptake inhibitor, serotonin receptor antagonist, serotonin-norepinephrine reuptake inhibitor (SNRI)	Neurotransmitter Inhibitor
dibenzepine	norepinephrine reputake inhibitor	Neurotransmitter Inhibitor
tramadol	norepinephrine reputake inhibitor, opioid receptor agonist, serotonin reuptake inhibitor	Neurotransmitter Inhibitor
trimipramine	norepinephrine reputake inhibitor, tricyclic antidepressant	Neurotransmitter Inhibitor
maprotiline	norepinephrine reputake inhibitor, tricyclic antidepressant	Neurotransmitter Inhibitor
nisoxetine	norepinephrine reuptake inhibitor	Neurotransmitter Inhibitor
duloxetine	norepinephrine reuptake inhibitor, serotonin-norepinephrine reuptake inhibitor (SNRI)	Neurotransmitter Inhibitor
dosulepin	norepinephrine reuptake inhibitor, serotonin-norepinephrine reuptake inhibitor (SNRI), tricyclic antidepressant	Neurotransmitter Inhibitor
atomoxetine	norepinephrine transporter inhibitor	Neurotransmitter Inhibitor
PSB-06126	NTPDase inhibitor	Energy Metabolism Inhibitor
bardoxolone	nuclear factor erythroid derived, like (NRF2) activator	Oxidative Stress Inhibitors
ursodiol	nuclear factor erythroid derived, like (NRF2) activator	Oxidative Stress Inhibitors
dimethyl-fumarate	nuclear factor erythroid derived, like (NRF2) activator	Oxidative Stress Inhibitors
bardoxolone-methyl	nuclear factor erythroid derived, like (NRF2) activator	Oxidative Stress Inhibitors
oltipraz	nuclear factor erythroid derived, like (NRF2) activator	Oxidative Stress Inhibitors
emtricitabine	nucleoside reverse transcriptase inhibitor	Viral Replication Inhibitor
tenofovir-disoproxil	nucleoside reverse transcriptase inhibitor	Viral Replication Inhibitor
didanosine	nucleoside reverse transcriptase inhibitor	Viral Replication Inhibitor
zalcitabine	nucleoside reverse transcriptase inhibitor	Viral Replication Inhibitor
dideoxyadenosine	nucleoside reverse transcriptase inhibitor	Viral Replication Inhibitor
alpha-linolenic-acid	omega 3 fatty acid stimulant	Lipid Metabolism Inhibitor
doconexent-ethyl-ester	omega 3 fatty acid stimulant	Lipid Metabolism Inhibitor
loperamide	opioid receptor agonist	Neurotransmitter Inhibitor
salvinorin-a	opioid receptor agonist	Neurotransmitter Inhibitor
meptazinol	opioid receptor agonist	Neurotransmitter Inhibitor
dalargin	opioid receptor agonist	Neurotransmitter Inhibitor
FK-33-824	opioid receptor agonist	Neurotransmitter Inhibitor
NNC-63-0532	opioid receptor agonist	Neurotransmitter Inhibitor
trimebutine	opioid receptor agonist	Neurotransmitter Inhibitor
ADL5859	opioid receptor agonist	Neurotransmitter Inhibitor
N-MPPP	opioid receptor agonist	Neurotransmitter Inhibitor
TRV130	opioid receptor agonist	Neurotransmitter Inhibitor
nalbuphine	opioid receptor agonist, opioid receptor antagonist	Neurotransmitter Inhibitor
naloxegol	opioid receptor antagonist	Neurotransmitter Inhibitor
naloxone	opioid receptor antagonist	Neurotransmitter Inhibitor
BNTX	opioid receptor antagonist	Neurotransmitter Inhibitor
alvimopan	opioid receptor antagonist	Neurotransmitter Inhibitor
naltriben	opioid receptor antagonist	Neurotransmitter Inhibitor
JDTic	opioid receptor antagonist	Neurotransmitter Inhibitor
nor-Binaltorphimine-dihydrochloride	opioid receptor antagonist	Neurotransmitter Inhibitor
JTC-801	opioid receptor antagonist	Neurotransmitter Inhibitor
SDM25N	opioid receptor antagonist	Neurotransmitter Inhibitor
sufentanil	opioid receptor modulator	Neurotransmitter Inhibitor
SB-408124	orexin receptor antagonist	Neurotransmitter Inhibitor
MK-6096	orexin receptor antagonist	Neurotransmitter Inhibitor
suvorexant	orexin receptor antagonist	Neurotransmitter Inhibitor
almorexant	orexin receptor antagonist	Neurotransmitter Inhibitor
eflornithine	ornithine decarboxylase inhibitor	Pro-Apoptosis
lacitol	osmosis stimulant	Other
nanchangmycin	other antibiotic	Pro-Apoptosis
triclocarban	other antibiotic	Pro-Apoptosis
salicylanilide	other antibiotic	Pro-Apoptosis
morinidazole	other antibiotic	Pro-Apoptosis
crystal-violet	other antibiotic	Pro-Apoptosis
thiomersal	other antibiotic	Pro-Apoptosis
sulbentine	other antifungal	Other
sclareolide	other antifungal	Other
phenylmercuric-acetate	other antifungal	Other
inimur	other antifungal	Other
haloprogin	other antifungal	Other
elesclomol	oxidative stress inducer	Oxidative Stress Activator
U-18666A	oxidosqualene cyclase inhibitor	Lipid Metabolism Inhibitor
L-368899	oxytocin receptor antagonist	Neurotransmitter Inhibitor
cinchonidine	P glycoprotein inhibitor	Energy Metabolism Inhibitor
SC-144	P glycoprotein inhibitor	Energy Metabolism Inhibitor
KF-38789	P selectin inhibitor	Angiogenesis Inhibitor
PF-03758309	p21 activated kinase inhibitor	Pro-Apoptosis
SB-242235	p38 MAPK inhibitor	Inflammatory/Immune
SB-203580	p38 MAPK inhibitor	Inflammatory/Immune
SD-169	p38 MAPK inhibitor	Inflammatory/Immune
JX-401	p38 MAPK inhibitor	Inflammatory/Immune
CMPD-1	p38 MAPK inhibitor	Inflammatory/Immune
doramapimod	p38 MAPK inhibitor	Inflammatory/Immune
PH-797804	p38 MAPK inhibitor	Inflammatory/Immune
skepinone-l	p38 MAPK inhibitor	Inflammatory/Immune
talmapimod	p38 MAPK inhibitor	Inflammatory/Immune
EO-1428	p38 MAPK inhibitor	Inflammatory/Immune
SB-239063	p38 MAPK inhibitor	Inflammatory/Immune
NSC-319726	p53 activator	Anti-Apoptosis
sulfapyridine	PABA antagonist	DNA Replication Inhibitor
sulfametopyrazine	PABA antagonist	DNA Replication Inhibitor
sulfamethoxazole	PABA antagonist	DNA Replication Inhibitor
betamipron	panipenem uptake inhibitor	Other
3-amino-benzamide	PARP inhibitor	Pro-Apoptosis
ME0328	PARP inhibitor	Pro-Apoptosis
niraparib	PARP inhibitor	Pro-Apoptosis
NU-1025	PARP inhibitor	Pro-Apoptosis
talazoparib	PARP inhibitor	Pro-Apoptosis
AZD2461	PARP inhibitor	Pro-Apoptosis
iniparib	PARP inhibitor	Pro-Apoptosis
UPF-1069	PARP inhibitor	Pro-Apoptosis
PJ-34	PARP inhibitor	Pro-Apoptosis
crenolanib	PDGFR tyrosine kinase receptor inhibitor	Growth Factor Inhibitors
axitinib	PDGFR tyrosine kinase receptor inhibitor, VEGFR inhibitor	Growth Factor Inhibitors
linifanib	PDGFR tyrosine kinase receptor inhibitor, VEGFR inhibitor	Growth Factor Inhibitors
amoxicillin	penicillin binding protein inhibitor	Cytoskeleton Organization Inhibitor
tosedostat	peptidase inhibitor	Protein Metabolism Inhibitor
GSK2656157	PERK inhibitor	Protein Synthesis Activator
cabaletta	pharmacological chaperone	Other
sevelamer	phosphate antagonist	Ion Channel Regulation
alexidine	phosphatidylglycerophosphatase inhibitor	Lipid Metabolism Inhibitor
amrinone	phosphodiesterase inhibitor	Pro-Apoptosis
theobromine	phosphodiesterase inhibitor	Pro-Apoptosis
MMPX	phosphodiesterase inhibitor	Pro-Apoptosis
enprofylline	phosphodiesterase inhibitor	Pro-Apoptosis
roflumilast	phosphodiesterase inhibitor	Pro-Apoptosis
etazolate	phosphodiesterase inhibitor	Pro-Apoptosis
oglemilast	phosphodiesterase inhibitor	Pro-Apoptosis
enoximone	phosphodiesterase inhibitor	Pro-Apoptosis
papaverine	phosphodiesterase inhibitor	Pro-Apoptosis
Ro-20-1724	phosphodiesterase inhibitor	Pro-Apoptosis
resorcinol	phosphodiesterase inhibitor	Pro-Apoptosis
PF-02545920	phosphodiesterase inhibitor	Pro-Apoptosis
ICI-63197	phosphodiesterase inhibitor	Pro-Apoptosis
pentoxifylline	phosphodiesterase inhibitor	Pro-Apoptosis
vesnarinone	phosphodiesterase inhibitor	Pro-Apoptosis
exisulind	phosphodiesterase inhibitor	Pro-Apoptosis
siguazodan	phosphodiesterase inhibitor	Pro-Apoptosis
piroximone	phosphodiesterase inhibitor	Pro-Apoptosis
cilostamide	phosphodiesterase inhibitor	Pro-Apoptosis
avanafil	phosphodiesterase inhibitor	Pro-Apoptosis
sildenafil	phosphodiesterase inhibitor	Pro-Apoptosis
PF-04447943	phosphodiesterase inhibitor	Pro-Apoptosis
irsogladine	phosphodiesterase inhibitor	Pro-Apoptosis
lirimilast	phosphodiesterase inhibitor	Pro-Apoptosis
MY-5445	phosphodiesterase inhibitor, platelet aggregation inhibitor	Angiogenesis Inhibitor
vinpocetine	phosphodiesterase inhibitor, sodium channel blocker	Ion Channel Regulation
ceramide	phosphoenolpyruvate carboxylase activator, serine/threonine protein phosphatase activator	Sugar Metabolism Activator
niridazole	phosphofructokinase inhibitor	Sugar Metabolism Inhibitor
PFK-015	phosphofructokinase inhibitor	Sugar Metabolism Inhibitor
AR-12	phosphoinositide dependent kinase inhibitor	Pro-Apoptosis
AR-12	phosphoinositide dependent kinase inhibitor	Pro-Apoptosis
o-3M3FBS	phospholipase activator	Lipid Metabolism Activator
VU0155069	phospholipase inhibitor	Lipid Metabolism Inhibitor
edelfosine	phospholipase inhibitor	Lipid Metabolism Inhibitor
halopemide	phospholipase inhibitor	Lipid Metabolism Inhibitor
darapladib	phospholipase inhibitor	Lipid Metabolism Inhibitor
XL-147	PI3K inhibitor	Pro-Apoptosis
CAY10505	PI3K inhibitor	Pro-Apoptosis
buparlisib	PI3K inhibitor	Pro-Apoptosis
TG100-115	PI3K inhibitor	Pro-Apoptosis
idelalisib	PI3K inhibitor	Pro-Apoptosis
copanlisib	PI3K inhibitor	Pro-Apoptosis
taselisib	PI3K inhibitor	Pro-Apoptosis
AZD6482	PI3K inhibitor	Pro-Apoptosis
CZC24832	PI3K inhibitor	Pro-Apoptosis
BGT226	PI3K inhibitor	Pro-Apoptosis
ZSTK-474	PI3K inhibitor	Pro-Apoptosis
YM-201636	PI3K inhibitor	Pro-Apoptosis
CUDC-907	PI3K inhibitor	Pro-Apoptosis
SAR-245409	PI3K inhibitor	Pro-Apoptosis
LY3023414	PI3K inhibitor, mTOR inhibitor	Pro-Apoptosis
GDC-0349	Pim kinase inhibitor	DNA Replication Inhibitor
SMI-4a	Pim kinase inhibitor	DNA Replication Inhibitor
H-89	PKA inhibitor	Lipid Metabolism Inhibitor
ingenol-mebutate	PKC activator	Pro-Apoptosis
enzastaurin	PKC inhibitor	Pro-Apoptosis
ethylenediaminetetraacetic-acid	PKC inhibitor	Pro-Apoptosis
dequalinium	PKC inhibitor	Pro-Apoptosis
bisindolylmaleimide-ix	PKC inhibitor	Pro-Apoptosis
PD-407824	PKC inhibitor	Pro-Apoptosis
corosolic-acid	PKC inhibitor, protein tyrosine kinase inhibitor	Pro-Apoptosis
aminocaproic-acid	plasminogen activator inhibitor	Angiogenesis Inhibitor
foropafant	platelet activating factor receptor antagonist	Angiogenesis Inhibitor
apafant	platelet activating factor receptor antagonist	Angiogenesis Inhibitor
etofylline-clofibrate	platelet aggregation inhibitor	Angiogenesis Inhibitor
BI-2536	PLK inhibitor	Pro-Apoptosis
HMN-214	PLK inhibitor	Pro-Apoptosis
GSK461364	PLK inhibitor	Pro-Apoptosis
NMS-1286937	PLK inhibitor	Pro-Apoptosis
volasertib	PLK inhibitor	Pro-Apoptosis
GW-843682X	PLK inhibitor	Pro-Apoptosis
wnt-c59	porcupine inhibitor	Pro-Apoptosis
LGK-974	porcupine inhibitor	Pro-Apoptosis
IWP-L6	porcupine inhibitor	Pro-Apoptosis
retigabine	potassium channel activator	Ion Channel Regulation
diazoxide	potassium channel activator	Ion Channel Regulation
cloxyquin	potassium channel activator	Ion Channel Regulation
hexachlorophene	potassium channel activator	Ion Channel Regulation
Y-27152	potassium channel activator	Ion Channel Regulation
nibentan	potassium channel blocker	Ion Channel Regulation
dofetilide	potassium channel blocker	Ion Channel Regulation
DPO-1	potassium channel blocker	Ion Channel Regulation
ML133	potassium channel blocker	Ion Channel Regulation
amiodarone	potassium channel blocker	Ion Channel Regulation
linopirdine	potassium channel blocker	Ion Channel Regulation
chromanol-(+/-)	potassium channel blocker	Ion Channel Regulation
E-4031	potassium channel blocker	Ion Channel Regulation
meglitinide	potassium channel blocker	Ion Channel Regulation
ibutilide	potassium channel blocker	Ion Channel Regulation
nifekalant	potassium channel blocker	Ion Channel Regulation
mepivacaine	potassium channel blocker, sodium channel blocker	Ion Channel Regulation
vonoprazan	potassium-competitive acid antagonist	Ion Channel Regulation
elafibranor	PPAR receptor agonist	Lipid Metabolism Inhibitor
efatutazone	PPAR receptor agonist	Lipid Metabolism Inhibitor
bezafibrate	PPAR receptor agonist	Lipid Metabolism Inhibitor
fenofibrate	PPAR receptor agonist	Lipid Metabolism Inhibitor
clofibric-acid	PPAR receptor agonist	Lipid Metabolism Inhibitor
GW-501516	PPAR receptor agonist	Lipid Metabolism Inhibitor
clofibrate	PPAR receptor agonist	Lipid Metabolism Inhibitor
magnolol	PPAR receptor agonist	Lipid Metabolism Inhibitor
L-165041	PPAR receptor agonist	Lipid Metabolism Inhibitor
pirinixic-acid	PPAR receptor agonist	Lipid Metabolism Inhibitor
GW-7647	PPAR receptor agonist	Lipid Metabolism Inhibitor
BADGE	PPAR receptor antagonist	Lipid Metabolism Inhibitor
GSK3787	PPAR receptor antagonist	Lipid Metabolism Inhibitor
GSK-0660	PPAR receptor antagonist	Lipid Metabolism Inhibitor
icaritin	PPAR receptor antagonist	Lipid Metabolism Inhibitor
GW-9662	PPAR receptor antagonist	Lipid Metabolism Inhibitor
mifobate	PPAR receptor antagonist	Lipid Metabolism Inhibitor
cafestol	pregnane X receptor agonist	Other
UK-383367	Procollagen C-Endopeptidase Inhibitors	Protein Metabolism Inhibitor
nomegestrol-acetate	progesterone receptor agonist	Growth Hormone Inhibitor
megestrol-acetate	progesterone receptor agonist	Growth Hormone Inhibitor
hydroxyprogesterone-acetate	progesterone receptor agonist	Growth Hormone Inhibitor
dydrogesterone	progesterone receptor agonist	Growth Hormone Inhibitor
desogestrel	progesterone receptor agonist	Growth Hormone Inhibitor
hydroxyprogesterone	progesterone receptor agonist	Growth Hormone Inhibitor
progesterone	progesterone receptor agonist	Growth Hormone Inhibitor
17-hydroxyprogesterone-caproate	progesterone receptor agonist	Growth Hormone Inhibitor
melengestrol-acetate	progesterone receptor agonist	Growth Hormone Inhibitor
medroxyprogesterone-acetate	progesterone receptor agonist	Growth Hormone Inhibitor
dienogest	progesterone receptor agonist	Growth Hormone Inhibitor
gestrinone	progesterone receptor antagonist	Growth Hormone Inhibitor
ulipristal	progesterone receptor antagonist	Growth Hormone Inhibitor
ethisterone	progestogen hormone	Growth Hormone Inhibitor
deoxycorticosterone-acetate	progestogen hormone	Growth Hormone Inhibitor
noretynodrel	progestogen hormone	Growth Hormone Inhibitor
fenoprofen	prostaglandin inhibitor	Growth Hormone Inhibitor
grapiprant	prostaglandin inhibitor	Growth Hormone Inhibitor
cloprostenol-(+/-)	prostaglandin receptor agonist	Growth Hormone Inhibitor
taprenepag	prostaglandin receptor agonist	Growth Hormone Inhibitor
zomepirac	prostaglandin synthesis inhibitor	Growth Hormone Inhibitor
latanoprost	prostanoid receptor agonist	Inflammatory/Immune
travoprost	prostanoid receptor agonist	Inflammatory/Immune
dihomo-gamma-linolenic-acid	prostanoid receptor agonist	Inflammatory/Immune
AH6809	prostanoid receptor antagonist	Inflammatory/Immune
tromaril	prostanoid receptor antagonist	Inflammatory/Immune
sodium-salicylate	prostanoid receptor antagonist	Inflammatory/Immune
L-798,106	prostanoid receptor antagonist	Inflammatory/Immune
diflunisal	prostanoid receptor antagonist	Inflammatory/Immune
ramatroban	prostanoid receptor antagonist	Inflammatory/Immune
flunixin-meglumin	prostanoid receptor antagonist	Inflammatory/Immune
benzydamine	prostanoid receptor antagonist	Inflammatory/Immune
aloxistatin	protease inhibitor	Protein Metabolism Inhibitor
camostat-mesilate	protease inhibitor	Protein Metabolism Inhibitor
ML161	protease-activated receptor inhibitor	G-Coupled Receptor Regulator
ixazomib	proteasome inhibitor	Protein Degradation Inhibitors
carfilzomib	proteasome inhibitor	Protein Degradation Inhibitors
oprozomib	proteasome inhibitor	Protein Degradation Inhibitors
ixazomib-citrate	proteasome inhibitor	Protein Degradation Inhibitors
delanzomib	proteasome inhibitor	Protein Degradation Inhibitors
ONX-0914	proteasome inhibitor	Protein Degradation Inhibitors
MG-132	proteasome inhibitor	Protein Degradation Inhibitors
SC-10	protein kinase activator	Anti-Apoptosis
daphnetin	protein kinase inhibitor	Pro-Apoptosis
go-6983	protein kinase inhibitor	Pro-Apoptosis
florfenicol	protein synthesis inhibitor	Protein Synthesis Inhibitor
puromycin	protein synthesis inhibitor	Protein Synthesis Inhibitor
methacycline	protein synthesis inhibitor	Protein Synthesis Inhibitor
homoharringtonine	protein synthesis inhibitor	Protein Synthesis Inhibitor
4E1RCat	protein synthesis inhibitor	Protein Synthesis Inhibitor
anguidine	protein synthesis inhibitor	Protein Synthesis Inhibitor
netilmicin	protein synthesis inhibitor	Protein Synthesis Inhibitor
harringtonine	protein synthesis inhibitor	Protein Synthesis Inhibitor
brefeldin-a	protein synthesis inhibitor	Protein Synthesis Inhibitor
chloramphenicol-palmitate	protein synthesis inhibitor	Protein Synthesis Inhibitor
bruceantin	protein synthesis inhibitor	Protein Synthesis Inhibitor
retapamulin	protein synthesis inhibitor	Protein Synthesis Inhibitor
isepamicin	protein synthesis inhibitor	Protein Synthesis Inhibitor
troleandomycin	protein synthesis inhibitor	Protein Synthesis Inhibitor
cycloheximide	protein synthesis inhibitor	Protein Synthesis Inhibitor
emetine	protein synthesis inhibitor	Protein Synthesis Inhibitor
chlortetracycline	protein synthesis inhibitor	Protein Synthesis Inhibitor
nicotinamide	protein synthesis stimulant	Other
malotilate	protein synthesis stimulant	Other
SC-9	protein tyrosine kinase activator	Anti-Apoptosis
AV-412	protein tyrosine kinase inhibitor	Pro-Apoptosis
mubritinib	protein tyrosine kinase inhibitor	Pro-Apoptosis
toceranib	protein tyrosine kinase inhibitor	Pro-Apoptosis
NVP-TAE226	protein tyrosine kinase inhibitor	Pro-Apoptosis
tyrphostin-A9	protein tyrosine kinase inhibitor, tyrosine kinase inhibitor	Pro-Apoptosis
mefexamide	psychoactive drug	Other
haloperidol-decanoate	psychoactive drug	Other
fipexide	psychoactive drug	Other
tioguanine	purine antagonist	DNA Replication Inhibitor
ticlopidine	purinergic receptor antagonist	Neurotransmitter Inhibitor
clopidogrel	purinergic receptor antagonist	Neurotransmitter Inhibitor
ticagrelor	purinergic receptor antagonist	Neurotransmitter Inhibitor
AZD1283	purinergic receptor antagonist	Neurotransmitter Inhibitor
A740003	purinergic receptor antagonist	Neurotransmitter Inhibitor
prasugrel	purinergic receptor antagonist	Neurotransmitter Inhibitor
5-BDBD	purinergic receptor antagonist	Neurotransmitter Inhibitor
CPI-613	pyruvate dehydrogenase inhibitor	Energy Metabolism Inhibitor
dichloroacetate	pyruvate dehydrogenase kinase inhibitor	Energy Metabolism Inhibitor
AZD7545	pyruvate dehydrogenase kinase inhibitor	Energy Metabolism Inhibitor
iodixanol	radiopaque medium	Other
iocetamic-acid	radiopaque medium	Other
gadoterate-meglumine	radiopaque medium	Other
ioversol	radiopaque medium	Other
MLN2480	RAF inhibitor	Pro-Apoptosis
SB-590885	RAF inhibitor	Pro-Apoptosis
CEP-32496	RAF inhibitor	Pro-Apoptosis
GDC-0879	RAF inhibitor	Pro-Apoptosis
AZ-628	RAF inhibitor	Pro-Apoptosis
vemurafenib	RAF inhibitor	Pro-Apoptosis
PLX-4720	RAF inhibitor	Pro-Apoptosis
dabrafenib	RAF inhibitor	Pro-Apoptosis
LGX818	RAF inhibitor	Pro-Apoptosis
RAF265	RAF inhibitor, VEGFR inhibitor	Growth Factor Inhibitors
azeliragon	RAGE receptor antagonist	Oxidative Stress Inhibitors
NSC-23766	Ras GTPase inhibitor	Pro-Apoptosis
aliskiren-hemifumarate	renin inhibitor	Angiogenesis Activator
VTP-27999	renin inhibitor	Angiogenesis Activator
TTNPB	retinoid receptor agonist	Growth Factor Inhibitors
BMS-649	retinoid receptor agonist	Growth Factor Inhibitors
CD-437	retinoid receptor agonist	Growth Factor Inhibitors
acitretin	retinoid receptor agonist	Growth Factor Inhibitors
CD-1530	retinoid receptor agonist	Growth Factor Inhibitors
adarotene	retinoid receptor agonist	Growth Factor Inhibitors
fasudil	rho associated kinase inhibitor	Pro-Apoptosis
KD025	rho associated kinase inhibitor	Pro-Apoptosis
thiazovivin	rho associated kinase inhibitor	Pro-Apoptosis
hydroxyurea	ribonucleotide reductase inhibitor	Pro-Apoptosis
fludarabine-phosphate	ribonucleotide reductase inhibitor	Pro-Apoptosis
triapine	ribonucleotide reductase inhibitor	Pro-Apoptosis
gemcitabine	ribonucleotide reductase inhibitor	Pro-Apoptosis
clofarabine	ribonucleotide reductase inhibitor	Pro-Apoptosis
BI-D1870	ribosomal protein inhibitor	Protein Synthesis Inhibitor
triptolide	RNA polymerase inhibitor	Transcription Inhibitor
favipiravir	RNA polymerase inhibitor	Transcription Inhibitor
CX-5461	RNA polymerase inhibitor	Transcription Inhibitor
balapiravir	RNA polymerase inhibitor	Transcription Inhibitor
rifampin	RNA polymerase inhibitor	Transcription Inhibitor
[truncated: 333 more rows]
